# Supplementary material
Source: publisher figshare collection journal article supplement (https://gsapubs.figshare.com/articles/dataset/_/12347795)
Supplement: Supplementary file 1 [file 1]

Table DR1. Granular 1-D Model

| x (m)    | z (m)    | z+800 (m) | dz/dx (m/m) | slope (deg) | slope*10 | shear rate | l        | mu (friction a (m^2/s) | v_hor (m/s) | v (m/s)  | t (s)    | eta (Pa s) | tau_y (Pa) | angle   | tan(angle)                                                                            | g (m^2/s) | I_0      | d (m) | h (m) | rho_mix (kg/m^3) | rho_s (kg/m^3) |      |      |
|----------|----------|-----------|-------------|-------------|----------|------------|----------|------------------------|-------------|----------|----------|------------|------------|---------|---------------------------------------------------------------------------------------|-----------|----------|-------|-------|------------------|----------------|------|------|
| 0        | -2199.62 | 800.3799  | 0.890791    | 41.69436    | 416.9436 | 0          | 0.001    | 0.382797               | 1.422453    | 0        | 0        | 0          | #DIV/0!    | 1388.74 | mu_s                                                                                  | 20.9      | 0.381863 | 3.73  | 0.279 | 0.001            | 0.75           | 1300 | 2700 |
| 1.41421  | -2200.88 | 799.1201  | 1.421285    | 54.87022    | 548.7022 | 4.713607   | 0.001    | 0.382797               | 2.240916    | 1.017132 | 1.767603 | 2.780779   | 295.3445   | 1388.74 | mu_2                                                                                  | 32.76     | 0.643468 |       |       |                  |                |      |      |
| 2.82843  | -2202.89 | 797.1101  | 1.011129    | 45.3216     | 453.216  | 9.494694   | 0.004061 | 0.385616               | 1.649728    | 2.50349  | 3.56051  | 3.584171   | 147.7026   | 1388.74 | Note: observed flow is approx. 1250 m from likely initiation point                    |           |          |       |       |                  |                |      |      |
| 4.24264  | -2204.32 | 795.6799  | 1.598072    | 57.96356    | 579.6356 | 11.24206   | 0.008181 | 0.389315               | 2.404483    | 2.236291 | 4.215771 | 4.180912   | 125.9416   | 1388.74 | Note: friction law used here is Eq. 2 of Jop et al., Nature, v. 441, p. 727-730, 2006 |           |          |       |       |                  |                |      |      |
| 5.65685  | -2206.58 | 793.4199  | 1.169922    | 49.47757    | 494.7757 | 13.39299   | 0.009687 | 0.390641               | 1.898754    | 3.263264 | 5.022371 | 4.695211   | 106.0751   | 1388.74 |                                                                                       |           |          |       |       |                  |                |      |      |
| 6.65685  | -2207.75 | 792.25    | 1.046499    | 46.30162    | 463.0162 | 14.40115   | 0.01154  | 0.392254               | 1.694976    | 3.730952 | 5.400431 | 4.981162   | 99.05655   | 1388.74 |                                                                                       |           |          |       |       |                  |                |      |      |
| 8.07107  | -2209.23 | 790.77    | 1.392983    | 54.32605    | 543.2605 | 15.58479   | 0.012409 | 0.393002               | 2.186853    | 3.40823  | 5.844297 | 5.377347   | 91.70809   | 1388.74 |                                                                                       |           |          |       |       |                  |                |      |      |
| 9.48528  | -2211.2  | 788.8     | 1.484997    | 56.0436     | 560.436  | 16.99593   | 0.013428 | 0.393876               | 2.28547     | 3.55998  | 6.373474 | 5.783251   | 84.28066   | 1388.74 |                                                                                       |           |          |       |       |                  |                |      |      |
| 10.89949 | -2213.3  | 786.7     | 0.643402    | 32.75731    | 327.5731 | 18.34826   | 0.014644 | 0.394909               | 0.783656    | 5.786375 | 6.880597 | 6.085874   | 78.27374   | 1388.74 |                                                                                       |           |          |       |       |                  |                |      |      |
| 12.31371 | -2214.21 | 785.79    | 1.090088    | 47.46806    | 474.6806 | 18.77778   | 0.01581  | 0.395892               | 1.75979     | 4.760175 | 7.041668 | 6.35406    | 76.67358   | 1388.74 |                                                                                       |           |          |       |       |                  |                |      |      |
| 13.31371 | -2215.3  | 784.7     | 0.73999     | 36.50108    | 365.0108 | 19.44421   | 0.01618  | 0.396202               | 1.036322    | 5.861304 | 7.291579 | 6.542357   | 74.10373   | 1388.74 |                                                                                       |           |          |       |       |                  |                |      |      |
| 14.31371 | -2216.04 | 783.96    | 0.969971    | 44.12668    | 441.2668 | 19.82321   | 0.016754 | 0.396682               | 1.543154    | 5.335929 | 7.433704 | 6.720973   | 72.77501   | 1388.74 |                                                                                       |           |          |       |       |                  |                |      |      |
| 15.31371 | -2217.01 | 782.99    | 0.989883    | 44.7087     | 447.087  | 20.37678   | 0.01708  | 0.396955               | 1.580212    | 5.430611 | 7.641293 | 6.906734   | 70.84653   | 1388.74 |                                                                                       |           |          |       |       |                  |                |      |      |
| 16.72792 | -2218.41 | 781.5901  | 0.968815    | 44.09253    | 440.9253 | 21.15667   | 0.017557 | 0.397351               | 1.539131    | 5.698154 | 7.933751 | 7.160888   | 68.30311   | 1388.74 |                                                                                       |           |          |       |       |                  |                |      |      |
| 18.14214 | -2219.78 | 780.22    | 1.739459    | 60.10578    | 601.0578 | 21.88828   | 0.018229 | 0.397907               | 2.507362    | 4.090922 | 8.208106 | 7.449826   | 66.11253   | 1388.74 |                                                                                       |           |          |       |       |                  |                |      |      |
| 19.55635 | -2222.24 | 777.76    | 1.378827    | 54.04835    | 540.4835 | 23.04029   | 0.01886  | 0.398427               | 2.158482    | 5.072629 | 8.640111 | 7.758486   | 62.88895   | 1388.74 |                                                                                       |           |          |       |       |                  |                |      |      |
| 20.97056 | -2224.19 | 775.8101  | 1.251587    | 51.37565    | 513.7565 | 23.98243   | 0.019852 | 0.399241               | 1.995166    | 5.613791 | 8.99341  | 8.02316    | 60.54182   | 1388.74 |                                                                                       |           |          |       |       |                  |                |      |      |
| 22.38478 | -2225.96 | 774.04    | 1.357593    | 53.62473    | 536.2473 | 24.81907   | 0.020664 | 0.399903               | 2.129921    | 5.519806 | 9.307151 | 8.277206   | 58.59792   | 1388.74 |                                                                                       |           |          |       |       |                  |                |      |      |
| 23.79899 | -2227.88 | 772.1201  | 1.315298    | 52.75485    | 527.5485 | 25.68211   | 0.021385 | 0.400487               | 2.076254    | 5.82881  | 9.63079  | 8.526436   | 56.71153   | 1388.74 |                                                                                       |           |          |       |       |                  |                |      |      |
| 25.2132  | -2229.74 | 770.26    | 1.046499    | 46.30162    | 463.0162 | 26.49513   | 0.022129 | 0.401087               | 1.672091    | 6.864178 | 9.935673 | 8.749269   | 55.05366   | 1388.74 |                                                                                       |           |          |       |       |                  |                |      |      |
| 26.62742 | -2231.22 | 768.78    | 1.080078    | 47.20466    | 472.0466 | 27.1298    | 0.022829 | 0.40165                | 1.728419    | 6.911807 | 10.17367 | 8.954586   | 53.84115   | 1388.74 |                                                                                       |           |          |       |       |                  |                |      |      |
| 27.62742 | -2232.3  | 767.7     | 0.664641    | 33.60963    | 336.0963 | 27.58284   | 0.023376 | 0.402087               | 0.819983    | 8.614414 | 10.34357 | 9.0834     | 53.01448   | 1388.74 |                                                                                       |           |          |       |       |                  |                |      |      |
| 29.04163 | -2233.24 | 766.76    | 1.046507    | 46.30182    | 463.0182 | 27.8818    | 0.023766 | 0.402398               | 1.668707    | 7.223403 | 10.45568 | 9.261987   | 52.48663   | 1388.74 |                                                                                       |           |          |       |       |                  |                |      |      |
| 30.45584 | -2234.72 | 765.28    | 1.3436      | 53.34084    | 533.4084 | 28.48368   | 0.024024 | 0.402603               | 2.106846    | 6.377357 | 10.68138 | 9.469947   | 51.40372   | 1388.74 |                                                                                       |           |          |       |       |                  |                |      |      |
| 31.87006 | -2236.62 | 763.3799  | 0.961571    | 43.87767    | 438.7767 | 29.22754   | 0.024543 | 0.403015               | 1.509822    | 7.900439 | 10.96033 | 9.668048   | 50.14666   | 1388.74 |                                                                                       |           |          |       |       |                  |                |      |      |
| 33.28427 | -2237.98 | 762.02    | 1.340088    | 53.26897    | 532.6897 | 29.74704   | 0.025184 | 0.403521               | 2.100458    | 6.671435 | 11.15514 | 9.862149   | 49.33285   | 1388.74 |                                                                                       |           |          |       |       |                  |                |      |      |
| 34.28427 | -2239.32 | 760.6799  | 1.23744     | 51.05763    | 510.5763 | 30.24916   | 0.025631 | 0.403874               | 1.964731    | 7.129785 | 11.34344 | 10.00706   | 48.55634   | 1388.74 |                                                                                       |           |          |       |       |                  |                |      |      |
| 35.69848 | -2241.07 | 758.9299  | 0.39585     | 21.59612    | 215.9612 | 30.90236   | 0.026064 | 0.404214               | -0.029164   | 10.7749  | 11.58838 | 10.16503   | 47.56998   | 1388.74 |                                                                                       |           |          |       |       |                  |                |      |      |
| 37.11269 | -2241.63 | 758.3701  | 1.21637     | 50.57575    | 505.7575 | 30.89287   | 0.026627 | 0.404654               | 1.933073    | 7.357029 | 11.58482 | 10.32103   | 47.63646   | 1388.74 |                                                                                       |           |          |       |       |                  |                |      |      |
| 38.52691 | -2243.35 | 756.6499  | 1.216206    | 50.57196    | 505.7196 | 31.52215   | 0.026618 | 0.404648               | 1.932853    | 7.507495 | 11.8208  | 10.51131   | 46.68475   | 1388.74 |                                                                                       |           |          |       |       |                  |                |      |      |
| 39.94112 | -2245.07 | 754.9299  | 0.47998     | 25.6401     | 256.401  | 32.13879   | 0.027161 | 0.405071               | 0.25325     | 10.86528 | 12.05205 | 10.66525   | 45.83687   | 1388.74 |                                                                                       |           |          |       |       |                  |                |      |      |
| 40.94112 | -2245.55 | 754.45    | 0.975727    | 44.29612    | 442.9612 | 32.19482   | 0.027692 | 0.405484               | 1.530547    | 8.641172 | 12.07306 | 10.76778   | 45.80375   | 1388.74 |                                                                                       |           |          |       |       |                  |                |      |      |
| 42.35533 | -2246.93 | 753.0701  | 1.025266    | 45.71474    | 457.1474 | 32.67292   | 0.02774  | 0.405521               | 1.622718    | 8.554968 | 12.25234 | 10.93226   | 45.13768   | 1388.74 |                                                                                       |           |          |       |       |                  |                |      |      |
| 43.76955 | -2248.38 | 751.6201  | 0.502192    | 26.66544    | 266.6544 | 33.17239   | 0.028152 | 0.40584                | 0.322889    | 11.11659 | 12.43965 | 11.07605   | 44.49304   | 1388.74 |                                                                                       |           |          |       |       |                  |                |      |      |
| 45.18376 | -2249.09 | 750.9099  | 1.389893    | 54.26574    | 542.6574 | 33.27028   | 0.028583 | 0.406173               | 2.154445    | 7.286524 | 12.47635 | 11.22974   | 44.39848   | 1388.74 |                                                                                       |           |          |       |       |                  |                |      |      |
| 46.18376 | -2250.48 | 749.52    | 0.721265    | 35.80158    | 358.0158 | 33.73076   | 0.028667 | 0.406238               | 0.958131    | 10.25897 | 12.64904 | 11.34373   | 43.79937   | 1388.74 |                                                                                       |           |          |       |       |                  |                |      |      |
| 47.59797 | -2251.5  | 748.5     | 0.855574    | 40.54943    | 405.4943 | 34.01642   | 0.029064 | 0.406544               | 1.279476    | 9.692708 | 12.75616 | 11.48549   | 43.46422   | 1388.74 |                                                                                       |           |          |       |       |                  |                |      |      |
| 49.01218 | -2252.71 | 747.29    | 0.949951    | 43.52973    | 435.2973 | 34.39469   | 0.02931  | 0.406733               | 1.47691     | 9.351276 | 12.89801 | 11.63401   | 43.00621   | 1388.74 |                                                                                       |           |          |       |       |                  |                |      |      |
| 50.01218 | -2253.66 | 746.3401  | 0.537406    | 28.25383    | 282.5383 | 34.70004   | 0.029636 | 0.406983               | 0.430816    | 11.46219 | 13.01251 | 11.7301    | 42.65397   | 1388.74 |                                                                                       |           |          |       |       |                  |                |      |      |
| 51.4264  | -2254.42 | 745.5801  | 0.608189    | 31.30752    | 313.0752 | 34.82489   | 0.029899 | 0.407184               | 0.644014    | 11.15777 | 13.05934 | 11.85515   | 42.52208   | 1388.74 |                                                                                       |           |          |       |       |                  |                |      |      |
| 52.84061 | -2255.28 | 744.72    | 0.449951    | 24.22542    | 242.2542 | 35.01087   | 0.030006 | 0.407266               | 0.145972    | 11.97291 | 13.12908 | 11.97743   | 42.30475   | 1388.74 |                                                                                       |           |          |       |       |                  |                |      |      |
| 53.84061 | -2255.73 | 744.27    | 0.586955    | 30.41103    | 304.1103 | 35.04052   | 0.030167 | 0.407389               | 0.580729    | 11.33232 | 13.14019 | 12.06324   | 42.28166   | 1388.74 |                                                                                       |           |          |       |       |                  |                |      |      |
| 55.25482 | -2256.56 | 743.4399  | 0.77002     | 37.59697    | 375.9697 | 35.20719   | 0.030192 | 0.407408               | 1.077393    | 10.46078 | 13.2027  | 12.19303   | 42.08352   | 1388.74 |                                                                                       |           |          |       |       |                  |                |      |      |
| 56.25482 | -2257.33 | 742.6699  | 0.912198    | 42.371      | 423.71   | 35.4248    | 0.030336 | 0.407518               | 1.398209    | 9.814395 | 13.2843  | 12.29167   | 41.83625   | 1388.74 |                                                                                       |           |          |       |       |                  |                |      |      |
| 57.66903 | -2258.62 | 741.3799  | 0.445392    | 24.00783    | 240.0783 | 35.82173   | 0.030523 | 0.407661               | 0.129253    | 12.27105 | 13.43315 | 12.41974   | 41.38719   | 1388.74 |                                                                                       |           |          |       |       |                  |                |      |      |
| 59.08325 | -2259.25 | 740.75    | 1.110119    | 47.98732    | 479.8732 | 35.85802   | 0.030865 | 0.407921               | 1.762414    | 8.999847 | 13.44676 | 12.55271   | 41.3717    | 1388.74 |                                                                                       |           |          |       |       |                  |                |      |      |
| 60.08324 | -2260.36 | 739.6399  | 0.516172    | 27.30151    | 273.0151 | 36.20752   | 0.030897 | 0.407945               | 0.360641    | 12.06532 | 13.57782 | 12.64765   | 40.97473   | 1388.74 |                                                                                       |           |          |       |       |                  |                |      |      |
| 61.49746 | -2261.09 | 738.9099  | 0.707109    | 35.26446    | 352.6446 | 36.30769   | 0.031198 | 0.408174               | 0.915297    | 11.11691 | 13.61538 | 12.76966   | 40.88459   | 1388.74 |                                                                                       |           |          |       |       |                  |                |      |      |
| 62.91167 | -2262.09 | 737.9099  | 0.629246    | 32.18       | 321.8    | 36.56121   | 0.031284 | 0.408239               | 0.70146     | 11.60424 | 13.71046 | 12.89415   | 40.6076    | 1388.74 |                                                                                       |           |          |       |       |                  |                |      |      |
| 64.32589 | -2262.98 | 737.02    | 0.636324    | 32.46958    | 324.6958 | 36.75416   | 0.031503 | 0.408404               | 0.721089    | 11.62823 | 13.78281 |            |            |         |                                                                                       |           |          |       |       |                  |                |      |      |

|          |          |          |          |          |          |          |          |          |           |          |          |          |          |         |
|----------|----------|----------|----------|----------|----------|----------|----------|----------|-----------|----------|----------|----------|----------|---------|
| 75.63963 | -2270.68 | 729.3201 | 0.685875 | 34.44524 | 344.4524 | 38.54667 | 0.033024 | 0.409551 | 0.854531  | 11.92057 | 14.455   | 13.9868  | 38.63977 | 1388.74 |
| 77.05384 | -2271.65 | 728.3501 | 0.636497 | 32.47662 | 324.7662 | 38.76961 | 0.033213 | 0.409693 | 0.717504  | 12.26492 | 14.5386  | 14.10375 | 38.43085 | 1388.74 |
| 78.46806 | -2272.55 | 727.45   | 0.742493 | 36.59364 | 365.9364 | 38.95573 | 0.033405 | 0.409836 | 1.001568  | 11.72885 | 14.6084  | 14.22163 | 38.26066 | 1388.74 |
| 79.88228 | -2273.6  | 726.3999 | 0.65048  | 33.0432  | 330.432  | 39.21429 | 0.033566 | 0.409956 | 0.756081  | 12.32691 | 14.70536 | 14.33921 | 38.0195  | 1388.74 |
| 81.2965  | -2274.52 | 725.48   | 0.700031 | 34.9932  | 349.932  | 39.40819 | 0.033789 | 0.410122 | 0.89062   | 12.10649 | 14.77807 | 14.45497 | 37.84778 | 1388.74 |
| 82.71071 | -2275.51 | 724.49   | 0.763727 | 37.36995 | 373.6995 | 39.63547 | 0.033956 | 0.410247 | 1.053459  | 11.81236 | 14.8633  | 14.57322 | 37.64219 | 1388.74 |
| 84.12493 | -2276.59 | 723.4099 | 0.798944 | 38.6229  | 386.229  | 39.90276 | 0.034151 | 0.410393 | 1.138365  | 11.69058 | 14.96354 | 14.69357 | 37.40333 | 1388.74 |
| 85.53915 | -2277.72 | 722.28   | 0.83434  | 39.83959 | 398.3959 | 40.18966 | 0.034382 | 0.410564 | 1.220221  | 11.57223 | 15.07112 | 14.81515 | 37.15182 | 1388.74 |
| 86.95336 | -2278.9  | 721.1001 | 0.862818 | 40.78822 | 407.8822 | 40.495   | 0.034629 | 0.410748 | 1.283534  | 11.49748 | 15.18562 | 14.93776 | 36.88818 | 1388.74 |
| 88.36758 | -2280.12 | 719.8799 | 1.124184 | 48.34582 | 483.4582 | 40.81376 | 0.034892 | 0.410943 | 1.777664  | 10.17231 | 15.30516 | 15.06828 | 36.61746 | 1388.74 |
| 89.7818  | -2281.71 | 718.29   | 0.790039 | 38.31011 | 383.1011 | 41.25178 | 0.035167 | 0.411146 | 1.114893  | 12.13834 | 15.46942 | 15.19506 | 36.24657 | 1388.74 |
| 90.7818  | -2282.5  | 717.5    | 0.870117 | 41.02709 | 410.2709 | 41.44397 | 0.035544 | 0.411425 | 1.297639  | 11.72449 | 15.54149 | 15.27887 | 36.10294 | 1388.74 |
| 91.7818  | -2283.37 | 716.6299 | 0.579834 | 30.10661 | 301.0661 | 41.66662 | 0.03571  | 0.411547 | 0.54594   | 13.51707 | 15.62498 | 15.3581  | 35.92068 | 1388.74 |
| 92.7818  | -2283.95 | 716.05   | 0.572795 | 29.80388 | 298.0388 | 41.7598  | 0.035902 | 0.411688 | 0.524242  | 13.58861 | 15.65992 | 15.43189 | 35.85284 | 1388.74 |
| 94.19602 | -2284.76 | 715.24   | 1.081889 | 47.25251 | 472.5251 | 41.88605 | 0.035982 | 0.411747 | 1.705767  | 10.6616  | 15.70727 | 15.54852 | 35.7499  | 1388.74 |
| 95.61024 | -2286.29 | 713.71   | 0.735415 | 36.33133 | 363.3133 | 42.29559 | 0.036091 | 0.411827 | 0.977565  | 12.77757 | 15.86085 | 15.66919 | 35.41061 | 1388.74 |
| 97.02446 | -2287.33 | 712.6699 | 0.619873 | 31.79366 | 317.9366 | 42.52803 | 0.036444 | 0.412086 | 0.662282  | 13.55503 | 15.94801 | 15.77661 | 35.23924 | 1388.74 |
| 98.02446 | -2287.95 | 712.05   | 0.388944 | 21.25326 | 212.5326 | 42.63877 | 0.036644 | 0.412233 | -0.081394 | 14.90205 | 15.98954 | 15.84689 | 35.16024 | 1388.74 |
| 99.43867 | -2288.5  | 711.5    | 0.594029 | 30.71155 | 307.1155 | 42.61957 | 0.036739 | 0.412303 | 0.585896  | 13.74081 | 15.98234 | 15.94564 | 35.18204 | 1388.74 |
| 100.8529 | -2289.34 | 710.6599 | 0.692948 | 34.71993 | 347.1993 | 42.75782 | 0.036723 | 0.412291 | 0.865067  | 13.17923 | 16.03418 | 16.0507  | 35.06725 | 1388.74 |
| 102.2671 | -2290.32 | 709.6799 | 0.700026 | 34.99301 | 349.9301 | 42.96129 | 0.036842 | 0.412378 | 0.883677  | 13.19806 | 16.11048 | 16.15793 | 34.90855 | 1388.74 |
| 103.6813 | -2291.31 | 708.6899 | 0.72998  | 36.12871 | 361.2871 | 43.16815 | 0.037017 | 0.412506 | 0.961583  | 13.075   | 16.18805 | 16.26559 | 34.75208 | 1388.74 |
| 104.6813 | -2292.04 | 707.96   | 0.452474 | 24.34549 | 243.4549 | 43.32655 | 0.037195 | 0.412637 | 0.136104  | 14.80267 | 16.24746 | 16.33733 | 34.63595 | 1388.74 |
| 106.0955 | -2292.68 | 707.3201 | 0.608185 | 31.30734 | 313.0734 | 43.35814 | 0.037332 | 0.412736 | 0.626212  | 13.89182 | 16.2593  | 16.4359  | 34.61907 | 1388.74 |
| 107.5098 | -2293.54 | 706.46   | 0.671714 | 33.8898  | 338.898  | 43.50339 | 0.037359 | 0.412756 | 0.806115  | 13.54225 | 16.31377 | 16.539   | 34.50514 | 1388.74 |
| 108.924  | -2294.49 | 705.51   | 0.530328 | 27.93824 | 279.3824 | 43.68973 | 0.037484 | 0.412847 | 0.389207  | 14.47419 | 16.38365 | 16.63996 | 34.36556 | 1388.74 |
| 110.3382 | -2295.24 | 704.76   | 0.780029 | 37.95527 | 379.5527 | 43.77932 | 0.037645 | 0.412964 | 1.085353  | 12.94485 | 16.41725 | 16.74311 | 34.30495 | 1388.74 |
| 111.3382 | -2296.02 | 703.98   | 0.669922 | 33.819   | 338.19   | 43.95562 | 0.037722 | 0.41302  | 0.800377  | 13.69437 | 16.48336 | 16.81819 | 34.17201 | 1388.74 |
| 112.3382 | -2296.69 | 703.3101 | 0.77002  | 37.59697 | 375.9697 | 44.0851  | 0.037874 | 0.413131 | 1.06039   | 13.0986  | 16.53191 | 16.89284 | 34.08076 | 1388.74 |
| 113.3382 | -2297.46 | 702.54   | 0.52325  | 27.6208  | 276.208  | 44.25615 | 0.037985 | 0.413212 | 0.365615  | 14.70469 | 16.59606 | 16.96477 | 33.9557  | 1388.74 |
| 114.7524 | -2298.2  | 701.8    | 0.601107 | 31.01037 | 310.1037 | 44.33923 | 0.038133 | 0.413319 | 0.603556  | 14.25075 | 16.62721 | 17.06245 | 33.90085 | 1388.74 |
| 116.1666 | -2299.05 | 700.95   | 0.685875 | 34.44524 | 344.4524 | 44.47612 | 0.038204 | 0.413371 | 0.842718  | 13.75425 | 16.67855 | 17.16345 | 33.80075 | 1388.74 |
| 117.5809 | -2300.02 | 699.98   | 1.004032 | 45.11527 | 451.1527 | 44.66667 | 0.038322 | 0.413456 | 1.562846  | 11.82019 | 16.75    | 17.27405 | 33.66352 | 1388.74 |
| 118.9951 | -2301.44 | 698.5601 | 0.176776 | 10.02494 | 100.2494 | 45.01855 | 0.038487 | 0.413575 | -0.87444  | 16.6242  | 16.88196 | 17.37348 | 33.41001 | 1388.74 |
| 120.4093 | -2301.69 | 698.3101 | 0.350098 | 19.29503 | 192.9503 | 44.82321 | 0.03879  | 0.413795 | -0.225447 | 15.86455 | 16.8087  | 17.46054 | 33.57341 | 1388.74 |
| 121.4093 | -2302.04 | 697.96   | 0.47998  | 25.6401  | 256.401  | 44.78744 | 0.038621 | 0.413673 | 0.224168  | 15.14146 | 16.79529 | 17.52505 | 33.59034 | 1388.74 |
| 122.4093 | -2302.52 | 697.48   | 0.649902 | 33.01993 | 330.1993 | 44.82303 | 0.038591 | 0.413651 | 0.742847  | 14.09372 | 16.80864 | 17.59346 | 33.56186 | 1388.74 |
| 123.4093 | -2303.17 | 696.8301 | 0.499995 | 26.56482 | 265.6482 | 44.94088 | 0.038621 | 0.413673 | 0.289534  | 15.07366 | 16.85283 | 17.66203 | 33.47564 | 1388.74 |
| 124.4093 | -2303.67 | 696.3301 | 0.380131 | 20.81334 | 208.1334 | 44.9867  | 0.038723 | 0.413746 | -0.117832 | 15.76913 | 16.87001 | 17.72687 | 33.44749 | 1388.74 |
| 125.4093 | -2304.05 | 695.95   | 0.310059 | 17.2265  | 172.265  | 44.96807 | 0.038762 | 0.413775 | -0.371489 | 16.10658 | 16.86303 | 17.78962 | 33.46365 | 1388.74 |
| 126.4093 | -2304.36 | 695.6399 | 0.254462 | 14.27663 | 142.7663 | 44.90933 | 0.038746 | 0.413763 | -0.578929 | 16.32089 | 16.841   | 17.85129 | 33.50648 | 1388.74 |
| 127.8235 | -2304.72 | 695.28   | 0.636501 | 32.47681 | 324.7681 | 44.77969 | 0.038696 | 0.413727 | 0.704755  | 14.1662  | 16.79238 | 17.94407 | 33.60051 | 1388.74 |
| 129.2377 | -2305.62 | 694.3799 | 0.417084 | 22.64021 | 226.4021 | 44.93796 | 0.038584 | 0.413646 | 0.011898  | 15.55314 | 16.85173 | 18.03924 | 33.47563 | 1388.74 |
| 130.6519 | -2306.21 | 693.79   | 1.050049 | 46.39851 | 463.9851 | 44.94062 | 0.03872  | 0.413744 | 1.645575  | 11.62229 | 16.85273 | 18.14332 | 33.48163 | 1388.74 |
| 131.6519 | -2307.26 | 692.74   | 0.494941 | 26.33272 | 263.3272 | 45.20101 | 0.038723 | 0.413746 | 0.272887  | 15.19149 | 16.95038 | 18.21791 | 33.28889 | 1388.74 |
| 133.0661 | -2307.96 | 692.04   | 0.830078 | 39.69532 | 396.9532 | 45.26172 | 0.038947 | 0.413908 | 1.200835  | 13.06002 | 16.97315 | 18.31802 | 33.25726 | 1388.74 |
| 134.0661 | -2308.79 | 691.21   | 0.550043 | 28.8127  | 288.127  | 45.45038 | 0.038999 | 0.413946 | 0.447182  | 14.93386 | 17.04389 | 18.38947 | 33.12223 | 1388.74 |
| 135.0661 | -2309.34 | 690.6599 | 0.381694 | 20.89154 | 208.9154 | 45.52035 | 0.039162 | 0.414063 | -0.113406 | 15.94789 | 17.07013 | 18.45423 | 33.08069 | 1388.74 |
| 136.4804 | -2309.88 | 690.1201 | 0.90512  | 42.14886 | 421.4886 | 45.4953  | 0.039222 | 0.414107 | 1.365146  | 12.64889 | 17.06074 | 18.55314 | 33.10238 | 1388.74 |
| 137.8946 | -2311.16 | 688.8401 | 0.876808 | 41.24453 | 412.4453 | 45.79706 | 0.039201 | 0.414091 | 1.304692  | 12.9131  | 17.1739  | 18.66379 | 32.88303 | 1388.74 |
| 139.3088 | -2312.4  | 687.6001 | 0.290039 | 16.17422 | 161.7422 | 46.08356 | 0.039461 | 0.414278 | -0.447457 | 16.59732 | 17.28133 | 18.75963 | 32.69338 | 1388.74 |
| 140.3088 | -2312.69 | 687.3101 | 0.22998  | 12.9517  | 129.517  | 46.01451 | 0.039707 | 0.414456 | -0.674184 | 16.81645 | 17.25544 | 18.81949 | 32.75647 | 1388.74 |
| 141.3088 | -2312.92 | 687.0801 | 0.52002  | 27.47531 | 274.7531 | 45.91032 | 0.039648 | 0.414413 | 0.351356  | 15.27453 | 17.21637 | 18.88181 | 32.82742 | 1388.74 |
| 142.3088 | -2313.44 | 686.5601 | 0.570068 | 29.6861  | 296.861  | 45.96474 | 0.039558 | 0.414349 | 0.507307  | 14.97448 | 17.23678 | 18.94793 | 32.78344 | 1388.74 |
| 143.3088 | -2314.01 | 685.99   | 0.445396 | 24.00798 | 240.0798 | 46.04323 | 0.039605 | 0.414382 | 0.106238  | 15.77249 | 17.26621 | 19.01297 | 32.73023 | 1388.74 |
| 144.723  | -2314.64 | 685.3601 | 0.590082 | 30.54409 | 305.4409 | 46.06643 | 0.039673 | 0.414431 | 0.56729   | 14.87782 | 17.27491 | 19.10526 | 32.71758 | 1388.74 |
| 145.723  | -2315.23 | 684.77   | 0.610107 | 31.38768 | 313.8768 | 46.154   | 0.039693 | 0.414445 | 0.62636   | 14.77498 | 17.30775 | 19.1727  | 32.65663 | 1388.74 |
| 146.723  | -2315.84 | 684.1599 | 0.43124  | 23.32762 | 233.2762 | 46.25051 | 0.039768 | 0.4145   | 0.057643  | 15.92617 | 17.34394 | 19.23785 | 32.59275 | 1388.74 |
| 148.1372 | -2316.45 | 683.55   | 0.72998  | 36.12871 | 361.2871 | 46.26304 | 0.039851 | 0.414559 | 0.955365  | 14.0124  | 17.34864 | 19.33232 | 32.58862 | 1388.74 |
| 149.1372 | -2317.18 | 682.8201 | 0.370117 | 20.31038 | 203.1038 | 46.40989 | 0.039862 | 0.414567 | -0.156323 | 16.32165 | 17.40371 | 19.39825 | 32.48611 | 1388.74 |

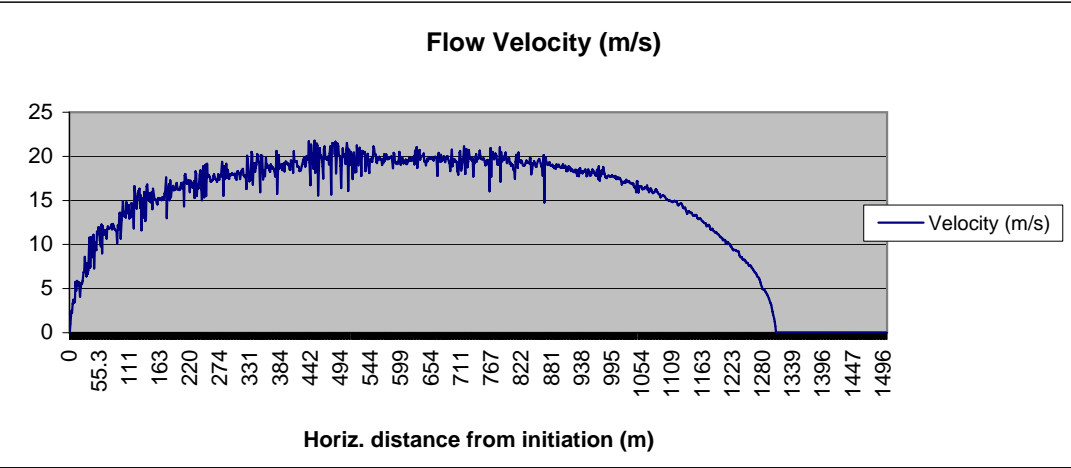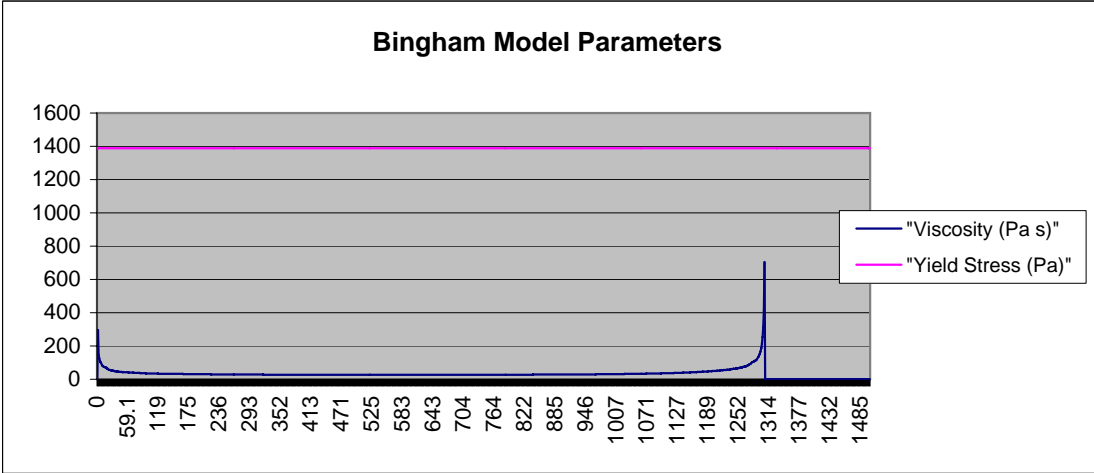

|          |          |          |          |          |          |          |          |          |           |          |          |          |          |         |
|----------|----------|----------|----------|----------|----------|----------|----------|----------|-----------|----------|----------|----------|----------|---------|
| 150.1372 | -2317.55 | 682.45   | 0.494941 | 26.33272 | 263.3272 | 46.38594 | 0.039989 | 0.414658 | 0.269823  | 15.58973 | 17.39473 | 19.46093 | 32.51    | 1388.74 |
| 151.5514 | -2318.25 | 681.75   | 0.579877 | 30.10847 | 301.0847 | 46.44444 | 0.039968 | 0.414643 | 0.536027  | 15.06676 | 17.41666 | 19.55319 | 32.4679  | 1388.74 |
| 152.9656 | -2319.07 | 680.9299 | 0.579705 | 30.10107 | 301.0107 | 46.5605  | 0.040018 | 0.414679 | 0.535389  | 15.10554 | 17.46019 | 19.64693 | 32.38978 | 1388.74 |
| 154.3798 | -2319.89 | 680.1101 | 0.586955 | 30.41103 | 304.1103 | 46.67614 | 0.040118 | 0.414751 | 0.55692   | 15.09535 | 17.50355 | 19.74058 | 32.31513 | 1388.74 |
| 155.794  | -2320.72 | 679.28   | 0.650485 | 33.04338 | 330.4338 | 46.79613 | 0.040218 | 0.414822 | 0.740797  | 14.71021 | 17.54855 | 19.83548 | 32.23781 | 1388.74 |
| 157.2083 | -2321.64 | 678.3601 | 0.678969 | 34.1753  | 341.753  | 46.95533 | 0.040321 | 0.414896 | 0.819276  | 14.56771 | 17.60825 | 19.93209 | 32.13425 | 1388.74 |
| 158.6225 | -2322.6  | 677.3999 | 0.586783 | 30.40367 | 304.0367 | 47.1308  | 0.040459 | 0.414994 | 0.555615  | 15.24354 | 17.67405 | 20.02696 | 32.02218 | 1388.74 |
| 160.0367 | -2323.43 | 676.5701 | 0.601111 | 31.01055 | 310.1055 | 47.24935 | 0.04061  | 0.415103 | 0.597836  | 15.18604 | 17.71851 | 20.11991 | 31.95016 | 1388.74 |
| 161.4509 | -2324.28 | 675.72   | 0.600939 | 31.00329 | 310.0329 | 47.3766  | 0.040712 | 0.415176 | 0.597092  | 15.2281  | 17.76622 | 20.21291 | 31.86994 | 1388.74 |
| 162.8651 | -2325.13 | 674.8701 | 0.615267 | 31.60263 | 316.0263 | 47.50334 | 0.040822 | 0.415254 | 0.63882   | 15.17203 | 17.81375 | 20.30595 | 31.7909  | 1388.74 |
| 164.2793 | -2326    | 674      | 0.622173 | 31.88874 | 318.8874 | 47.63858 | 0.040931 | 0.415332 | 0.658589  | 15.16828 | 17.86447 | 20.39917 | 31.7066  | 1388.74 |
| 165.6935 | -2326.88 | 673.1201 | 0.650657 | 33.05033 | 330.5033 | 47.77761 | 0.041047 | 0.415415 | 0.739419  | 15.01755 | 17.9166  | 20.49287 | 31.62066 | 1388.74 |
| 167.1077 | -2327.8  | 672.2    | 0.608017 | 31.3003  | 313.003  | 47.93325 | 0.041167 | 0.4155   | 0.616864  | 15.35882 | 17.97497 | 20.58599 | 31.52446 | 1388.74 |
| 168.5219 | -2328.66 | 671.3401 | 0.636501 | 32.47681 | 324.7681 | 48.06267 | 0.041301 | 0.415596 | 0.698843  | 15.20479 | 18.0235  | 20.67853 | 31.4468  | 1388.74 |
| 169.9361 | -2329.56 | 670.4399 | 0.657563 | 33.32742 | 333.2742 | 48.2089  | 0.041413 | 0.415675 | 0.757905  | 15.10525 | 18.07834 | 20.77184 | 31.35739 | 1388.74 |
| 171.3504 | -2330.49 | 669.51   | 0.565725 | 29.49794 | 294.9794 | 48.367   | 0.041539 | 0.415764 | 0.489458  | 15.78651 | 18.13763 | 20.8634  | 31.26163 | 1388.74 |
| 172.7646 | -2331.29 | 668.71   | 0.550043 | 28.8127  | 288.127  | 48.46877 | 0.041675 | 0.415861 | 0.440889  | 15.92562 | 18.17579 | 20.95259 | 31.20324 | 1388.74 |
| 173.7646 | -2331.84 | 668.1599 | 0.26154  | 14.65686 | 146.5686 | 48.53345 | 0.041763 | 0.415923 | -0.560097 | 17.60779 | 18.20005 | 21.01224 | 31.16632 | 1388.74 |
| 175.1788 | -2332.21 | 667.79   | 0.9759   | 44.30119 | 443.0119 | 48.4174  | 0.041818 | 0.415963 | 1.502755  | 12.99423 | 18.15652 | 21.10466 | 31.24399 | 1388.74 |
| 176.593  | -2333.59 | 666.4099 | 0.600939 | 31.00329 | 310.0329 | 48.72953 | 0.041718 | 0.415892 | 0.59479   | 15.66297 | 18.27357 | 21.20336 | 31.03857 | 1388.74 |
| 178.0072 | -2334.44 | 665.5601 | 0.530029 | 27.9249  | 279.249  | 48.85228 | 0.041987 | 0.416083 | 0.377546  | 16.18651 | 18.3196  | 21.29217 | 30.97478 | 1388.74 |
| 179.0072 | -2334.97 | 665.03   | 0.431412 | 23.33596 | 233.3596 | 48.90724 | 0.042093 | 0.416157 | 0.052526  | 16.83995 | 18.34021 | 21.35272 | 30.94554 | 1388.74 |
| 180.4214 | -2335.58 | 664.4199 | 0.699951 | 34.99014 | 349.9014 | 48.91804 | 0.04214  | 0.416191 | 0.871765  | 15.02855 | 18.34426 | 21.44148 | 30.9412  | 1388.74 |
| 181.4214 | -2336.28 | 663.72   | 0.36771  | 20.18899 | 201.8899 | 49.04476 | 0.04215  | 0.416198 | -0.170656 | 17.26178 | 18.39179 | 21.50341 | 30.86174 | 1388.74 |
| 182.8356 | -2336.8  | 663.2    | 0.657563 | 33.32742 | 333.2742 | 49.00977 | 0.042259 | 0.416275 | 0.756025  | 15.35619 | 18.37866 | 21.59013 | 30.8895  | 1388.74 |
| 184.2498 | -2337.73 | 662.27   | 0.530331 | 27.93841 | 279.3841 | 49.1649  | 0.042229 | 0.416254 | 0.377934  | 16.28806 | 18.43684 | 21.67951 | 30.79046 | 1388.74 |
| 185.664  | -2338.48 | 661.52   | 0.537409 | 28.254   | 282.54   | 49.24221 | 0.042362 | 0.416348 | 0.399892  | 16.26577 | 18.46583 | 21.76639 | 30.7491  | 1388.74 |
| 187.0782 | -2339.24 | 660.76   | 0.480785 | 25.67757 | 256.7757 | 49.32388 | 0.042429 | 0.416395 | 0.217619  | 16.66987 | 18.49645 | 21.85227 | 30.70166 | 1388.74 |
| 188.4925 | -2339.92 | 660.0801 | 0.558643 | 29.18962 | 291.8962 | 49.36825 | 0.042499 | 0.416445 | 0.465528  | 16.16212 | 18.51309 | 21.93842 | 30.67773 | 1388.74 |
| 189.9067 | -2340.71 | 659.29   | 0.544487 | 28.56774 | 285.6774 | 49.46308 | 0.042538 | 0.416472 | 0.421613  | 16.2904  | 18.54865 | 22.02558 | 30.6209  | 1388.74 |
| 191.3209 | -2341.48 | 658.52   | 0.558643 | 29.18962 | 291.8962 | 49.5488  | 0.042619 | 0.416529 | 0.465251  | 16.22123 | 18.5808  | 22.11257 | 30.57215 | 1388.74 |
| 192.7351 | -2342.27 | 657.73   | 0.487863 | 26.00606 | 260.0606 | 49.64323 | 0.042693 | 0.416582 | 0.240242  | 16.73128 | 18.61621 | 22.19841 | 30.51782 | 1388.74 |
| 194.1493 | -2342.96 | 657.04   | 0.452646 | 24.3537  | 243.537  | 49.6919  | 0.042775 | 0.416639 | 0.123012  | 16.97631 | 18.63446 | 22.28232 | 30.49213 | 1388.74 |
| 195.5635 | -2343.6  | 656.3999 | 0.551397 | 28.8722  | 288.722  | 49.71679 | 0.042816 | 0.416668 | 0.44243   | 16.32635 | 18.6438  | 22.36725 | 30.47902 | 1388.74 |
| 196.9777 | -2344.38 | 655.6201 | 0.572799 | 29.80405 | 298.0405 | 49.80628 | 0.042838 | 0.416684 | 0.507999  | 16.20691 | 18.67736 | 22.45419 | 30.42536 | 1388.74 |
| 198.3919 | -2345.19 | 654.8101 | 0.579877 | 30.10847 | 301.0847 | 49.90886 | 0.042915 | 0.416738 | 0.529231  | 16.19063 | 18.71582 | 22.54149 | 30.36679 | 1388.74 |
| 199.8061 | -2346.01 | 653.99   | 0.586955 | 30.41103 | 304.1103 | 50.0155  | 0.043003 | 0.4168   | 0.550292  | 16.17532 | 18.75581 | 22.62888 | 30.30657 | 1388.74 |
| 201.2203 | -2346.84 | 653.1599 | 0.544487 | 28.56774 | 285.6774 | 50.12614 | 0.043095 | 0.416865 | 0.420318  | 16.50878 | 18.7973  | 22.71542 | 30.24436 | 1388.74 |
| 202.6345 | -2347.61 | 652.3899 | 0.480785 | 25.67757 | 256.7757 | 50.21047 | 0.043191 | 0.416932 | 0.215804  | 16.96951 | 18.82893 | 22.7999  | 30.19842 | 1388.74 |
| 204.0488 | -2348.29 | 651.71   | 0.502019 | 26.65754 | 266.5754 | 50.25369 | 0.043263 | 0.416983 | 0.284991  | 16.84197 | 18.84514 | 22.88355 | 30.17614 | 1388.74 |
| 205.463  | -2349    | 651      | 0.579877 | 30.10847 | 301.0847 | 50.31073 | 0.043301 | 0.417009 | 0.528351  | 16.321   | 18.86652 | 22.96884 | 30.14383 | 1388.74 |
| 206.8772 | -2349.82 | 650.1799 | 0.47998  | 25.6401  | 256.401  | 50.41634 | 0.04335  | 0.417044 | 0.212773  | 17.04444 | 18.90613 | 23.05361 | 30.08317 | 1388.74 |
| 207.8772 | -2350.3  | 649.7    | 0.862652 | 40.78275 | 407.8275 | 50.44635 | 0.043441 | 0.417108 | 1.265109  | 14.32408 | 18.91738 | 23.11737 | 30.06988 | 1388.74 |
| 209.2914 | -2351.52 | 648.48   | 0.369869 | 20.29789 | 202.9789 | 50.69855 | 0.043467 | 0.417126 | -0.166207 | 17.83135 | 19.01196 | 23.20533 | 29.9216  | 1388.74 |
| 210.2914 | -2351.89 | 648.1101 | 0.339571 | 18.75599 | 187.5599 | 50.67524 | 0.043684 | 0.417278 | -0.275928 | 17.99408 | 19.00321 | 23.26116 | 29.94631 | 1388.74 |
| 211.7056 | -2352.37 | 647.6299 | 0.438321 | 23.66883 | 236.6883 | 50.62048 | 0.043664 | 0.417264 | 0.07232   | 17.38588 | 18.98268 | 23.3411  | 29.97769 | 1388.74 |
| 213.1198 | -2352.99 | 647.01   | 0.516175 | 27.30167 | 273.0167 | 50.63485 | 0.043617 | 0.417231 | 0.329709  | 16.87287 | 18.98807 | 23.42366 | 29.96681 | 1388.74 |
| 214.534  | -2353.72 | 646.28   | 0.480785 | 25.67757 | 256.7757 | 50.70033 | 0.043629 | 0.41724  | 0.214764  | 17.13506 | 19.01262 | 23.50683 | 29.92873 | 1388.74 |
| 215.9482 | -2354.4  | 645.6001 | 0.495114 | 26.34066 | 263.4066 | 50.74293 | 0.043685 | 0.417279 | 0.261575  | 17.05289 | 19.0286  | 23.58956 | 29.90643 | 1388.74 |
| 217.3624 | -2355.1  | 644.8999 | 0.46663  | 25.01514 | 250.1514 | 50.79477 | 0.043722 | 0.417305 | 0.167617  | 17.26126 | 19.04804 | 23.67199 | 29.87775 | 1388.74 |
| 218.7766 | -2355.76 | 644.24   | 0.657563 | 33.32742 | 333.2742 | 50.82796 | 0.043767 | 0.417336 | 0.752699  | 15.92588 | 19.06048 | 23.75722 | 29.86049 | 1388.74 |
| 220.1909 | -2356.69 | 643.3101 | 0.480958 | 25.68561 | 256.8561 | 50.97688 | 0.043795 | 0.417356 | 0.214939  | 17.22737 | 19.11633 | 23.84253 | 29.77468 | 1388.74 |
| 221.6051 | -2357.37 | 642.6299 | 0.537237 | 28.24633 | 282.4633 | 51.01929 | 0.043924 | 0.417446 | 0.395723  | 16.85399 | 19.13223 | 23.92552 | 29.75634 | 1388.74 |
| 223.0193 | -2358.13 | 641.8701 | 0.523426 | 27.62873 | 276.2873 | 51.09729 | 0.04396  | 0.417472 | 0.352022  | 16.97652 | 19.16148 | 24.00913 | 29.71273 | 1388.74 |
| 224.4335 | -2358.87 | 641.1299 | 0.600939 | 31.00329 | 310.0329 | 51.16657 | 0.044027 | 0.417519 | 0.589561  | 16.4463  | 19.18746 | 24.09375 | 29.67584 | 1388.74 |
| 225.8477 | -2359.72 | 640.28   | 0.544487 | 28.56774 | 285.6774 | 51.28245 | 0.044087 | 0.41756  | 0.418027  | 16.8896  | 19.23092 | 24.1786  | 29.61175 | 1388.74 |
| 227.2619 | -2360.49 | 639.51   | 0.509097 | 26.98053 | 269.8053 | 51.36442 | 0.044187 | 0.41763  | 0.30567   | 17.16523 | 19.26166 | 24.26165 | 29.56943 | 1388.74 |
| 228.6761 | -2361.21 | 638.79   | 0.77002  | 37.59697 | 375.9697 | 51.42427 | 0.044258 | 0.41768  | 1.046875  | 15.27921 | 19.2841  | 24.34883 | 29.53851 | 1388.74 |
| 229.6761 | -2361.98 | 638.02   | 0.346476 | 19.10999 | 191.0999 | 51.56903 | 0.044309 | 0.417716 | -0.252425 | 18.27269 | 19.33839 | 24.40844 | 29.45813 | 1388.74 |
| 231.0903 | -2362.47 | 637.53   | 0.381866 | 20.90017 | 209.0017 | 51.51981 | 0.044434 | 0.417803 | -0.125895 | 18.04874 | 19.31993 | 24.48631 | 29.49242 | 1388.74 |

|          |          |          |          |          |          |          |          |          |           |          |          |          |          |         |
|----------|----------|----------|----------|----------|----------|----------|----------|----------|-----------|----------|----------|----------|----------|---------|
| 232.5045 | -2363.01 | 636.99   | 0.742499 | 36.59383 | 365.9383 | 51.49523 | 0.044391 | 0.417773 | 0.977685  | 15.50422 | 19.31071 | 24.57061 | 29.5044  | 1388.74 |
| 233.9187 | -2364.06 | 635.9399 | 0.579705 | 30.10107 | 301.0107 | 51.68617 | 0.04437  | 0.417758 | 0.5254    | 16.76845 | 19.38231 | 24.65825 | 29.39437 | 1388.74 |
| 235.333  | -2364.88 | 635.1201 | 0.640137 | 32.6248  | 326.248  | 51.7884  | 0.044535 | 0.417873 | 0.70198   | 16.35644 | 19.42065 | 24.74364 | 29.34441 | 1388.74 |
| 236.333  | -2365.52 | 634.48   | 0.560053 | 29.25114 | 292.5114 | 51.88478 | 0.044623 | 0.417934 | 0.464987  | 16.97579 | 19.45679 | 24.80364 | 29.2942  | 1388.74 |
| 237.333  | -2366.08 | 633.9199 | 0.431243 | 23.32776 | 233.2776 | 51.94851 | 0.044706 | 0.417992 | 0.045627  | 17.88824 | 19.48069 | 24.86101 | 29.26231 | 1388.74 |
| 238.7472 | -2366.69 | 633.3101 | 0.346476 | 19.10999 | 191.0999 | 51.95735 | 0.044761 | 0.418031 | -0.253541 | 18.41028 | 19.48401 | 24.93893 | 29.26001 | 1388.74 |
| 240.1614 | -2367.18 | 632.8201 | 0.657735 | 33.33433 | 333.3433 | 51.90827 | 0.044768 | 0.418036 | 0.750989  | 16.26309 | 19.4656  | 25.0205  | 29.28805 | 1388.74 |
| 241.5756 | -2368.11 | 631.8899 | 0.829826 | 39.68676 | 396.8676 | 52.05377 | 0.044726 | 0.418006 | 1.188429  | 15.02169 | 19.52016 | 25.11091 | 29.20413 | 1388.74 |
| 242.5756 | -2368.94 | 631.0601 | 0.390137 | 21.31258 | 213.1258 | 52.21612 | 0.044852 | 0.418094 | -0.097669 | 18.24193 | 19.58105 | 25.17103 | 29.1194  | 1388.74 |
| 243.5756 | -2369.33 | 630.6699 | 0.280029 | 15.6438  | 156.438  | 52.20282 | 0.044991 | 0.418191 | -0.498914 | 18.8509  | 19.57606 | 25.22495 | 29.1336  | 1388.74 |
| 244.5756 | -2369.61 | 630.3899 | 0.789795 | 38.3015  | 383.015  | 52.13486 | 0.04498  | 0.418183 | 1.093598  | 15.34251 | 19.55057 | 25.28344 | 29.17102 | 1388.74 |
| 245.5756 | -2370.4  | 629.6001 | 0.430176 | 23.2762  | 232.762  | 52.28402 | 0.044921 | 0.418142 | 0.041453  | 18.01075 | 19.60651 | 25.34341 | 29.08497 | 1388.74 |
| 246.5756 | -2370.83 | 629.1699 | 0.247384 | 13.89511 | 138.9511 | 52.28966 | 0.04505  | 0.418232 | -0.621929 | 19.03482 | 19.60862 | 25.3974  | 29.08805 | 1388.74 |
| 247.9898 | -2371.18 | 628.8201 | 0.770012 | 37.5967  | 375.967  | 52.17005 | 0.045055 | 0.418235 | 1.045206  | 15.50086 | 19.56377 | 25.47929 | 29.15497 | 1388.74 |
| 248.9898 | -2371.95 | 628.05   | 0.219244 | 12.36607 | 123.6607 | 52.31252 | 0.044952 | 0.418163 | -0.728643 | 19.16206 | 19.61719 | 25.53699 | 29.07059 | 1388.74 |
| 250.404  | -2372.26 | 627.74   | 0.480785 | 25.67757 | 256.7757 | 52.17244 | 0.045074 | 0.418249 | 0.211354  | 17.63259 | 19.56467 | 25.61386 | 29.15459 | 1388.74 |
| 251.8182 | -2372.94 | 627.0601 | 0.445568 | 24.01623 | 240.1623 | 52.21318 | 0.044954 | 0.418165 | 0.093866  | 17.88491 | 19.57994 | 25.6935  | 29.126   | 1388.74 |
| 253.2325 | -2373.57 | 626.4299 | 0.452474 | 24.34549 | 243.4549 | 52.23126 | 0.044989 | 0.418189 | 0.117133  | 17.845   | 19.58672 | 25.77266 | 29.11761 | 1388.74 |
| 254.6467 | -2374.21 | 625.79   | 0.487863 | 26.00606 | 260.0606 | 52.25381 | 0.045004 | 0.4182   | 0.234787  | 17.61112 | 19.59518 | 25.85243 | 29.1058  | 1388.74 |
| 256.0609 | -2374.9  | 625.1001 | 0.551565 | 28.87961 | 288.7961 | 52.299   | 0.045024 | 0.418214 | 0.437879  | 17.17309 | 19.61213 | 25.93375 | 29.08159 | 1388.74 |
| 257.4751 | -2375.68 | 624.3201 | 0.560064 | 29.25163 | 292.5163 | 52.3832  | 0.045063 | 0.418241 | 0.464019  | 17.13878 | 19.6437  | 26.01618 | 29.03673 | 1388.74 |
| 258.4751 | -2376.24 | 623.76   | 0.54005  | 28.37126 | 283.7126 | 52.44619 | 0.045135 | 0.418291 | 0.401752  | 17.30502 | 19.66732 | 26.07424 | 29.00535 | 1388.74 |
| 259.4751 | -2376.78 | 623.22   | 0.540044 | 28.37102 | 283.7102 | 52.50066 | 0.04519  | 0.418329 | 0.401611  | 17.32303 | 19.68775 | 26.132   | 28.97786 | 1388.74 |
| 260.475  | -2377.32 | 622.6799 | 0.480785 | 25.67757 | 256.7757 | 52.55506 | 0.045237 | 0.418361 | 0.210973  | 17.7619  | 19.70815 | 26.189   | 28.95013 | 1388.74 |
| 261.8893 | -2378    | 622      | 0.452474 | 24.34549 | 243.4549 | 52.59543 | 0.045283 | 0.418394 | 0.116434  | 17.96942 | 19.72329 | 26.26816 | 28.93015 | 1388.74 |
| 263.3035 | -2378.64 | 621.3601 | 0.502192 | 26.66544 | 266.6544 | 52.61769 | 0.045318 | 0.418418 | 0.28074   | 17.63302 | 19.73164 | 26.34761 | 28.91958 | 1388.74 |
| 264.7177 | -2379.35 | 620.6499 | 0.537409 | 28.254   | 282.54   | 52.67135 | 0.045337 | 0.418431 | 0.39301   | 17.39849 | 19.75176 | 26.42835 | 28.89104 | 1388.74 |
| 266.1319 | -2380.11 | 619.8899 | 0.544315 | 28.56011 | 285.6011 | 52.74639 | 0.045384 | 0.418463 | 0.414515  | 17.373   | 19.7799  | 26.50969 | 28.85215 | 1388.74 |
| 267.5461 | -2380.88 | 619.1201 | 0.586955 | 30.41103 | 304.1103 | 52.82542 | 0.045448 | 0.418508 | 0.544768  | 17.08406 | 19.80953 | 26.59177 | 28.81207 | 1388.74 |
| 268.9603 | -2381.71 | 618.29   | 0.558643 | 29.18962 | 291.8962 | 52.92913 | 0.045516 | 0.418555 | 0.458618  | 17.32788 | 19.84842 | 26.67397 | 28.75886 | 1388.74 |
| 270.3745 | -2382.5  | 617.5    | 0.473707 | 25.34727 | 253.4727 | 53.01627 | 0.045606 | 0.418617 | 0.1867    | 17.96714 | 19.8811  | 26.7541  | 28.71584 | 1388.74 |
| 271.7887 | -2383.17 | 616.8301 | 0.56007  | 29.25187 | 292.5187 | 53.05168 | 0.045681 | 0.418669 | 0.462634  | 17.35745 | 19.89438 | 26.83417 | 28.70024 | 1388.74 |
| 272.7887 | -2383.73 | 616.27   | 0.487863 | 26.00606 | 260.0606 | 53.11369 | 0.045711 | 0.41869  | 0.233134  | 17.90093 | 19.91764 | 26.8909  | 28.66817 | 1388.74 |
| 274.2029 | -2384.42 | 615.5801 | 0.520025 | 27.47555 | 274.7555 | 53.15784 | 0.045765 | 0.418727 | 0.337019  | 17.68577 | 19.93419 | 26.97038 | 28.6469  | 1388.74 |
| 275.2029 | -2384.94 | 615.0601 | 0.479985 | 25.64032 | 256.4032 | 53.20292 | 0.045803 | 0.418754 | 0.207007  | 17.98648 | 19.95109 | 27.02644 | 28.62442 | 1388.74 |
| 276.2029 | -2385.42 | 614.5801 | 0.247557 | 13.90443 | 139.0443 | 53.23059 | 0.045842 | 0.418781 | -0.623274 | 19.37656 | 19.96147 | 27.07997 | 28.61138 | 1388.74 |
| 277.6171 | -2385.77 | 614.23   | 0.381866 | 20.90017 | 209.0017 | 53.11284 | 0.045866 | 0.418797 | -0.129379 | 18.60682 | 19.91731 | 27.15443 | 28.67594 | 1388.74 |
| 279.0313 | -2386.31 | 613.6899 | 0.800065 | 38.66207 | 386.6207 | 53.08834 | 0.045764 | 0.418727 | 1.11662   | 15.54514 | 19.90813 | 27.23725 | 28.68437 | 1388.74 |
| 280.0313 | -2387.11 | 612.8899 | 0.346476 | 19.10999 | 191.0999 | 53.23791 | 0.045743 | 0.418712 | -0.255957 | 18.86402 | 19.96421 | 27.29538 | 28.60278 | 1388.74 |
| 281.4455 | -2387.6  | 612.3999 | 0.55982  | 29.24098 | 292.4098 | 53.18955 | 0.045872 | 0.418802 | 0.461434  | 17.40441 | 19.94608 | 27.37336 | 28.63488 | 1388.74 |
| 282.4455 | -2388.16 | 611.8401 | 0.479985 | 25.64032 | 256.4032 | 53.25125 | 0.04583  | 0.418773 | 0.206943  | 18.00281 | 19.96922 | 27.42985 | 28.59974 | 1388.74 |
| 283.4455 | -2388.64 | 611.3601 | 0.297103 | 16.54684 | 165.4684 | 53.27888 | 0.045883 | 0.418809 | -0.437499 | 19.15217 | 19.97958 | 27.48367 | 28.58741 | 1388.74 |
| 284.8597 | -2389.06 | 610.9399 | 0.537409 | 28.254   | 282.54   | 53.1963  | 0.045907 | 0.418826 | 0.391707  | 17.57189 | 19.94861 | 27.56069 | 28.63292 | 1388.74 |
| 286.2739 | -2389.82 | 610.1799 | 0.40992  | 22.28972 | 222.8972 | 53.27035 | 0.045836 | 0.418777 | -0.03073  | 18.4837  | 19.97638 | 27.63914 | 28.58975 | 1388.74 |
| 287.2739 | -2390.23 | 609.77   | 0.523253 | 27.62097 | 276.2097 | 53.26625 | 0.0459   | 0.418821 | 0.346991  | 17.69839 | 19.97484 | 27.69441 | 28.59497 | 1388.74 |
| 288.6881 | -2390.97 | 609.03   | 0.558643 | 29.18962 | 291.8962 | 53.33176 | 0.045896 | 0.418818 | 0.457758  | 17.45969 | 19.99941 | 27.77486 | 28.55968 | 1388.74 |
| 290.1023 | -2391.76 | 608.24   | 0.494941 | 26.33272 | 263.3272 | 53.41808 | 0.045953 | 0.418857 | 0.255709  | 17.95315 | 20.03178 | 27.85473 | 28.51618 | 1388.74 |
| 291.5165 | -2392.46 | 607.54   | 0.509097 | 26.98053 | 269.8053 | 53.46622 | 0.046027 | 0.418909 | 0.301397  | 17.86762 | 20.04983 | 27.93369 | 28.494   | 1388.74 |
| 292.9307 | -2393.18 | 606.8201 | 0.509097 | 26.98053 | 269.8053 | 53.52291 | 0.046069 | 0.418937 | 0.301301  | 17.88657 | 20.07109 | 28.0128  | 28.46577 | 1388.74 |
| 294.3449 | -2393.9  | 606.1001 | 0.488036 | 26.01405 | 260.1405 | 53.57952 | 0.046117 | 0.418971 | 0.232754  | 18.0567  | 20.09232 | 28.09149 | 28.43798 | 1388.74 |
| 295.7591 | -2394.59 | 605.4099 | 0.502019 | 26.65754 | 266.5754 | 53.62321 | 0.046166 | 0.419005 | 0.278214  | 17.97123 | 20.1087  | 28.17    | 28.4171  | 1388.74 |
| 297.1734 | -2395.3  | 604.7    | 0.502019 | 26.65754 | 266.5754 | 53.67539 | 0.046204 | 0.419031 | 0.278127  | 17.98872 | 20.12827 | 28.24865 | 28.39124 | 1388.74 |
| 298.5876 | -2396.01 | 603.99   | 0.523253 | 27.62097 | 276.2097 | 53.7275  | 0.046249 | 0.419062 | 0.34619   | 17.85164 | 20.14781 | 28.32757 | 28.3658  | 1388.74 |
| 300.0018 | -2396.75 | 603.25   | 0.502019 | 26.65754 | 266.5754 | 53.79229 | 0.046294 | 0.419093 | 0.277919  | 18.0279  | 20.17211 | 28.4064  | 28.33372 | 1388.74 |
| 301.416  | -2397.46 | 602.54   | 0.572799 | 29.80405 | 298.0405 | 53.84425 | 0.04635  | 0.419131 | 0.500034  | 17.52086 | 20.19159 | 28.48596 | 28.30898 | 1388.74 |
| 302.8302 | -2398.27 | 601.73   | 0.601111 | 31.01055 | 310.1055 | 53.93764 | 0.046394 | 0.419162 | 0.584788  | 17.33568 | 20.22662 | 28.56711 | 28.26205 | 1388.74 |
| 304.2444 | -2399.12 | 600.8799 | 0.480785 | 25.67757 | 256.7757 | 54.04668 | 0.046475 | 0.419218 | 0.208079  | 18.26602 | 20.2675  | 28.64656 | 28.20876 | 1388.74 |
| 305.6586 | -2399.8  | 600.2    | 0.473707 | 25.34727 | 253.4727 | 54.0854  | 0.046569 | 0.419282 | 0.184446  | 18.32947 | 20.28202 | 28.72384 | 28.19292 | 1388.74 |
| 307.0728 | -2400.47 | 599.53   | 0.494941 | 26.33272 | 263.3272 | 54.11969 | 0.046602 | 0.419305 | 0.254203  | 18.18895 | 20.29488 | 28.8013  | 28.1766  | 1388.74 |
| 308.487  | -2401.17 | 598.8301 | 0.523253 | 27.62097 | 276.2097 | 54.16693 | 0.046632 | 0.419326 | 0.345313  | 17.99765 | 20.3126  | 28.87946 | 28.15339 | 1388.74 |

|          |          |          |          |          |          |          |          |          |           |          |          |          |          |         |
|----------|----------|----------|----------|----------|----------|----------|----------|----------|-----------|----------|----------|----------|----------|---------|
| 309.9012 | -2401.91 | 598.0901 | 0.601111 | 31.01055 | 310.1055 | 54.23104 | 0.046672 | 0.419354 | 0.584173  | 17.42997 | 20.33664 | 28.95929 | 28.12199 | 1388.74 |
| 311.3155 | -2402.76 | 597.24   | 0.551565 | 28.87961 | 288.7961 | 54.33937 | 0.046728 | 0.419392 | 0.43401   | 17.84307 | 20.37726 | 29.03948 | 28.06847 | 1388.74 |
| 312.7297 | -2403.54 | 596.46   | 0.494941 | 26.33272 | 263.3272 | 54.41969 | 0.046821 | 0.419456 | 0.253697  | 18.28978 | 20.40738 | 29.11776 | 28.03133 | 1388.74 |
| 314.1439 | -2404.24 | 595.76   | 0.473707 | 25.34727 | 253.4727 | 54.46657 | 0.04689  | 0.419504 | 0.183697  | 18.45865 | 20.42496 | 29.19473 | 28.01038 | 1388.74 |
| 315.5581 | -2404.91 | 595.0901 | 0.459724 | 24.68938 | 246.8938 | 54.50049 | 0.046931 | 0.419531 | 0.136945  | 18.56938 | 20.43768 | 29.27111 | 27.9948  | 1388.74 |
| 316.9723 | -2405.56 | 594.4399 | 0.558643 | 29.18962 | 291.8962 | 54.52576 | 0.04696  | 0.419551 | 0.455358  | 17.85058 | 20.44716 | 29.34877 | 27.98317 | 1388.74 |
| 318.3865 | -2406.35 | 593.6499 | 0.565553 | 29.49045 | 294.9045 | 54.60974 | 0.046982 | 0.419566 | 0.47652   | 17.82539 | 20.47865 | 29.42805 | 27.94113 | 1388.74 |
| 319.8007 | -2407.15 | 592.8501 | 0.594033 | 30.71172 | 307.1172 | 54.6975  | 0.047054 | 0.419616 | 0.562331  | 17.63477 | 20.51156 | 29.50782 | 27.8996  | 1388.74 |
| 321.2149 | -2407.99 | 592.01   | 0.565721 | 29.49777 | 294.9777 | 54.80089 | 0.047129 | 0.419668 | 0.476705  | 17.88649 | 20.55033 | 29.58744 | 27.85041 | 1388.74 |
| 322.6291 | -2408.79 | 591.21   | 0.770638 | 37.61921 | 376.1921 | 54.88837 | 0.047219 | 0.419729 | 1.042311  | 16.3036  | 20.58314 | 29.67017 | 27.81007 | 1388.74 |
| 324.0433 | -2409.88 | 590.1201 | 0.240237 | 13.50856 | 135.0856 | 55.07934 | 0.047294 | 0.419781 | -0.654663 | 20.08334 | 20.65475 | 29.7479  | 27.71706 | 1388.74 |
| 325.0433 | -2410.12 | 589.8799 | 0.318164 | 17.64921 | 176.4921 | 54.99482 | 0.047458 | 0.419893 | -0.363528 | 19.65234 | 20.62306 | 29.79823 | 27.76712 | 1388.74 |
| 326.4575 | -2410.57 | 589.4299 | 0.537409 | 28.254   | 282.54   | 54.92834 | 0.047386 | 0.419844 | 0.388345  | 18.14402 | 20.59813 | 29.87307 | 27.79742 | 1388.74 |
| 327.8717 | -2411.33 | 588.6699 | 0.664641 | 33.60963 | 336.0963 | 54.99944 | 0.047328 | 0.419804 | 0.76465   | 17.17691 | 20.62479 | 29.95314 | 27.75889 | 1388.74 |
| 329.286  | -2412.27 | 587.73   | 0.622173 | 31.88874 | 318.8874 | 55.13926 | 0.04739  | 0.419846 | 0.644214  | 17.55652 | 20.67722 | 30.03458 | 27.69127 | 1388.74 |
| 330.7002 | -2413.15 | 586.8501 | 0.660163 | 33.43131 | 334.3131 | 55.25675 | 0.04751  | 0.419929 | 0.751825  | 17.29288 | 20.72128 | 30.11574 | 27.63782 | 1388.74 |
| 331.7002 | -2413.81 | 586.1899 | 0.159915 | 9.085546 | 90.85546 | 55.35351 | 0.047611 | 0.419998 | -0.963074 | 20.49713 | 20.75756 | 30.16866 | 27.59406 | 1388.74 |
| 332.7001 | -2413.97 | 586.03   | 0.212167 | 11.97865 | 119.7865 | 55.22979 | 0.047695 | 0.420055 | -0.762605 | 20.26018 | 20.71117 | 30.21773 | 27.65963 | 1388.74 |
| 334.1143 | -2414.27 | 585.73   | 0.714187 | 35.53392 | 355.3392 | 55.09093 | 0.047588 | 0.419982 | 0.897807  | 16.81179 | 20.6591  | 30.29403 | 27.72453 | 1388.74 |
| 335.5286 | -2415.28 | 584.72   | 0.479985 | 25.64032 | 256.4032 | 55.25482 | 0.047468 | 0.4199   | 0.203131  | 18.68017 | 20.72056 | 30.37372 | 27.63691 | 1388.74 |
| 336.5285 | -2415.76 | 584.24   | 0.4031   | 21.95437 | 219.5437 | 55.28096 | 0.04761  | 0.419997 | -0.058768 | 19.22703 | 20.73036 | 30.42648 | 27.6302  | 1388.74 |
| 337.9428 | -2416.33 | 583.6699 | 0.540044 | 28.37102 | 283.7102 | 55.27027 | 0.047632 | 0.420012 | 0.396056  | 18.23689 | 20.72635 | 30.50198 | 27.63656 | 1388.74 |
| 338.9427 | -2416.87 | 583.1299 | 0.480785 | 25.67757 | 256.7757 | 55.32122 | 0.047623 | 0.420006 | 0.205415  | 18.69678 | 20.74546 | 30.55613 | 27.61069 | 1388.74 |
| 340.357  | -2417.55 | 582.45   | 0.43124  | 23.32762 | 233.2762 | 55.35856 | 0.047667 | 0.420036 | 0.038579  | 19.06249 | 20.75946 | 30.63103 | 27.59404 | 1388.74 |
| 341.7712 | -2418.16 | 581.8401 | 0.229985 | 12.95195 | 129.5195 | 55.36557 | 0.047699 | 0.420058 | -0.69464  | 20.23387 | 20.76209 | 30.70301 | 27.59199 | 1388.74 |
| 342.7711 | -2418.39 | 581.6101 | 0.330081 | 18.2671  | 182.671  | 55.27636 | 0.047705 | 0.420062 | -0.320424 | 19.68403 | 20.72863 | 30.75311 | 27.63679 | 1388.74 |
| 343.7711 | -2418.72 | 581.28   | 0.390141 | 21.31278 | 213.1278 | 55.23513 | 0.047628 | 0.42001  | -0.104349 | 19.29661 | 20.71318 | 30.80442 | 27.65396 | 1388.74 |
| 344.7711 | -2419.11 | 580.8899 | 0.381694 | 20.89154 | 208.9154 | 55.2217  | 0.047593 | 0.419985 | -0.134154 | 19.34673 | 20.70814 | 30.85617 | 27.65908 | 1388.74 |
| 346.1853 | -2419.65 | 580.3501 | 0.830095 | 39.69589 | 396.9589 | 55.19727 | 0.047581 | 0.419977 | 1.183361  | 15.92673 | 20.69898 | 30.93636 | 27.6708  | 1388.74 |
| 347.1853 | -2420.48 | 579.52   | 0.250003 | 14.03638 | 140.3638 | 55.34972 | 0.04756  | 0.419963 | -0.618322 | 20.13641 | 20.75615 | 30.99182 | 27.59364 | 1388.74 |
| 348.1853 | -2420.73 | 579.27   | 0.424334 | 22.99317 | 229.9317 | 55.27028 | 0.047691 | 0.420053 | 0.014779  | 19.07968 | 20.72636 | 31.04281 | 27.63922 | 1388.74 |
| 349.5995 | -2421.33 | 578.6699 | 0.26154  | 14.65685 | 146.5685 | 55.27297 | 0.047623 | 0.420006 | -0.574909 | 20.05287 | 20.72736 | 31.11509 | 27.63479 | 1388.74 |
| 351.0137 | -2421.7  | 578.3    | 0.643579 | 32.76449 | 327.6449 | 55.16837 | 0.047625 | 0.420008 | 0.705007  | 17.3967  | 20.68814 | 31.19062 | 27.68729 | 1388.74 |
| 352.4279 | -2422.61 | 577.3899 | 0.516175 | 27.30167 | 273.0167 | 55.29688 | 0.047535 | 0.419946 | 0.320662  | 18.42638 | 20.73633 | 31.26957 | 27.61889 | 1388.74 |
| 353.8421 | -2423.34 | 576.6599 | 0.59986  | 30.95784 | 309.5784 | 55.3552  | 0.047646 | 0.420022 | 0.578322  | 17.80111 | 20.7582  | 31.34765 | 27.59477 | 1388.74 |
| 354.8421 | -2423.94 | 576.0601 | 0.61012  | 31.38819 | 313.8819 | 55.42949 | 0.047696 | 0.420056 | 0.608435  | 17.74419 | 20.78606 | 31.40391 | 27.56004 | 1388.74 |
| 355.8421 | -2424.55 | 575.45   | 0.318164 | 17.64921 | 176.4921 | 55.50755 | 0.04776  | 0.4201   | -0.364266 | 19.83557 | 20.81533 | 31.45713 | 27.52415 | 1388.74 |
| 357.2563 | -2425    | 575      | 0.480785 | 25.67757 | 256.7757 | 55.44155 | 0.047827 | 0.420146 | 0.204942  | 18.73744 | 20.79058 | 31.53046 | 27.55993 | 1388.74 |
| 358.6705 | -2425.68 | 574.3201 | 0.43849  | 23.67698 | 236.7698 | 55.47873 | 0.047771 | 0.420107 | 0.063134  | 19.05328 | 20.80452 | 31.6053  | 27.53892 | 1388.74 |
| 360.0847 | -2426.3  | 573.7    | 0.480785 | 25.67757 | 256.7757 | 55.49017 | 0.047803 | 0.420129 | 0.205     | 18.75388 | 20.80881 | 31.68011 | 27.53467 | 1388.74 |
| 361.499  | -2426.98 | 573.02   | 0.459552 | 24.68122 | 246.8122 | 55.52733 | 0.047812 | 0.420136 | 0.134307  | 18.92049 | 20.82275 | 31.75519 | 27.51669 | 1388.74 |
| 362.9132 | -2427.63 | 572.3701 | 0.530035 | 27.92514 | 279.2514 | 55.55165 | 0.047844 | 0.420157 | 0.364061  | 18.40621 | 20.83187 | 31.83096 | 27.50607 | 1388.74 |
| 363.9132 | -2428.16 | 571.8401 | 0.551565 | 28.87961 | 288.7961 | 55.59825 | 0.047865 | 0.420172 | 0.431449  | 18.25645 | 20.84934 | 31.88552 | 27.48395 | 1388.74 |
| 365.3274 | -2428.94 | 571.0601 | 0.445568 | 24.01623 | 240.1623 | 55.67629 | 0.047906 | 0.420199 | 0.086898  | 19.07115 | 20.87861 | 31.96129 | 27.44722 | 1388.74 |
| 366.7416 | -2429.57 | 570.4299 | 0.502019 | 26.65754 | 266.5754 | 55.69199 | 0.047973 | 0.420245 | 0.274058  | 18.66456 | 20.8845  | 32.03624 | 27.44248 | 1388.74 |
| 368.1558 | -2430.28 | 569.72   | 0.480785 | 25.67757 | 256.7757 | 55.74148 | 0.047986 | 0.420254 | 0.204575  | 18.83881 | 20.90305 | 32.11166 | 27.41872 | 1388.74 |
| 369.57   | -2430.96 | 569.04   | 0.516175 | 27.30167 | 273.0167 | 55.77839 | 0.048029 | 0.420283 | 0.319537  | 18.58683 | 20.91689 | 32.18723 | 27.40248 | 1388.74 |
| 370.9842 | -2431.69 | 568.3101 | 0.516175 | 27.30167 | 273.0167 | 55.836   | 0.048061 | 0.420305 | 0.319465  | 18.60603 | 20.9385  | 32.26328 | 27.37562 | 1388.74 |
| 372.3984 | -2432.42 | 567.5801 | 0.544487 | 28.56774 | 285.6774 | 55.89354 | 0.04811  | 0.420339 | 0.408876  | 18.40824 | 20.96008 | 32.3397  | 27.34964 | 1388.74 |
| 373.8126 | -2433.19 | 566.8101 | 0.636501 | 32.47681 | 324.7681 | 55.9671  | 0.04816  | 0.420373 | 0.683729  | 17.70538 | 20.98766 | 32.41802 | 27.31589 | 1388.74 |
| 375.2268 | -2434.09 | 565.9099 | 0.539806 | 28.36043 | 283.6043 | 56.08996 | 0.048223 | 0.420416 | 0.393975  | 18.5092  | 21.03373 | 32.49612 | 27.25886 | 1388.74 |
| 376.2268 | -2434.63 | 565.3701 | 0.212167 | 11.97865 | 119.7865 | 56.13991 | 0.048329 | 0.420488 | -0.764193 | 20.59405 | 21.05247 | 32.54726 | 27.23928 | 1388.74 |
| 377.641  | -2434.93 | 565.0701 | 0.880136 | 41.35216 | 413.5216 | 56.00301 | 0.048372 | 0.420518 | 1.293819  | 15.76477 | 21.00113 | 32.62506 | 27.30776 | 1388.74 |
| 378.641  | -2435.81 | 564.1899 | 0.530331 | 27.93841 | 279.3841 | 56.1673  | 0.048254 | 0.420437 | 0.364074  | 18.60791 | 21.06274 | 32.68324 | 27.22269 | 1388.74 |
| 380.0552 | -2436.56 | 563.4399 | 0.311086 | 17.2802  | 172.802  | 56.23248 | 0.048396 | 0.420534 | -0.391902 | 20.13538 | 21.08718 | 32.75624 | 27.19737 | 1388.74 |
| 381.4694 | -2437    | 563      | 0.530331 | 27.93841 | 279.3841 | 56.1624  | 0.048452 | 0.420572 | 0.363627  | 18.60629 | 21.0609  | 32.82925 | 27.23378 | 1388.74 |
| 382.8836 | -2437.75 | 562.25   | 0.487863 | 26.00606 | 260.0606 | 56.22751 | 0.048392 | 0.420531 | 0.226932  | 18.95038 | 21.08532 | 32.90456 | 27.19959 | 1388.74 |
| 384.2979 | -2438.44 | 561.5601 | 0.487863 | 26.00606 | 260.0606 | 56.2681  | 0.048448 | 0.420569 | 0.226803  | 18.96406 | 21.10054 | 32.97916 | 27.18244 | 1388.74 |
| 385.7121 | -2439.13 | 560.8701 | 0.466802 | 25.02327 | 250.2327 | 56.30863 | 0.048483 | 0.420593 | 0.15702   | 19.13373 | 21.11574 | 33.0534  | 27.16441 | 1388.74 |
| 387.1263 | -2439.79 | 560.21   | 0.558643 | 29.18962 | 291.8962 | 56.33668 | 0.048518 | 0.420616 | 0.451871  | 18.44344 | 21.12625 | 33.12867 | 27.15242 | 1388.74 |

|          |          |          |          |          |          |          |          |          |           |          |          |          |          |         |
|----------|----------|----------|----------|----------|----------|----------|----------|----------|-----------|----------|----------|----------|----------|---------|
| 388.5405 | -2440.58 | 559.4199 | 0.530331 | 27.93841 | 279.3841 | 56.41734 | 0.048542 | 0.420633 | 0.363425  | 18.69075 | 21.1565  | 33.20484 | 27.11466 | 1388.74 |
| 389.9547 | -2441.33 | 558.6699 | 0.459552 | 24.68122 | 246.8122 | 56.48212 | 0.048611 | 0.42068  | 0.132451  | 19.24583 | 21.1808  | 33.2794  | 27.0866  | 1388.74 |
| 391.3689 | -2441.98 | 558.02   | 0.586955 | 30.41103 | 304.1103 | 56.5057  | 0.048667 | 0.420718 | 0.537621  | 18.27429 | 21.18964 | 33.35478 | 27.07774 | 1388.74 |
| 392.7831 | -2442.81 | 557.1899 | 0.466633 | 25.0153  | 250.153  | 56.60139 | 0.048687 | 0.420732 | 0.155982  | 19.23446 | 21.22552 | 33.43019 | 27.03285 | 1388.74 |
| 394.1973 | -2443.47 | 556.53   | 0.445568 | 24.01623 | 240.1623 | 56.6291  | 0.04877  | 0.420788 | 0.084881  | 19.39752 | 21.23591 | 33.5034  | 27.02322 | 1388.74 |
| 395.6115 | -2444.1  | 555.8999 | 0.473707 | 25.34727 | 253.4727 | 56.64417 | 0.048794 | 0.420804 | 0.179288  | 19.19663 | 21.24157 | 33.57669 | 27.01707 | 1388.74 |
| 397.0257 | -2444.77 | 555.23   | 0.46663  | 25.01514 | 250.1514 | 56.676   | 0.048807 | 0.420813 | 0.155695  | 19.25984 | 21.2535  | 33.65024 | 27.00246 | 1388.74 |
| 398.4399 | -2445.43 | 554.5701 | 0.494941 | 26.33272 | 263.3272 | 56.70363 | 0.048834 | 0.420832 | 0.249074  | 19.05738 | 21.26386 | 33.72405 | 26.9905  | 1388.74 |
| 399.8542 | -2446.13 | 553.8701 | 0.495114 | 26.34066 | 263.4066 | 56.74781 | 0.048858 | 0.420848 | 0.249583  | 19.07092 | 21.28043 | 33.79823 | 26.97053 | 1388.74 |
| 401.2684 | -2446.83 | 553.1699 | 0.565549 | 29.49028 | 294.9028 | 56.79204 | 0.048896 | 0.420874 | 0.472241  | 18.53776 | 21.29701 | 33.87344 | 26.95118 | 1388.74 |
| 402.6826 | -2447.63 | 552.3701 | 0.579877 | 30.10847 | 301.0847 | 56.87566 | 0.048934 | 0.4209   | 0.51573   | 18.45069 | 21.32837 | 33.94991 | 26.91321 | 1388.74 |
| 404.0968 | -2448.45 | 551.55   | 0.445568 | 24.01623 | 240.1623 | 56.96685 | 0.049006 | 0.420948 | 0.084332  | 19.51322 | 21.36257 | 34.02441 | 26.87325 | 1388.74 |
| 405.511  | -2449.08 | 550.9199 | 0.449956 | 24.22563 | 242.2563 | 56.98174 | 0.049085 | 0.421002 | 0.099016  | 19.4864  | 21.36815 | 34.09694 | 26.86963 | 1388.74 |
| 406.511  | -2449.53 | 550.47   | 0.489995 | 26.10463 | 261.0463 | 56.99409 | 0.049098 | 0.42101  | 0.232304  | 19.19259 | 21.37278 | 34.14864 | 26.86436 | 1388.74 |
| 407.511  | -2450.02 | 549.98   | 0.622173 | 31.88874 | 318.8874 | 57.02308 | 0.049108 | 0.421018 | 0.640484  | 18.15634 | 21.38365 | 34.20219 | 26.85116 | 1388.74 |
| 408.9252 | -2450.9  | 549.1001 | 0.290025 | 16.17348 | 161.7348 | 57.13603 | 0.049133 | 0.421035 | -0.471842 | 20.57803 | 21.42601 | 34.27521 | 26.79916 | 1388.74 |
| 410.3394 | -2451.31 | 548.6899 | 0.452477 | 24.34564 | 243.4564 | 57.05298 | 0.049231 | 0.421101 | 0.107198  | 19.49233 | 21.39487 | 34.3458  | 26.84237 | 1388.74 |
| 411.7536 | -2451.95 | 548.05   | 0.459724 | 24.68938 | 246.8938 | 57.07188 | 0.049159 | 0.421052 | 0.131763  | 19.44551 | 21.40195 | 34.41844 | 26.83039 | 1388.74 |
| 413.1678 | -2452.6  | 547.3999 | 0.473707 | 25.34727 | 253.4727 | 57.0951  | 0.049175 | 0.421063 | 0.178411  | 19.34945 | 21.41066 | 34.49134 | 26.82019 | 1388.74 |
| 414.582  | -2453.27 | 546.73   | 0.459552 | 24.68122 | 246.8122 | 57.12652 | 0.049195 | 0.421077 | 0.1311    | 19.4654  | 21.42245 | 34.56421 | 26.8063  | 1388.74 |
| 415.9962 | -2453.92 | 546.0801 | 0.544487 | 28.56774 | 285.6774 | 57.1496  | 0.049222 | 0.421095 | 0.406386  | 18.82192 | 21.4311  | 34.63809 | 26.79664 | 1388.74 |
| 417.4104 | -2454.69 | 545.3101 | 0.537409 | 28.254   | 282.54   | 57.22111 | 0.049242 | 0.421108 | 0.384167  | 18.90137 | 21.45792 | 34.71307 | 26.764   | 1388.74 |
| 418.8246 | -2455.45 | 544.55   | 0.558643 | 29.18962 | 291.8962 | 57.28863 | 0.049304 | 0.42115  | 0.450124  | 18.75509 | 21.48324 | 34.78818 | 26.73511 | 1388.74 |
| 420.2389 | -2456.24 | 543.76   | 0.615267 | 31.60263 | 316.0263 | 57.36765 | 0.049362 | 0.42119  | 0.619862  | 18.32257 | 21.51287 | 34.86446 | 26.70078 | 1388.74 |
| 421.6531 | -2457.11 | 542.8899 | 0.608017 | 31.3003  | 313.003  | 57.47631 | 0.04943  | 0.421236 | 0.598486  | 18.41662 | 21.55362 | 34.94145 | 26.65322 | 1388.74 |
| 423.0673 | -2457.97 | 542.03   | 0.615267 | 31.60263 | 316.0263 | 57.58103 | 0.049524 | 0.421299 | 0.619513  | 18.39072 | 21.59288 | 35.01829 | 26.60875 | 1388.74 |
| 424.4815 | -2458.84 | 541.1599 | 0.558471 | 29.18208 | 291.8208 | 57.68922 | 0.049614 | 0.42136  | 0.448905  | 18.88762 | 21.63346 | 35.09416 | 26.56269 | 1388.74 |
| 425.8957 | -2459.63 | 540.3701 | 0.537409 | 28.254   | 282.54   | 57.76748 | 0.049707 | 0.421423 | 0.383128  | 19.08185 | 21.6628  | 35.16866 | 26.53067 | 1388.74 |
| 427.3099 | -2460.39 | 539.6101 | 0.480958 | 25.68561 | 256.8561 | 57.83418 | 0.049775 | 0.421469 | 0.201042  | 19.54476 | 21.68782 | 35.24188 | 26.50294 | 1388.74 |
| 428.7241 | -2461.07 | 538.9299 | 0.459552 | 24.68122 | 246.8122 | 57.86914 | 0.049832 | 0.421507 | 0.129633  | 19.71844 | 21.70093 | 35.31392 | 26.48937 | 1388.74 |
| 430.1383 | -2461.72 | 538.28   | 0.43849  | 23.67698 | 236.7698 | 57.89166 | 0.049862 | 0.421528 | 0.058255  | 19.88197 | 21.70937 | 35.38534 | 26.48034 | 1388.74 |
| 431.5525 | -2462.34 | 537.6599 | 0.572627 | 29.79661 | 297.9661 | 57.90178 | 0.049882 | 0.421541 | 0.491669  | 18.84258 | 21.71317 | 35.45838 | 26.47653 | 1388.74 |
| 432.9667 | -2463.15 | 536.8501 | 0.537409 | 28.254   | 282.54   | 57.98718 | 0.04989  | 0.421547 | 0.38272   | 19.15442 | 21.74519 | 35.53282 | 26.43791 | 1388.74 |
| 434.381  | -2463.91 | 536.0901 | 0.424334 | 22.99317 | 229.9317 | 58.05355 | 0.049964 | 0.421596 | 0.009452  | 20.04048 | 21.77008 | 35.60498 | 26.41079 | 1388.74 |
| 435.7952 | -2464.51 | 535.49   | 0.46663  | 25.01514 | 250.1514 | 58.05519 | 0.050021 | 0.421635 | 0.152902  | 19.72852 | 21.7707  | 35.6761  | 26.41246 | 1388.74 |
| 437.2094 | -2465.17 | 534.8301 | 0.47999  | 25.64054 | 256.4054 | 58.08168 | 0.050023 | 0.421636 | 0.19728   | 19.63581 | 21.78063 | 35.74796 | 26.40048 | 1388.74 |
| 438.2094 | -2465.65 | 534.3501 | 0.100099 | 5.71619  | 57.1619  | 58.10583 | 0.050045 | 0.421651 | -1.199826 | 21.68134 | 21.78969 | 35.79636 | 26.39047 | 1388.74 |
| 439.2093 | -2465.75 | 534.25   | 0.516175 | 27.30167 | 273.0167 | 57.95899 | 0.050066 | 0.421665 | 0.314933  | 19.31347 | 21.73462 | 35.84515 | 26.4582  | 1388.74 |
| 440.6236 | -2466.48 | 533.52   | 0.830086 | 39.6956  | 396.956  | 58.01364 | 0.04994  | 0.42158  | 1.178718  | 16.73944 | 21.75511 | 35.9236  | 26.42793 | 1388.74 |
| 441.6235 | -2467.31 | 532.6899 | 0.209963 | 11.85775 | 118.5775 | 58.15812 | 0.049987 | 0.421612 | -0.776746 | 21.3439  | 21.80929 | 35.97612 | 26.36427 | 1388.74 |
| 442.6235 | -2467.52 | 532.48   | 0.381866 | 20.90017 | 209.0017 | 58.06315 | 0.050111 | 0.421696 | -0.139533 | 20.34105 | 21.77368 | 36.02409 | 26.41265 | 1388.74 |
| 444.0377 | -2468.06 | 531.9399 | 0.43124  | 23.32762 | 233.2762 | 58.03898 | 0.050029 | 0.42164  | 0.033054  | 19.98548 | 21.76462 | 36.09423 | 26.42019 | 1388.74 |
| 445.452  | -2468.67 | 531.3301 | 0.608194 | 31.3077  | 313.077  | 58.04471 | 0.050009 | 0.421626 | 0.597754  | 18.59728 | 21.76676 | 36.16754 | 26.4167  | 1388.74 |
| 446.8662 | -2469.53 | 530.47   | 0.580084 | 30.11733 | 301.1733 | 58.14827 | 0.050014 | 0.42163  | 0.513986  | 18.86184 | 21.8056  | 36.24305 | 26.36986 | 1388.74 |
| 447.8661 | -2470.11 | 529.8899 | 0.070607 | 4.038796 | 40.38796 | 58.21113 | 0.050103 | 0.42169  | -1.31329  | 21.77496 | 21.82917 | 36.29226 | 26.34514 | 1388.74 |
| 449.2804 | -2470.21 | 529.79   | 0.660163 | 33.43131 | 334.3131 | 57.98424 | 0.050157 | 0.421726 | 0.746199  | 18.14646 | 21.74409 | 36.36311 | 26.45052 | 1388.74 |
| 450.2803 | -2470.87 | 529.1299 | 0.429936 | 23.26461 | 232.6461 | 58.07575 | 0.049961 | 0.421595 | 0.028737  | 20.00762 | 21.77841 | 36.41553 | 26.40059 | 1388.74 |
| 451.2803 | -2471.3  | 528.7    | 0.176777 | 10.02501 | 100.2501 | 58.07927 | 0.05004  | 0.421648 | -0.904244 | 21.44719 | 21.77973 | 36.46377 | 26.40232 | 1388.74 |
| 452.6945 | -2471.55 | 528.45   | 0.219247 | 12.36624 | 123.6624 | 57.9227  | 0.050043 | 0.42165  | -0.741402 | 21.21706 | 21.72101 | 36.53007 | 26.47381 | 1388.74 |
| 454.1087 | -2471.86 | 528.1399 | 0.96998  | 44.12696 | 441.2696 | 57.79398 | 0.049908 | 0.421559 | 1.476211  | 15.55667 | 21.67274 | 36.60698 | 26.52705 | 1388.74 |
| 455.1087 | -2472.83 | 527.1699 | 0.523253 | 27.62097 | 276.2097 | 57.97561 | 0.049798 | 0.421484 | 0.338142  | 19.26314 | 21.74085 | 36.66442 | 26.43925 | 1388.74 |
| 456.5229 | -2473.57 | 526.4299 | 0.282774 | 15.78954 | 157.8954 | 58.03427 | 0.049954 | 0.42159  | -0.500915 | 20.94169 | 21.76285 | 36.73477 | 26.41915 | 1388.74 |
| 457.9372 | -2473.97 | 526.03   | 0.43849  | 23.67698 | 236.7698 | 57.94746 | 0.050005 | 0.421624 | 0.057925  | 19.90113 | 21.7303  | 36.80402 | 26.46086 | 1388.74 |
| 459.3514 | -2474.59 | 525.4099 | 0.410006 | 22.2939  | 222.939  | 57.95752 | 0.04993  | 0.421573 | -0.040136 | 20.10945 | 21.73407 | 36.87471 | 26.4531  | 1388.74 |
| 460.7656 | -2475.17 | 524.8301 | 0.445568 | 24.01623 | 240.1623 | 57.95055 | 0.049938 | 0.421579 | 0.082172  | 19.85017 | 21.73146 | 36.9455  | 26.45665 | 1388.74 |
| 462.1798 | -2475.8  | 524.2    | 0.572799 | 29.80405 | 298.0405 | 57.96481 | 0.049932 | 0.421575 | 0.492082  | 18.86168 | 21.7368  | 37.01856 | 26.44989 | 1388.74 |
| 463.594  | -2476.61 | 523.3899 | 0.739998 | 36.50135 | 365.0135 | 58.05019 | 0.049945 | 0.421583 | 0.959832  | 17.49871 | 21.76882 | 37.09635 | 26.41151 | 1388.74 |
| 464.594  | -2477.35 | 522.6499 | 0.309821 | 17.21406 | 172.1406 | 58.16776 | 0.050018 | 0.421633 | -0.400514 | 20.83582 | 21.81291 | 37.14852 | 26.36122 | 1388.74 |
| 465.594  | -2477.66 | 522.3401 | 0.254635 | 14.28592 | 142.8592 | 58.1188  | 0.05012  | 0.421701 | -0.607124 | 21.12059 | 21.79455 | 37.19619 | 26.3877  | 1388.74 |
| 467.0082 | -2478.02 | 521.98   | 0.469975 | 25.17237 | 251.7237 | 58.01375 | 0.050077 | 0.421673 | 0.163933  | 19.68912 | 21.75516 | 37.2655  | 26.4337  | 1388.74 |



|          |          |          |          |          |          |          |          |          |           |          |          |          |          |         |
|----------|----------|----------|----------|----------|----------|----------|----------|----------|-----------|----------|----------|----------|----------|---------|
| 468.0082 | -2478.49 | 521.51   | 0.459966 | 24.7008  | 247.008  | 58.03384 | 0.049987 | 0.421612 | 0.130667  | 19.77146 | 21.76269 | 37.31618 | 26.42073 | 1388.74 |
| 469.0082 | -2478.95 | 521.05   | 0.47999  | 25.64054 | 256.4054 | 58.04985 | 0.050004 | 0.421623 | 0.197322  | 19.62506 | 21.76869 | 37.36694 | 26.41417 | 1388.74 |
| 470.0081 | -2479.43 | 520.5701 | 0.459966 | 24.7008  | 247.008  | 58.07402 | 0.050018 | 0.421633 | 0.130596  | 19.78515 | 21.77776 | 37.41769 | 26.40376 | 1388.74 |
| 471.0081 | -2479.89 | 520.1101 | 0.43018  | 23.27641 | 232.7641 | 58.09002 | 0.050039 | 0.421647 | 0.029396  | 20.01076 | 21.78376 | 37.46795 | 26.39737 | 1388.74 |
| 472.0081 | -2480.32 | 519.6799 | 0.551565 | 28.87961 | 288.7961 | 58.09361 | 0.050053 | 0.421656 | 0.426575  | 19.07583 | 21.78511 | 37.51911 | 26.39632 | 1388.74 |
| 473.4223 | -2481.1  | 518.8999 | 0.388772 | 21.24467 | 212.4467 | 58.16746 | 0.050056 | 0.421658 | -0.114943 | 20.33043 | 21.8128  | 37.59089 | 26.36294 | 1388.74 |
| 474.8365 | -2481.65 | 518.3501 | 0.254635 | 14.28592 | 142.8592 | 58.14759 | 0.050119 | 0.421701 | -0.607124 | 21.13105 | 21.80534 | 37.65911 | 26.37463 | 1388.74 |
| 476.2507 | -2482.01 | 517.99   | 0.961744 | 43.8828  | 438.828  | 58.04258 | 0.050102 | 0.421689 | 1.459684  | 15.68802 | 21.76597 | 37.73593 | 26.42162 | 1388.74 |
| 477.665  | -2483.37 | 516.6299 | 0.289801 | 16.16163 | 161.6163 | 58.29549 | 0.050012 | 0.421628 | -0.474817 | 20.99688 | 21.86081 | 37.81303 | 26.30319 | 1388.74 |
| 478.6649 | -2483.66 | 516.3401 | 0.176777 | 10.02501 | 100.2501 | 58.23757 | 0.05023  | 0.421775 | -0.904716 | 21.50565 | 21.83909 | 37.86008 | 26.33852 | 1388.74 |
| 480.0791 | -2483.91 | 516.0901 | 0.169699 | 9.631291 | 96.31291 | 58.08135 | 0.05018  | 0.421742 | -0.931837 | 21.4735  | 21.7805  | 37.92589 | 26.40726 | 1388.74 |
| 481.4934 | -2484.15 | 515.8501 | 0.180178 | 10.21383 | 102.1383 | 57.92    | 0.050045 | 0.421651 | -0.891175 | 21.3758  | 21.72    | 37.9919  | 26.47512 | 1388.74 |
| 482.4933 | -2484.33 | 515.6699 | 0.388772 | 21.24467 | 212.4467 | 57.81059 | 0.049906 | 0.421557 | -0.114591 | 20.2057  | 21.67897 | 38.04    | 26.51933 | 1388.74 |
| 483.9076 | -2484.88 | 515.1201 | 0.007078 | 0.405532 | 4.055324 | 57.79065 | 0.049812 | 0.421494 | -1.55402  | 21.67095 | 21.6715  | 38.10754 | 26.52448 | 1388.74 |
| 485.3218 | -2484.89 | 515.1101 | 0.650657 | 33.05033 | 330.5033 | 57.52023 | 0.049795 | 0.421482 | 0.720348  | 18.07987 | 21.57009 | 38.17869 | 26.64845 | 1388.74 |
| 486.736  | -2485.81 | 514.1899 | 0.369877 | 20.29826 | 202.9826 | 57.64617 | 0.049562 | 0.421325 | -0.180948 | 20.27487 | 21.61731 | 38.25244 | 26.58029 | 1388.74 |
| 487.736  | -2486.18 | 513.8201 | 0.12012  | 6.849528 | 68.49528 | 57.62385 | 0.04967  | 0.421398 | -1.12173  | 21.45472 | 21.60894 | 38.30037 | 26.59522 | 1388.74 |
| 488.7359 | -2486.3  | 513.7    | 0.198011 | 11.20032 | 112.0032 | 57.48542 | 0.049651 | 0.421385 | -0.821698 | 21.14646 | 21.55703 | 38.34731 | 26.65844 | 1388.74 |
| 490.1502 | -2486.58 | 513.4199 | 0.379887 | 20.80111 | 208.0111 | 57.34167 | 0.049532 | 0.421304 | -0.145193 | 20.10153 | 21.50313 | 38.41588 | 26.72015 | 1388.74 |
| 491.1501 | -2486.96 | 513.04   | 0.388944 | 21.25326 | 212.5326 | 57.32367 | 0.049408 | 0.42122  | -0.112804 | 20.03435 | 21.49638 | 38.46571 | 26.72323 | 1388.74 |
| 492.5644 | -2487.51 | 512.49   | 0.540044 | 28.37102 | 283.7102 | 57.30388 | 0.049392 | 0.42121  | 0.392104  | 18.9079  | 21.48895 | 38.53834 | 26.73179 | 1388.74 |
| 493.5643 | -2488.05 | 511.95   | 0.849871 | 40.36023 | 403.6023 | 57.35254 | 0.049375 | 0.421198 | 1.224911  | 16.38823 | 21.5072  | 38.59501 | 26.70838 | 1388.74 |
| 494.5643 | -2488.9  | 511.1001 | 0.530035 | 27.92514 | 279.2514 | 57.50441 | 0.049417 | 0.421227 | 0.360518  | 19.05323 | 21.56415 | 38.65144 | 26.63964 | 1388.74 |
| 495.5643 | -2489.43 | 510.5701 | 0.260012 | 14.57488 | 145.7488 | 57.54899 | 0.049548 | 0.421315 | -0.585421 | 20.88639 | 21.58087 | 38.70151 | 26.6246  | 1388.74 |
| 496.5643 | -2489.69 | 510.3101 | 0.390141 | 21.31278 | 213.1278 | 57.47665 | 0.049586 | 0.421341 | -0.109001 | 20.07969 | 21.55375 | 38.75033 | 26.65975 | 1388.74 |
| 497.5643 | -2490.08 | 509.9199 | 0.39991  | 21.79698 | 217.9698 | 57.46317 | 0.049524 | 0.421299 | -0.074474 | 20.00807 | 21.54869 | 38.80022 | 26.66334 | 1388.74 |
| 498.5643 | -2490.48 | 509.52   | 0.370121 | 20.31057 | 203.1057 | 57.45395 | 0.049512 | 0.421291 | -0.179958 | 20.20566 | 21.54523 | 38.84996 | 26.66712 | 1388.74 |
| 499.5643 | -2490.85 | 509.1499 | 0.520009 | 27.47484 | 274.7484 | 57.43168 | 0.049505 | 0.421286 | 0.328457  | 19.10781 | 21.53688 | 38.90083 | 26.67712 | 1388.74 |
| 500.5643 | -2491.37 | 508.6299 | 0.279791 | 15.63113 | 156.3113 | 57.47235 | 0.049485 | 0.421273 | -0.510936 | 20.75505 | 21.55213 | 38.951   | 26.65742 | 1388.74 |
| 501.5643 | -2491.65 | 508.3501 | 0.040039 | 2.292868 | 22.92868 | 57.40913 | 0.04952  | 0.421297 | -1.42857  | 21.51119 | 21.52842 | 38.99832 | 26.68827 | 1388.74 |
| 502.5643 | -2491.69 | 508.3101 | 0.233396 | 13.13743 | 131.3743 | 57.23218 | 0.049466 | 0.42126  | -0.686051 | 20.90036 | 21.46207 | 39.04548 | 26.76845 | 1388.74 |
| 503.9785 | -2492.02 | 507.98   | 0.879892 | 41.34428 | 413.4428 | 57.11163 | 0.049313 | 0.421157 | 1.291489  | 16.07879 | 21.41686 | 39.12196 | 26.81838 | 1388.74 |
| 504.9785 | -2492.9  | 507.1001 | 0.268785 | 15.04469 | 150.4469 | 57.27243 | 0.04921  | 0.421086 | -0.551552 | 20.741   | 21.47716 | 39.17628 | 26.73861 | 1388.74 |
| 506.3927 | -2493.28 | 506.72   | 0.523242 | 27.62047 | 276.2047 | 57.17558 | 0.049348 | 0.42118  | 0.339116  | 18.9974  | 21.44084 | 39.24746 | 26.78988 | 1388.74 |
| 507.807  | -2494.02 | 505.98   | 0.459542 | 24.68076 | 246.8076 | 57.23523 | 0.049265 | 0.421124 | 0.130907  | 19.50251 | 21.46321 | 39.32093 | 26.75837 | 1388.74 |
| 509.2212 | -2494.67 | 505.3301 | 0.311252 | 17.28888 | 172.8888 | 57.25823 | 0.049316 | 0.421158 | -0.393526 | 20.50171 | 21.47184 | 39.39163 | 26.74983 | 1388.74 |
| 510.6354 | -2495.11 | 504.8899 | 0.47999  | 25.64054 | 256.4054 | 57.18911 | 0.049336 | 0.421172 | 0.198848  | 19.33406 | 21.44592 | 39.46264 | 26.78301 | 1388.74 |
| 511.6354 | -2495.59 | 504.4099 | 0.719978 | 35.75305 | 357.5305 | 57.21384 | 0.049276 | 0.421132 | 0.909475  | 17.41181 | 21.45519 | 39.51706 | 26.76887 | 1388.74 |
| 512.6354 | -2496.31 | 503.6899 | 0.399906 | 21.79678 | 217.9678 | 57.32688 | 0.049298 | 0.421146 | -0.073954 | 19.96064 | 21.49758 | 39.57058 | 26.71701 | 1388.74 |
| 513.6354 | -2496.71 | 503.29   | 0.325235 | 18.01636 | 180.1636 | 57.3177  | 0.049395 | 0.421212 | -0.342265 | 20.44024 | 21.49414 | 39.62008 | 26.72547 | 1388.74 |
| 515.0496 | -2497.17 | 502.8301 | 0.63014  | 32.21665 | 322.1665 | 57.25765 | 0.049387 | 0.421207 | 0.66287   | 18.16581 | 21.47162 | 39.69335 | 26.75316 | 1388.74 |
| 516.0496 | -2497.8  | 502.2    | 0.452464 | 24.34504 | 243.4504 | 57.33997 | 0.049335 | 0.421171 | 0.106912  | 19.59048 | 21.50249 | 39.74632 | 26.71252 | 1388.74 |
| 517.4639 | -2498.44 | 501.5601 | 0.630133 | 32.21639 | 322.1639 | 57.35872 | 0.049406 | 0.42122  | 0.662811  | 18.19793 | 21.50952 | 39.82117 | 26.70684 | 1388.74 |
| 518.4639 | -2499.07 | 500.9299 | 0.176773 | 10.0248  | 100.248  | 57.4409  | 0.049422 | 0.42123  | -0.902718 | 21.21147 | 21.54034 | 39.87192 | 26.66932 | 1388.74 |
| 519.8781 | -2499.32 | 500.6799 | 0.409997 | 22.29348 | 222.9348 | 57.28285 | 0.049493 | 0.421278 | -0.039143 | 19.87542 | 21.48107 | 39.94076 | 26.74595 | 1388.74 |
| 521.2923 | -2499.9  | 500.1001 | 0.53032  | 27.93791 | 279.3791 | 57.27597 | 0.049357 | 0.421186 | 0.361556  | 18.9753  | 21.47849 | 40.01356 | 26.74331 | 1388.74 |
| 522.7066 | -2500.65 | 499.3501 | 0.280032 | 15.64395 | 156.4395 | 57.33946 | 0.049351 | 0.421182 | -0.509705 | 20.70577 | 21.5023  | 40.08484 | 26.71344 | 1388.74 |
| 523.7066 | -2500.93 | 499.0701 | 0.219242 | 12.36599 | 123.6599 | 57.27625 | 0.049406 | 0.421219 | -0.739842 | 20.98028 | 21.47859 | 40.13282 | 26.74527 | 1388.74 |
| 525.1208 | -2501.24 | 498.76   | 0.37478  | 20.54501 | 205.4501 | 57.14634 | 0.049351 | 0.421182 | -0.16294  | 20.06687 | 21.42988 | 40.20173 | 26.80373 | 1388.74 |
| 526.535  | -2501.77 | 498.23   | 0.671704 | 33.88943 | 338.8943 | 57.11767 | 0.049239 | 0.421107 | 0.780094  | 17.78034 | 21.41913 | 40.27646 | 26.81236 | 1388.74 |
| 527.9493 | -2502.72 | 497.28   | 0.290042 | 16.17438 | 161.7438 | 57.25502 | 0.049215 | 0.42109  | -0.471978 | 20.62079 | 21.47063 | 40.35012 | 26.74697 | 1388.74 |
| 528.9493 | -2503.01 | 496.99   | 0.290042 | 16.17438 | 161.7438 | 57.1964  | 0.049333 | 0.42117  | -0.472267 | 20.59968 | 21.44865 | 40.39863 | 26.77948 | 1388.74 |
| 529.9493 | -2503.3  | 496.7    | 0.320075 | 17.74856 | 177.4856 | 57.13769 | 0.049283 | 0.421136 | -0.360941 | 20.4068  | 21.42663 | 40.44741 | 26.80482 | 1388.74 |
| 530.9492 | -2503.62 | 496.3799 | 0.339391 | 18.74676 | 187.4676 | 57.09277 | 0.049232 | 0.421101 | -0.290158 | 20.27396 | 21.40979 | 40.49657 | 26.82373 | 1388.74 |
| 532.3635 | -2504.1  | 495.8999 | 0.296924 | 16.53742 | 165.3742 | 57.04166 | 0.049193 | 0.421075 | -0.446308 | 20.50578 | 21.39062 | 40.56593 | 26.84609 | 1388.74 |
| 533.7777 | -2504.52 | 495.48   | 0.601099 | 31.01002 | 310.1002 | 56.96297 | 0.049149 | 0.421045 | 0.578698  | 18.30812 | 21.36111 | 40.6388  | 26.88127 | 1388.74 |
| 535.192  | -2505.37 | 494.6299 | 0.399906 | 21.79678 | 217.9678 | 57.06514 | 0.049081 | 0.420999 | -0.073444 | 19.86951 | 21.39943 | 40.71289 | 26.83021 | 1388.74 |
| 536.1919 | -2505.77 | 494.23   | 0.399906 | 21.79678 | 217.9678 | 57.05599 | 0.04917  | 0.421059 | -0.073652 | 19.86632 | 21.39599 | 40.76322 | 26.83832 | 1388.74 |
| 537.1919 | -2506.17 | 493.8301 | 0.332313 | 18.38233 | 183.8233 | 57.04681 | 0.049162 | 0.421054 | -0.315796 | 20.30096 | 21.39255 | 40.81301 | 26.8423  | 1388.74 |
| 538.6062 | -2506.64 | 493.3601 | 0.516337 | 27.30899 | 273.0899 | 56.99113 | 0.049154 | 0.421048 | 0.317506  | 18.9897  | 21.37168 | 40.885   | 26.86818 | 1388.74 |

|          |          |          |          |          |          |          |          |          |           |          |          |          |          |         |
|----------|----------|----------|----------|----------|----------|----------|----------|----------|-----------|----------|----------|----------|----------|---------|
| 540.0204 | -2507.37 | 492.6299 | 0.629895 | 32.20664 | 322.0664 | 57.04716 | 0.049106 | 0.421016 | 0.662773  | 18.10102 | 21.39269 | 40.96126 | 26.83972 | 1388.74 |
| 541.0204 | -2508    | 492      | 0.438481 | 23.67653 | 236.7653 | 57.12978 | 0.049154 | 0.421049 | 0.059868  | 19.62038 | 21.42367 | 41.01428 | 26.80299 | 1388.74 |
| 542.4346 | -2508.62 | 491.3799 | 0.459542 | 24.68076 | 246.8076 | 57.14032 | 0.049225 | 0.421097 | 0.130998  | 19.47017 | 21.42762 | 41.08664 | 26.80111 | 1388.74 |
| 543.8489 | -2509.27 | 490.73   | 0.424325 | 22.99274 | 229.9274 | 57.16337 | 0.049234 | 0.421103 | 0.011123  | 19.73325 | 21.43626 | 41.15879 | 26.79069 | 1388.74 |
| 545.2631 | -2509.87 | 490.1299 | 0.473697 | 25.3468  | 253.468  | 57.16533 | 0.049254 | 0.421116 | 0.178197  | 19.37333 | 21.437   | 41.23111 | 26.79063 | 1388.74 |
| 546.6774 | -2510.54 | 489.46   | 0.409916 | 22.28952 | 222.8952 | 57.19668 | 0.049256 | 0.421118 | -0.038867 | 19.84608 | 21.44875 | 41.30323 | 26.77602 | 1388.74 |
| 547.6773 | -2510.95 | 489.05   | 0.179933 | 10.20028 | 102.0028 | 57.19185 | 0.049283 | 0.421136 | -0.890213 | 21.10797 | 21.44694 | 41.35207 | 26.77945 | 1388.74 |
| 548.6773 | -2511.13 | 488.8701 | 0.230229 | 12.96524 | 129.6524 | 57.08116 | 0.049279 | 0.421133 | -0.697639 | 20.85973 | 21.40543 | 41.39972 | 26.8312  | 1388.74 |
| 549.6773 | -2511.36 | 488.6399 | 0.339391 | 18.74676 | 187.4676 | 56.99425 | 0.049183 | 0.421068 | -0.290041 | 20.23898 | 21.37284 | 41.44838 | 26.86799 | 1388.74 |
| 551.0916 | -2511.84 | 488.1599 | 0.339391 | 18.74676 | 187.4676 | 56.94307 | 0.049108 | 0.421018 | -0.289861 | 20.22081 | 21.35365 | 41.51829 | 26.88889 | 1388.74 |
| 552.5058 | -2512.32 | 487.6799 | 0.459542 | 24.68076 | 246.8076 | 56.89188 | 0.049064 | 0.420988 | 0.13137   | 19.38552 | 21.33445 | 41.58971 | 26.91118 | 1388.74 |
| 553.92   | -2512.97 | 487.03   | 0.480775 | 25.6771  | 256.771  | 56.9151  | 0.04902  | 0.420958 | 0.202164  | 19.23553 | 21.34316 | 41.66294 | 26.89829 | 1388.74 |
| 555.3343 | -2513.65 | 486.3501 | 0.41017  | 22.30194 | 223.0194 | 56.95082 | 0.04904  | 0.420971 | -0.037477 | 19.75902 | 21.35656 | 41.73548 | 26.88228 | 1388.74 |
| 556.7485 | -2514.23 | 485.77   | 0.431403 | 23.33551 | 233.3551 | 56.94421 | 0.049071 | 0.420992 | 0.035847  | 19.60734 | 21.35408 | 41.80733 | 26.88674 | 1388.74 |
| 558.1628 | -2514.84 | 485.1599 | 0.381686 | 20.89113 | 208.9113 | 56.95054 | 0.049065 | 0.420988 | -0.137697 | 19.95247 | 21.35645 | 41.87883 | 26.8835  | 1388.74 |
| 559.577  | -2515.38 | 484.6201 | 0.403092 | 21.95395 | 219.5395 | 56.92622 | 0.049071 | 0.420992 | -0.062259 | 19.79932 | 21.34733 | 41.94998 | 26.89522 | 1388.74 |
| 560.9912 | -2515.95 | 484.05   | 0.417247 | 22.64821 | 226.4821 | 56.91522 | 0.04905  | 0.420978 | -0.012911 | 19.69736 | 21.34321 | 42.0216  | 26.89951 | 1388.74 |
| 562.4055 | -2516.54 | 483.46   | 0.43123  | 23.32717 | 233.2717 | 56.91294 | 0.04904  | 0.420972 | 0.035326  | 19.5978  | 21.34235 | 42.09358 | 26.90018 | 1388.74 |
| 563.8197 | -2517.15 | 482.8501 | 0.509259 | 26.98789 | 269.8789 | 56.91918 | 0.049038 | 0.42097  | 0.29503   | 19.02031 | 21.34469 | 42.16682 | 26.89714 | 1388.74 |
| 565.234  | -2517.87 | 482.1299 | 0.424153 | 22.98435 | 229.8435 | 56.97131 | 0.049044 | 0.420974 | 0.010974  | 19.66817 | 21.36424 | 42.23993 | 26.87277 | 1388.74 |
| 566.6482 | -2518.47 | 481.53   | 0.480779 | 25.67726 | 256.7726 | 56.97325 | 0.049089 | 0.421004 | 0.202018  | 19.25516 | 21.36497 | 42.31259 | 26.8738  | 1388.74 |
| 568.0624 | -2519.15 | 480.8501 | 0.339391 | 18.74676 | 187.4676 | 57.00891 | 0.04909  | 0.421005 | -0.289817 | 20.24418 | 21.37834 | 42.3842  | 26.85706 | 1388.74 |
| 569.4767 | -2519.63 | 480.3701 | 0.445559 | 24.01578 | 240.1578 | 56.95778 | 0.049121 | 0.421026 | 0.084033  | 19.51018 | 21.35917 | 42.45535 | 26.8825  | 1388.74 |
| 570.8909 | -2520.26 | 479.74   | 0.388936 | 21.25285 | 212.5285 | 56.97262 | 0.049077 | 0.420996 | -0.11205  | 19.91171 | 21.36473 | 42.5271  | 26.87359 | 1388.74 |
| 572.3051 | -2520.81 | 479.1899 | 0.339847 | 18.77018 | 187.7018 | 56.95284 | 0.04909  | 0.421005 | -0.288156 | 20.22147 | 21.35731 | 42.59758 | 26.88348 | 1388.74 |
| 573.3051 | -2521.15 | 478.8501 | 0.41016  | 22.30149 | 223.0149 | 56.91686 | 0.049073 | 0.420994 | -0.037586 | 19.7473  | 21.34382 | 42.64762 | 26.89973 | 1388.74 |
| 574.3051 | -2521.56 | 478.4399 | 0.41993  | 22.77901 | 227.7901 | 56.91216 | 0.049042 | 0.420973 | -0.003604 | 19.67749 | 21.34206 | 42.69835 | 26.90061 | 1388.74 |
| 575.3051 | -2521.98 | 478.02   | 0.388936 | 21.25285 | 212.5285 | 56.91171 | 0.049038 | 0.42097  | -0.111957 | 19.89043 | 21.34189 | 42.74889 | 26.90064 | 1388.74 |
| 576.7193 | -2522.53 | 477.47   | 0.409916 | 22.28952 | 222.8952 | 56.89193 | 0.049037 | 0.42097  | -0.038353 | 19.74034 | 21.33447 | 42.82026 | 26.90998 | 1388.74 |
| 577.7193 | -2522.94 | 477.0601 | 0.381858 | 20.89976 | 208.9976 | 56.88714 | 0.04902  | 0.420958 | -0.136977 | 19.92911 | 21.33268 | 42.87068 | 26.91151 | 1388.74 |
| 579.1336 | -2523.48 | 476.52   | 0.380131 | 20.81334 | 208.1334 | 56.86292 | 0.049016 | 0.420955 | -0.143101 | 19.93208 | 21.3236  | 42.94164 | 26.92279 | 1388.74 |
| 580.1336 | -2523.86 | 476.1399 | 0.36988  | 20.29845 | 202.9845 | 56.84503 | 0.048995 | 0.420941 | -0.179586 | 19.99307 | 21.31688 | 42.99173 | 26.93036 | 1388.74 |
| 581.1335 | -2524.23 | 475.77   | 0.424325 | 22.99274 | 229.9274 | 56.82256 | 0.04898  | 0.420931 | 0.011719  | 19.6156  | 21.30846 | 43.04222 | 26.94034 | 1388.74 |
| 582.5478 | -2524.83 | 475.1699 | 0.551554 | 28.87909 | 288.7909 | 56.82463 | 0.048961 | 0.420917 | 0.428964  | 18.65924 | 21.30924 | 43.11612 | 26.93852 | 1388.74 |
| 583.962  | -2525.61 | 474.3899 | 0.309818 | 17.2139  | 172.139  | 56.90055 | 0.048962 | 0.420919 | -0.397967 | 20.38192 | 21.33771 | 43.18857 | 26.90265 | 1388.74 |
| 584.962  | -2525.92 | 474.0801 | 0.325235 | 18.01636 | 180.1636 | 56.85082 | 0.049028 | 0.420963 | -0.341377 | 20.27375 | 21.31906 | 43.23776 | 26.92903 | 1388.74 |
| 586.3763 | -2526.38 | 473.6201 | 0.445559 | 24.01578 | 240.1578 | 56.79043 | 0.048985 | 0.420934 | 0.084349  | 19.45285 | 21.29641 | 43.30896 | 26.9558  | 1388.74 |
| 587.7905 | -2527.01 | 472.99   | 0.480775 | 25.6771  | 256.771  | 56.80537 | 0.048933 | 0.420899 | 0.202365  | 19.19844 | 21.30201 | 43.38214 | 26.94645 | 1388.74 |
| 589.2047 | -2527.69 | 472.3101 | 0.466792 | 25.0228  | 250.228  | 56.84119 | 0.048946 | 0.420907 | 0.155918  | 19.31477 | 21.31545 | 43.45558 | 26.93003 | 1388.74 |
| 590.619  | -2528.35 | 471.6499 | 0.494931 | 26.33223 | 263.3223 | 56.86878 | 0.048977 | 0.420928 | 0.248715  | 19.11296 | 21.32579 | 43.52919 | 26.9183  | 1388.74 |
| 592.0332 | -2529.05 | 470.95   | 0.487853 | 26.00558 | 260.0558 | 56.91276 | 0.049    | 0.420944 | 0.225504  | 19.18141 | 21.34229 | 43.60305 | 26.89853 | 1388.74 |
| 593.4475 | -2529.74 | 470.26   | 0.438481 | 23.67653 | 236.7653 | 56.95261 | 0.049038 | 0.42097  | 0.060138  | 19.55953 | 21.35723 | 43.67606 | 26.88135 | 1388.74 |
| 594.8617 | -2530.36 | 469.6399 | 0.289801 | 16.16163 | 161.6163 | 56.96323 | 0.049073 | 0.420993 | -0.47253  | 20.51702 | 21.36121 | 43.74664 | 26.87783 | 1388.74 |
| 595.8617 | -2530.65 | 469.3501 | 0.381858 | 20.89976 | 208.9976 | 56.90424 | 0.049082 | 0.421    | -0.137123 | 19.9351  | 21.33909 | 43.79608 | 26.90608 | 1388.74 |
| 597.2759 | -2531.19 | 468.8101 | 0.502009 | 26.65705 | 266.5705 | 56.88001 | 0.049031 | 0.420965 | 0.27161   | 19.06279 | 21.33    | 43.86861 | 26.91534 | 1388.74 |
| 598.6902 | -2531.9  | 468.1001 | 0.424325 | 22.99274 | 229.9274 | 56.92803 | 0.04901  | 0.420951 | 0.011648  | 19.65201 | 21.34801 | 43.94167 | 26.89173 | 1388.74 |
| 600.1044 | -2532.5  | 467.5    | 0.396014 | 21.60425 | 216.0425 | 56.93009 | 0.049051 | 0.420979 | -0.087043 | 19.84901 | 21.34878 | 44.01327 | 26.89256 | 1388.74 |
| 601.5186 | -2533.06 | 466.9399 | 0.43123  | 23.32717 | 233.2717 | 56.91471 | 0.049053 | 0.42098  | 0.035296  | 19.59841 | 21.34302 | 44.08497 | 26.8999  | 1388.74 |
| 602.9329 | -2533.67 | 466.3301 | 0.488026 | 26.01357 | 260.1357 | 56.92095 | 0.04904  | 0.420971 | 0.22598   | 19.18286 | 21.34536 | 44.15791 | 26.89638 | 1388.74 |
| 604.3471 | -2534.36 | 465.6399 | 0.46662  | 25.01468 | 250.1468 | 56.96087 | 0.049045 | 0.420975 | 0.155112  | 19.35672 | 21.36033 | 44.2313  | 26.87776 | 1388.74 |
| 605.7614 | -2535.02 | 464.98   | 0.452464 | 24.34504 | 243.4504 | 56.98826 | 0.04908  | 0.420998 | 0.107504  | 19.47031 | 21.3706  | 44.30415 | 26.86633 | 1388.74 |
| 607.1756 | -2535.66 | 464.3401 | 0.431403 | 23.33551 | 233.3551 | 57.00723 | 0.049103 | 0.421014 | 0.035771  | 19.62904 | 21.37771 | 44.37649 | 26.85841 | 1388.74 |
| 608.5898 | -2536.27 | 463.73   | 0.502009 | 26.65705 | 266.5705 | 57.01354 | 0.04912  | 0.421025 | 0.271408  | 19.10755 | 21.38008 | 44.44951 | 26.85614 | 1388.74 |
| 610.0041 | -2536.98 | 463.02   | 0.502009 | 26.65705 | 266.5705 | 57.06142 | 0.049125 | 0.421029 | 0.271396  | 19.12359 | 21.39803 | 44.52349 | 26.83385 | 1388.74 |
| 611.4183 | -2537.69 | 462.3101 | 0.445559 | 24.01578 | 240.1578 | 57.10925 | 0.049166 | 0.421057 | 0.083928  | 19.56206 | 21.41597 | 44.5966  | 26.81315 | 1388.74 |
| 612.8326 | -2538.32 | 461.6799 | 0.459542 | 24.68076 | 246.8076 | 57.12403 | 0.049208 | 0.421085 | 0.131039  | 19.46462 | 21.42151 | 44.66908 | 26.80799 | 1388.74 |
| 614.2468 | -2538.97 | 461.03   | 0.41017  | 22.30194 | 223.0194 | 57.1471  | 0.04922  | 0.421094 | -0.037901 | 19.82712 | 21.43016 | 44.74107 | 26.79772 | 1388.74 |
| 615.661  | -2539.55 | 460.45   | 0.452467 | 24.34519 | 243.4519 | 57.14043 | 0.04924  | 0.421107 | 0.107143  | 19.52228 | 21.42766 | 44.81295 | 26.8017  | 1388.74 |
| 617.0753 | -2540.19 | 459.8101 | 0.424325 | 22.99274 | 229.9274 | 57.15929 | 0.049234 | 0.421103 | 0.011123  | 19.73184 | 21.43473 | 44.885   | 26.79261 | 1388.74 |
| 618.4895 | -2540.79 | 459.21   | 0.459542 | 24.68076 | 246.8076 | 57.16124 | 0.049251 | 0.421114 | 0.13094   | 19.4773  | 21.43547 | 44.95714 | 26.7924  | 1388.74 |



|          |          |          |          |          |          |          |          |          |           |          |          |          |          |         |
|----------|----------|----------|----------|----------|----------|----------|----------|----------|-----------|----------|----------|----------|----------|---------|
| 619.9037 | -2541.44 | 458.5601 | 0.417247 | 22.64821 | 226.4821 | 57.18428 | 0.049252 | 0.421115 | -0.013386 | 19.79048 | 21.4441  | 45.02917 | 26.78168 | 1388.74 |
| 621.318  | -2542.03 | 457.97   | 0.424153 | 22.98435 | 229.8435 | 57.18193 | 0.049272 | 0.421129 | 0.010439  | 19.74088 | 21.44322 | 45.10072 | 26.78363 | 1388.74 |
| 622.7322 | -2542.63 | 457.3701 | 0.388936 | 21.25285 | 212.5285 | 57.18376 | 0.04927  | 0.421127 | -0.112507 | 19.98551 | 21.44391 | 45.17192 | 26.78269 | 1388.74 |
| 624.1465 | -2543.18 | 456.8201 | 0.510015 | 27.02226 | 270.2226 | 57.16398 | 0.049272 | 0.421128 | 0.296935  | 19.09627 | 21.43649 | 45.24429 | 26.79202 | 1388.74 |
| 625.1465 | -2543.69 | 456.3101 | 0.280032 | 15.64395 | 156.4395 | 57.20091 | 0.049255 | 0.421117 | -0.509469 | 20.65574 | 21.45034 | 45.29461 | 26.77399 | 1388.74 |
| 626.1464 | -2543.97 | 456.03   | 0.480775 | 25.6771  | 256.771  | 57.13758 | 0.049287 | 0.421138 | 0.201554  | 19.31072 | 21.42659 | 45.34465 | 26.80504 | 1388.74 |
| 627.5607 | -2544.65 | 455.3501 | 0.19093  | 10.80941 | 108.0941 | 57.17305 | 0.049232 | 0.421101 | -0.847826 | 21.05948 | 21.43989 | 45.41471 | 26.78606 | 1388.74 |
| 628.9749 | -2544.92 | 455.0801 | 0.558632 | 29.1891  | 291.891  | 57.02392 | 0.049263 | 0.421122 | 0.450179  | 18.66852 | 21.38397 | 45.48591 | 26.85743 | 1388.74 |
| 630.3892 | -2545.71 | 454.29   | 0.480775 | 25.6771  | 256.771  | 57.10331 | 0.049134 | 0.421035 | 0.201903  | 19.29914 | 21.41374 | 45.5604  | 26.81454 | 1388.74 |
| 631.8034 | -2546.39 | 453.6101 | 0.304175 | 16.91842 | 169.1842 | 57.13887 | 0.049202 | 0.421081 | -0.419427 | 20.49971 | 21.42708 | 45.63147 | 26.80081 | 1388.74 |
| 633.2176 | -2546.82 | 453.1799 | 0.261535 | 14.65656 | 146.5656 | 57.06505 | 0.049233 | 0.421102 | -0.578906 | 20.70306 | 21.39939 | 45.70012 | 26.8368  | 1388.74 |
| 634.6319 | -2547.19 | 452.8101 | 0.43018  | 23.27641 | 232.7641 | 56.96303 | 0.049169 | 0.421059 | 0.03142   | 19.62253 | 21.36114 | 45.77026 | 26.88211 | 1388.74 |
| 635.6319 | -2547.62 | 452.3799 | 0.381686 | 20.89113 | 208.9113 | 56.96695 | 0.049082 | 0.420999 | -0.137735 | 19.95822 | 21.36261 | 45.82079 | 26.87646 | 1388.74 |
| 637.0461 | -2548.16 | 451.8401 | 0.367702 | 20.1886  | 201.886  | 56.94263 | 0.049085 | 0.421002 | -0.187593 | 20.04157 | 21.35349 | 45.8915  | 26.88808 | 1388.74 |
| 638.4603 | -2548.68 | 451.3201 | 0.360111 | 19.80451 | 198.0451 | 56.9095  | 0.049064 | 0.420988 | -0.214785 | 20.07883 | 21.34106 | 45.962   | 26.90283 | 1388.74 |
| 639.4603 | -2549.04 | 450.96   | 0.36988  | 20.29845 | 202.9845 | 56.88267 | 0.049035 | 0.420968 | -0.179682 | 20.00631 | 21.331   | 46.0119  | 26.91428 | 1388.74 |
| 640.4603 | -2549.41 | 450.5901 | 0.31833  | 17.65784 | 176.5784 | 56.8602  | 0.049012 | 0.420953 | -0.366702 | 20.31796 | 21.32258 | 46.06149 | 26.92391 | 1388.74 |
| 641.8746 | -2549.86 | 450.1399 | 0.452464 | 24.34504 | 243.4504 | 56.79534 | 0.048993 | 0.420939 | 0.107705  | 19.4044  | 21.29825 | 46.1327  | 26.95382 | 1388.74 |
| 643.2888 | -2550.5  | 449.5    | 0.459542 | 24.68076 | 246.8076 | 56.81442 | 0.048937 | 0.420901 | 0.131664  | 19.35912 | 21.30541 | 46.20567 | 26.94234 | 1388.74 |
| 644.703  | -2551.15 | 448.8501 | 0.510015 | 27.02226 | 270.2226 | 56.83772 | 0.048953 | 0.420913 | 0.297656  | 18.98728 | 21.31415 | 46.27943 | 26.93201 | 1388.74 |
| 645.703  | -2551.66 | 448.3401 | 0.450204 | 24.23748 | 242.3748 | 56.87496 | 0.048974 | 0.420926 | 0.100115  | 19.44808 | 21.32811 | 46.33146 | 26.91524 | 1388.74 |
| 646.703  | -2552.11 | 447.8899 | 0.409916 | 22.28952 | 222.8952 | 56.88748 | 0.049006 | 0.420948 | -0.038278 | 19.7388  | 21.3328  | 46.3825  | 26.91071 | 1388.74 |
| 647.703  | -2552.52 | 447.48   | 0.452464 | 24.34504 | 243.4504 | 56.88269 | 0.049016 | 0.420955 | 0.107651  | 19.43425 | 21.33101 | 46.43355 | 26.91345 | 1388.74 |
| 649.1172 | -2553.16 | 446.8401 | 0.41016  | 22.30149 | 223.0149 | 56.90173 | 0.049012 | 0.420953 | -0.037443 | 19.74205 | 21.33815 | 46.50575 | 26.90427 | 1388.74 |
| 650.1172 | -2553.57 | 446.4299 | 0.381858 | 20.89976 | 208.9976 | 56.89705 | 0.049029 | 0.420964 | -0.136997 | 19.93259 | 21.33639 | 46.55616 | 26.90719 | 1388.74 |
| 651.5315 | -2554.11 | 445.8899 | 0.388763 | 21.24426 | 212.4426 | 56.87283 | 0.049025 | 0.420961 | -0.112536 | 19.878   | 21.32731 | 46.62721 | 26.91847 | 1388.74 |
| 652.9457 | -2554.66 | 445.3401 | 0.41017  | 22.30194 | 223.0194 | 56.85293 | 0.049004 | 0.420947 | -0.037392 | 19.72506 | 21.31985 | 46.69863 | 26.92699 | 1388.74 |
| 654.3599 | -2555.24 | 444.76   | 0.396014 | 21.60425 | 216.0425 | 56.84632 | 0.048987 | 0.420935 | -0.08689  | 19.81981 | 21.31737 | 46.77016 | 26.92938 | 1388.74 |
| 655.7742 | -2555.8  | 444.2    | 0.417075 | 22.63978 | 226.3978 | 56.83095 | 0.048981 | 0.420931 | -0.013348 | 19.6694  | 21.31161 | 46.84178 | 26.93641 | 1388.74 |
| 657.1884 | -2556.39 | 443.6101 | 0.410172 | 22.30209 | 223.0209 | 56.82859 | 0.048968 | 0.420922 | -0.037297 | 19.71659 | 21.31072 | 46.9136  | 26.93696 | 1388.74 |
| 658.6027 | -2556.97 | 443.03   | 0.438481 | 23.67653 | 236.7653 | 56.82199 | 0.048966 | 0.420921 | 0.060307  | 19.51467 | 21.30824 | 46.9857  | 26.94    | 1388.74 |
| 660.0169 | -2557.59 | 442.4099 | 0.381686 | 20.89113 | 208.9113 | 56.83266 | 0.04896  | 0.420917 | -0.137447 | 19.91117 | 21.31225 | 47.05744 | 26.93469 | 1388.74 |
| 661.4311 | -2558.13 | 441.8701 | 0.37478  | 20.54501 | 205.4501 | 56.80834 | 0.048969 | 0.420923 | -0.162031 | 19.94818 | 21.30313 | 47.1284  | 26.94662 | 1388.74 |
| 662.8454 | -2558.66 | 441.3401 | 0.37478  | 20.54501 | 205.4501 | 56.77965 | 0.048948 | 0.420909 | -0.161981 | 19.93811 | 21.29237 | 47.19931 | 26.95932 | 1388.74 |
| 664.2596 | -2559.19 | 440.8101 | 0.396014 | 21.60425 | 216.0425 | 56.75096 | 0.048924 | 0.420892 | -0.08674  | 19.78656 | 21.28161 | 47.27051 | 26.97188 | 1388.74 |
| 665.6739 | -2559.75 | 440.25   | 0.657549 | 33.32687 | 333.2687 | 56.73559 | 0.048899 | 0.420876 | 0.741571  | 17.77703 | 21.27585 | 47.34581 | 26.97811 | 1388.74 |
| 667.0881 | -2560.68 | 439.3201 | 0.330081 | 18.2671  | 182.671  | 56.86704 | 0.048886 | 0.420867 | -0.323288 | 20.25047 | 21.32514 | 47.42019 | 26.91517 | 1388.74 |
| 668.0881 | -2561.01 | 438.99   | 0.304002 | 16.90937 | 169.0937 | 56.82661 | 0.048999 | 0.420943 | -0.419571 | 20.38867 | 21.30998 | 47.46941 | 26.93924 | 1388.74 |
| 669.5023 | -2561.44 | 438.5601 | 0.360625 | 19.83055 | 198.3055 | 56.75236 | 0.048964 | 0.42092  | -0.212699 | 20.02011 | 21.28214 | 47.5394  | 26.97297 | 1388.74 |
| 670.9166 | -2561.95 | 438.05   | 0.452637 | 24.35325 | 243.5325 | 56.71467 | 0.0489   | 0.420876 | 0.108503  | 19.37558 | 21.268   | 47.6112  | 26.98811 | 1388.74 |
| 672.3308 | -2562.59 | 437.4099 | 0.332313 | 18.38233 | 183.8233 | 56.73391 | 0.048868 | 0.420854 | -0.315087 | 20.18961 | 21.27522 | 47.68269 | 26.97755 | 1388.74 |
| 673.745  | -2563.06 | 436.9399 | 0.438308 | 23.66824 | 236.6824 | 56.67806 | 0.048884 | 0.420866 | 0.059908  | 19.46647 | 21.25427 | 47.75401 | 27.00486 | 1388.74 |
| 675.1593 | -2563.68 | 436.3201 | 0.424328 | 22.99288 | 229.9288 | 56.68869 | 0.048836 | 0.420833 | 0.012066  | 19.56936 | 21.25826 | 47.82647 | 26.9977  | 1388.74 |
| 676.5735 | -2564.28 | 435.72   | 0.417247 | 22.64821 | 226.4821 | 56.69083 | 0.048845 | 0.420839 | -0.01243  | 19.6197  | 21.25906 | 47.89865 | 26.99708 | 1388.74 |
| 677.9878 | -2564.87 | 435.1299 | 0.360452 | 19.8218  | 198.218  | 56.68862 | 0.048847 | 0.42084  | -0.213039 | 19.99872 | 21.25823 | 47.97004 | 26.99821 | 1388.74 |
| 679.402  | -2565.38 | 434.6201 | 0.424325 | 22.99274 | 229.9274 | 56.65083 | 0.048845 | 0.420839 | 0.012034  | 19.55631 | 21.24406 | 48.04155 | 27.01613 | 1388.74 |
| 680.8162 | -2565.98 | 434.02   | 0.452637 | 24.35325 | 243.5325 | 56.65296 | 0.048813 | 0.420817 | 0.108706  | 19.3545  | 21.24486 | 48.11424 | 27.0137  | 1388.74 |
| 682.2305 | -2566.62 | 433.3799 | 0.395841 | 21.5957  | 215.957  | 56.67226 | 0.048814 | 0.420818 | -0.087089 | 19.76029 | 21.2521  | 48.18655 | 27.00458 | 1388.74 |
| 683.6447 | -2567.18 | 432.8201 | 0.37478  | 20.54501 | 205.4501 | 56.65681 | 0.048831 | 0.420829 | -0.161701 | 19.89497 | 21.2463  | 48.25788 | 27.01267 | 1388.74 |
| 685.059  | -2567.71 | 432.29   | 0.353547 | 19.47088 | 194.7088 | 56.6281  | 0.048818 | 0.42082  | -0.237849 | 20.0211  | 21.23554 | 48.32874 | 27.02578 | 1388.74 |
| 686.4732 | -2568.21 | 431.79   | 0.396014 | 21.60425 | 216.0425 | 56.58586 | 0.048793 | 0.420804 | -0.086431 | 19.729   | 21.2197  | 48.3999  | 27.04487 | 1388.74 |
| 687.8874 | -2568.77 | 431.23   | 0.452464 | 24.34504 | 243.4504 | 56.5705  | 0.048757 | 0.420779 | 0.108253  | 19.32759 | 21.21394 | 48.47232 | 27.05063 | 1388.74 |
| 689.3017 | -2569.41 | 430.5901 | 0.47387  | 25.35487 | 253.5487 | 56.58975 | 0.048743 | 0.42077  | 0.179944  | 19.17698 | 21.22116 | 48.54577 | 27.04085 | 1388.74 |
| 690.7159 | -2570.08 | 429.9199 | 0.58677  | 30.40314 | 304.0314 | 56.62173 | 0.04876  | 0.420781 | 0.536862  | 18.31329 | 21.23315 | 48.62122 | 27.0263  | 1388.74 |
| 692.1302 | -2570.91 | 429.0901 | 0.43018  | 23.27641 | 232.7641 | 56.71708 | 0.048787 | 0.4208   | 0.032313  | 19.53781 | 21.26891 | 48.69595 | 26.98207 | 1388.74 |
| 693.1301 | -2571.34 | 428.6599 | 0.226147 | 12.74293 | 127.4293 | 56.72113 | 0.04887  | 0.420856 | -0.712173 | 20.74652 | 21.27042 | 48.74559 | 26.98372 | 1388.74 |
| 694.5444 | -2571.66 | 428.3401 | 0.516164 | 27.30118 | 273.0118 | 56.59486 | 0.048873 | 0.420858 | 0.317588  | 18.85899 | 21.22307 | 48.81701 | 27.04407 | 1388.74 |
| 695.9586 | -2572.39 | 427.6101 | 0.417247 | 22.64821 | 226.4821 | 56.6513  | 0.048764 | 0.420784 | -0.01224  | 19.60602 | 21.24424 | 48.89054 | 27.01239 | 1388.74 |
| 697.3729 | -2572.98 | 427.02   | 0.452637 | 24.35325 | 243.5325 | 56.64912 | 0.048813 | 0.420817 | 0.108705  | 19.35319 | 21.24342 | 48.96314 | 27.01554 | 1388.74 |
| 698.7871 | -2573.62 | 426.3799 | 0.409997 | 22.29348 | 222.9348 | 56.66842 | 0.048811 | 0.420816 | -0.037539 | 19.66223 | 21.25066 | 49.03564 | 27.00626 | 1388.74 |

|          |          |          |          |          |          |          |          |          |           |          |          |          |          |         |
|----------|----------|----------|----------|----------|----------|----------|----------|----------|-----------|----------|----------|----------|----------|---------|
| 700.2013 | -2574.2  | 425.8    | 0.431403 | 23.33551 | 233.3551 | 56.66176 | 0.048828 | 0.420827 | 0.036415  | 19.51008 | 21.24816 | 49.10785 | 27.01016 | 1388.74 |
| 701.6156 | -2574.81 | 425.1899 | 0.452464 | 24.34504 | 243.4504 | 56.66822 | 0.048822 | 0.420823 | 0.108102  | 19.36097 | 21.25058 | 49.18061 | 27.00683 | 1388.74 |
| 703.0298 | -2575.45 | 424.55   | 0.449956 | 24.22563 | 242.2563 | 56.68741 | 0.048828 | 0.420827 | 0.099613  | 19.38575 | 21.25778 | 49.25361 | 26.99794 | 1388.74 |
| 704.0298 | -2575.9  | 424.1001 | 0.590094 | 30.54459 | 305.4459 | 56.6999  | 0.048844 | 0.420838 | 0.546632  | 18.31196 | 21.26246 | 49.30666 | 26.99271 | 1388.74 |
| 705.0298 | -2576.49 | 423.51   | 0.639905 | 32.6154  | 326.154  | 56.76846 | 0.048855 | 0.420846 | 0.691934  | 17.93119 | 21.28817 | 49.36185 | 26.96058 | 1388.74 |
| 706.0298 | -2577.13 | 422.8701 | 0.530035 | 27.92514 | 279.2514 | 56.85513 | 0.048914 | 0.420886 | 0.361648  | 18.8381  | 21.32068 | 49.41624 | 26.92204 | 1388.74 |
| 707.0298 | -2577.66 | 422.3401 | 0.300052 | 16.70197 | 167.0197 | 56.90037 | 0.048989 | 0.420936 | -0.434193 | 20.43746 | 21.33764 | 49.46716 | 26.90388 | 1388.74 |
| 708.0298 | -2577.96 | 422.04   | 0.261707 | 14.66581 | 146.6581 | 56.8461  | 0.049028 | 0.420963 | -0.57775  | 20.62275 | 21.31729 | 49.51587 | 26.93125 | 1388.74 |
| 709.444  | -2578.33 | 421.6699 | 0.579692 | 30.10054 | 301.0054 | 56.74389 | 0.048981 | 0.420931 | 0.515069  | 18.40942 | 21.27896 | 49.58833 | 26.97773 | 1388.74 |
| 710.8582 | -2579.15 | 420.8501 | 0.544476 | 28.56723 | 285.6723 | 56.83518 | 0.048893 | 0.420871 | 0.407087  | 18.71845 | 21.31319 | 49.66452 | 26.93057 | 1388.74 |
| 712.2725 | -2579.92 | 420.0801 | 0.41725  | 22.64835 | 226.4835 | 56.90721 | 0.048971 | 0.420925 | -0.012717 | 19.69457 | 21.3402  | 49.73815 | 26.8999  | 1388.74 |
| 713.6867 | -2580.51 | 419.49   | 0.459966 | 24.7008  | 247.008  | 56.90496 | 0.049033 | 0.420967 | 0.132864  | 19.38686 | 21.33936 | 49.81052 | 26.90365 | 1388.74 |
| 714.6867 | -2580.97 | 419.03   | 0.141384 | 8.047379 | 80.47379 | 56.92157 | 0.049032 | 0.420966 | -1.038106 | 21.13539 | 21.34559 | 49.85988 | 26.89572 | 1388.74 |
| 716.1009 | -2581.17 | 418.8301 | 0.469975 | 25.17237 | 251.7237 | 56.73816 | 0.049046 | 0.420975 | 0.1663    | 19.2562  | 21.27681 | 49.9299  | 26.98328 | 1388.74 |
| 717.1009 | -2581.64 | 418.3601 | 0.62941  | 32.18672 | 321.8672 | 56.759   | 0.048888 | 0.420868 | 0.661847  | 18.01353 | 21.28462 | 49.98357 | 26.9665  | 1388.74 |
| 718.5152 | -2582.53 | 417.47   | 0.219975 | 12.40606 | 124.0606 | 56.87627 | 0.048906 | 0.42088  | -0.735802 | 20.83057 | 21.3286  | 50.05638 | 26.91168 | 1388.74 |
| 719.5151 | -2582.75 | 417.25   | 0.226318 | 12.75226 | 127.5226 | 56.78427 | 0.049007 | 0.420949 | -0.711861 | 20.76885 | 21.2941  | 50.10446 | 26.95967 | 1388.74 |
| 720.9294 | -2583.07 | 416.9299 | 0.530035 | 27.92514 | 279.2514 | 56.6582  | 0.048928 | 0.420895 | 0.361618  | 18.77285 | 21.24682 | 50.17599 | 27.01621 | 1388.74 |
| 721.9294 | -2583.6  | 416.3999 | 0.445386 | 24.00753 | 240.0753 | 56.70359 | 0.048819 | 0.420821 | 0.084149  | 19.42435 | 21.26384 | 50.22835 | 26.98986 | 1388.74 |
| 723.3436 | -2584.23 | 415.77   | 0.233396 | 13.13743 | 131.3743 | 56.71851 | 0.048858 | 0.420848 | -0.684546 | 20.71277 | 21.26944 | 50.29882 | 26.98446 | 1388.74 |
| 724.7579 | -2584.56 | 415.4399 | 0.388936 | 21.25285 | 212.5285 | 56.59713 | 0.048871 | 0.420857 | -0.111561 | 19.78048 | 21.22392 | 50.36867 | 27.04289 | 1388.74 |
| 726.1721 | -2585.11 | 414.8899 | 0.395841 | 21.5957  | 215.957  | 56.57731 | 0.048766 | 0.420786 | -0.086975 | 19.72718 | 21.21649 | 50.44026 | 27.0478  | 1388.74 |
| 727.5863 | -2585.67 | 414.3301 | 0.37478  | 20.54501 | 205.4501 | 56.56185 | 0.048749 | 0.420774 | -0.161506 | 19.86163 | 21.21069 | 50.51171 | 27.05445 | 1388.74 |
| 729.0006 | -2586.2  | 413.8    | 0.424325 | 22.99274 | 229.9274 | 56.53313 | 0.048736 | 0.420765 | 0.012291  | 19.51568 | 21.19992 | 50.58354 | 27.06761 | 1388.74 |
| 730.4148 | -2586.8  | 413.2    | 0.388936 | 21.25285 | 212.5285 | 56.53532 | 0.048711 | 0.420748 | -0.111182 | 19.75888 | 21.20074 | 50.65556 | 27.06548 | 1388.74 |
| 731.8291 | -2587.35 | 412.6499 | 0.657549 | 33.32687 | 333.2687 | 56.51554 | 0.048713 | 0.420749 | 0.741966  | 17.70808 | 21.19333 | 50.73105 | 27.07503 | 1388.74 |
| 733.2433 | -2588.28 | 411.72   | 0.473697 | 25.3468  | 253.468  | 56.64757 | 0.048696 | 0.420738 | 0.17948   | 19.19786 | 21.24284 | 50.80769 | 27.01118 | 1388.74 |
| 734.6575 | -2588.95 | 411.05   | 0.47387  | 25.35487 | 253.5487 | 56.67944 | 0.04881  | 0.420815 | 0.179792  | 19.20738 | 21.25479 | 50.88134 | 27.00096 | 1388.74 |
| 736.0718 | -2589.62 | 410.3799 | 0.37461  | 20.53647 | 205.3647 | 56.71134 | 0.048837 | 0.420834 | -0.162322 | 19.91523 | 21.26675 | 50.95364 | 26.98696 | 1388.74 |
| 737.486  | -2590.15 | 409.8501 | 0.31833  | 17.65784 | 176.5784 | 56.68255 | 0.048865 | 0.420852 | -0.366344 | 20.25448 | 21.25596 | 51.02405 | 27.00187 | 1388.74 |
| 738.9002 | -2590.6  | 409.3999 | 0.445386 | 24.00753 | 240.0753 | 56.61755 | 0.04884  | 0.420835 | 0.0841    | 19.39488 | 21.23158 | 51.09539 | 27.03178 | 1388.74 |
| 740.3145 | -2591.23 | 408.77   | 0.37478  | 20.54501 | 205.4501 | 56.63249 | 0.048784 | 0.420797 | -0.161589 | 19.88643 | 21.23718 | 51.16739 | 27.02221 | 1388.74 |
| 741.7287 | -2591.76 | 408.24   | 0.396014 | 21.60425 | 216.0425 | 56.6038  | 0.048797 | 0.420806 | -0.08644  | 19.73525 | 21.22642 | 51.23878 | 27.03647 | 1388.74 |
| 743.143  | -2592.32 | 407.6799 | 0.339391 | 18.74676 | 187.4676 | 56.58844 | 0.048772 | 0.420789 | -0.28905  | 20.09487 | 21.22067 | 51.3098  | 27.04273 | 1388.74 |
| 744.5572 | -2592.8  | 407.2    | 0.229983 | 12.95183 | 129.5183 | 56.53707 | 0.048759 | 0.42078  | -0.697288 | 20.66201 | 21.2014  | 51.37919 | 27.06672 | 1388.74 |
| 745.5572 | -2593.03 | 406.97   | 0.339391 | 18.74676 | 187.4676 | 56.44937 | 0.048715 | 0.42075  | -0.288911 | 20.04549 | 21.16851 | 51.42832 | 27.10684 | 1388.74 |
| 746.9714 | -2593.51 | 406.49   | 0.389896 | 21.30063 | 213.0063 | 56.3979  | 0.048639 | 0.420699 | -0.107619 | 19.70445 | 21.14921 | 51.49948 | 27.12826 | 1388.74 |
| 747.9714 | -2593.9  | 406.1001 | 0.396017 | 21.60439 | 216.0439 | 56.38433 | 0.048595 | 0.420669 | -0.085951 | 19.65871 | 21.14412 | 51.55029 | 27.13285 | 1388.74 |
| 749.3857 | -2594.46 | 405.54   | 0.396014 | 21.60425 | 216.0425 | 56.369   | 0.048583 | 0.420661 | -0.085933 | 19.65339 | 21.13837 | 51.62224 | 27.13971 | 1388.74 |
| 750.7999 | -2595.02 | 404.98   | 0.37478  | 20.54501 | 205.4501 | 56.35367 | 0.04857  | 0.420652 | -0.161077 | 19.78852 | 21.13262 | 51.69395 | 27.14652 | 1388.74 |
| 752.2141 | -2595.55 | 404.45   | 0.381858 | 20.89976 | 208.9976 | 56.32492 | 0.048556 | 0.420643 | -0.135874 | 19.73215 | 21.12185 | 51.76552 | 27.15979 | 1388.74 |
| 753.6284 | -2596.09 | 403.9099 | 0.438308 | 23.66824 | 236.6824 | 56.30066 | 0.048532 | 0.420626 | 0.060731  | 19.33685 | 21.11275 | 51.83792 | 27.17041 | 1388.74 |
| 755.0426 | -2596.71 | 403.29   | 0.487853 | 26.00558 | 260.0558 | 56.31151 | 0.048511 | 0.420612 | 0.226625  | 18.97877 | 21.11682 | 51.91174 | 27.16425 | 1388.74 |
| 756.4569 | -2597.4  | 402.6001 | 0.459714 | 24.68892 | 246.8892 | 56.35198 | 0.04852  | 0.420618 | 0.133209  | 19.2003  | 21.13199 | 51.98582 | 27.14515 | 1388.74 |
| 757.8711 | -2598.05 | 401.95   | 0.417075 | 22.63978 | 226.3978 | 56.37575 | 0.048555 | 0.420642 | -0.012346 | 19.51186 | 21.14091 | 52.05889 | 27.13524 | 1388.74 |
| 759.2853 | -2598.64 | 401.3601 | 0.403092 | 21.95395 | 219.5395 | 56.37355 | 0.048576 | 0.420656 | -0.061089 | 19.6071  | 21.14008 | 52.13119 | 27.1372  | 1388.74 |
| 760.6996 | -2599.21 | 400.79   | 0.473697 | 25.3468  | 253.468  | 56.36265 | 0.048574 | 0.420655 | 0.179762  | 19.1013  | 21.136   | 52.20426 | 27.14236 | 1388.74 |
| 762.1138 | -2599.88 | 400.1201 | 0.488026 | 26.01357 | 260.1357 | 56.39473 | 0.048564 | 0.420648 | 0.227068  | 19.00552 | 21.14802 | 52.27849 | 27.12651 | 1388.74 |
| 763.5281 | -2600.57 | 399.4299 | 0.859872 | 40.69131 | 406.9131 | 56.43522 | 0.048592 | 0.420667 | 1.248824  | 16.04665 | 21.16321 | 52.35918 | 27.10826 | 1388.74 |
| 764.528  | -2601.43 | 398.5701 | 0.162618 | 9.236457 | 92.36457 | 56.59258 | 0.048627 | 0.420691 | -0.955226 | 20.94706 | 21.22222 | 52.41324 | 27.03441 | 1388.74 |
| 765.9423 | -2601.66 | 398.3401 | 0.660169 | 33.43157 | 334.3157 | 56.42283 | 0.048762 | 0.420783 | 0.74917   | 17.65776 | 21.15856 | 52.48651 | 27.12168 | 1388.74 |
| 766.9423 | -2602.32 | 397.6799 | 0.332313 | 18.38233 | 183.8233 | 56.51725 | 0.048616 | 0.420683 | -0.314478 | 20.11251 | 21.19397 | 52.53946 | 27.06997 | 1388.74 |
| 768.3565 | -2602.79 | 397.21   | 0.261535 | 14.65656 | 146.5656 | 56.46129 | 0.048697 | 0.420739 | -0.577588 | 20.48401 | 21.17298 | 52.60914 | 27.10037 | 1388.74 |
| 769.7707 | -2603.16 | 396.8401 | 0.290019 | 16.17315 | 161.7315 | 56.35841 | 0.048649 | 0.420706 | -0.470682 | 20.29799 | 21.1344  | 52.67849 | 27.14772 | 1388.74 |
| 771.185  | -2603.57 | 396.4299 | 0.388936 | 21.25285 | 212.5285 | 56.27442 | 0.048561 | 0.420646 | -0.110824 | 19.66769 | 21.10291 | 52.74926 | 27.18434 | 1388.74 |
| 772.5992 | -2604.12 | 395.8799 | 0.329837 | 18.25448 | 182.5448 | 56.25461 | 0.048488 | 0.420596 | -0.323219 | 20.03384 | 21.09548 | 52.82051 | 27.19073 | 1388.74 |
| 773.5992 | -2604.45 | 395.55   | 0.275863 | 15.42222 | 154.2222 | 56.21376 | 0.048471 | 0.420585 | -0.523165 | 20.32111 | 21.08016 | 52.87007 | 27.20974 | 1388.74 |
| 775.0135 | -2604.84 | 395.1599 | 0.31108  | 17.27986 | 172.7986 | 56.12016 | 0.048436 | 0.420561 | -0.392024 | 20.0952  | 21.04506 | 52.94005 | 27.25357 | 1388.74 |
| 776.4277 | -2605.28 | 394.72   | 0.41017  | 22.30194 | 223.0194 | 56.04991 | 0.048355 | 0.420506 | -0.035862 | 19.44645 | 21.01872 | 53.01158 | 27.28416 | 1388.74 |
| 777.8419 | -2605.86 | 394.1399 | 0.46662  | 25.01468 | 250.1468 | 56.04347 | 0.048295 | 0.420465 | 0.156846  | 19.04496 | 21.0163  | 53.08507 | 27.28462 | 1388.74 |

|          |          |          |          |          |          |          |          |          |           |          |          |          |          |         |
|----------|----------|----------|----------|----------|----------|----------|----------|----------|-----------|----------|----------|----------|----------|---------|
| 779.2562 | -2606.52 | 393.48   | 0.388939 | 21.25299 | 212.5299 | 56.07162 | 0.048289 | 0.420461 | -0.110169 | 19.5968  | 21.02686 | 53.15826 | 27.27068 | 1388.74 |
| 780.6704 | -2607.07 | 392.9299 | 0.469975 | 25.17237 | 251.7237 | 56.05186 | 0.048313 | 0.420477 | 0.16799   | 19.02328 | 21.01945 | 53.2315  | 27.28137 | 1388.74 |
| 781.6704 | -2607.54 | 392.46   | 0.014156 | 0.811007 | 8.110066 | 56.07317 | 0.048296 | 0.420466 | -1.52351  | 21.02533 | 21.02744 | 53.28144 | 27.27025 | 1388.74 |
| 783.0846 | -2607.56 | 392.4399 | 0.699958 | 34.99041 | 349.9041 | 55.79993 | 0.048315 | 0.420478 | 0.858612  | 17.14274 | 20.92497 | 53.35555 | 27.4046  | 1388.74 |
| 784.0846 | -2608.26 | 391.74   | 0.212163 | 11.9784  | 119.784  | 55.90935 | 0.048079 | 0.420318 | -0.763586 | 20.50949 | 20.96601 | 53.40866 | 27.34052 | 1388.74 |
| 785.4989 | -2608.56 | 391.4399 | 0.39991  | 21.79698 | 217.9698 | 55.772   | 0.048174 | 0.420382 | -0.071281 | 19.41922 | 20.9145  | 53.4795  | 27.41205 | 1388.74 |
| 786.4988 | -2608.96 | 391.04   | 0.370121 | 20.31057 | 203.1057 | 55.76291 | 0.048055 | 0.420301 | -0.176477 | 19.61094 | 20.91109 | 53.53074 | 27.41125 | 1388.74 |
| 787.4988 | -2609.33 | 390.6699 | 0.319827 | 17.7357  | 177.357  | 55.7404  | 0.048047 | 0.420296 | -0.358851 | 19.90919 | 20.90265 | 53.58135 | 27.42197 | 1388.74 |
| 788.4988 | -2609.65 | 390.3501 | 0.370121 | 20.31057 | 203.1057 | 55.69462 | 0.048028 | 0.420283 | -0.176412 | 19.58693 | 20.88548 | 53.63199 | 27.44365 | 1388.74 |
| 789.4988 | -2610.02 | 389.98   | 0.290045 | 16.17453 | 161.7453 | 55.6721  | 0.047989 | 0.420256 | -0.468964 | 20.05067 | 20.87704 | 53.68244 | 27.45299 | 1388.74 |
| 790.4988 | -2610.31 | 389.6899 | 0.205085 | 11.58979 | 115.8979 | 55.6122  | 0.047969 | 0.420243 | -0.790392 | 20.42937 | 20.85457 | 53.73185 | 27.4817  | 1388.74 |
| 791.913  | -2610.6  | 389.3999 | 0.339391 | 18.74676 | 187.4676 | 55.46927 | 0.047918 | 0.420207 | -0.286983 | 19.69745 | 20.80097 | 53.80234 | 27.5502  | 1388.74 |
| 793.3273 | -2611.08 | 388.9199 | 0.409997 | 22.29348 | 222.9348 | 55.41723 | 0.047794 | 0.420123 | -0.035136 | 19.22811 | 20.78146 | 53.875   | 27.57055 | 1388.74 |
| 794.7415 | -2611.66 | 388.3401 | 0.37478  | 20.54501 | 205.4501 | 55.41086 | 0.04775  | 0.420093 | -0.159114 | 19.45746 | 20.77907 | 53.94812 | 27.57171 | 1388.74 |
| 796.1558 | -2612.19 | 387.8101 | 0.318158 | 17.64886 | 176.4886 | 55.38198 | 0.047744 | 0.420089 | -0.364251 | 19.79073 | 20.76824 | 54.02018 | 27.58584 | 1388.74 |
| 797.57   | -2612.64 | 387.3601 | 0.31833  | 17.65784 | 176.5784 | 55.31584 | 0.047719 | 0.420072 | -0.363555 | 19.76611 | 20.74344 | 54.09169 | 27.6177  | 1388.74 |
| 798.9842 | -2613.09 | 386.9099 | 0.417075 | 22.63978 | 226.3978 | 55.24974 | 0.047662 | 0.420033 | -0.010238 | 19.12214 | 20.71865 | 54.16442 | 27.64818 | 1388.74 |
| 800.3985 | -2613.68 | 386.3201 | 0.388936 | 21.25285 | 212.5285 | 55.24787 | 0.047605 | 0.419994 | -0.108546 | 19.30892 | 20.71795 | 54.23802 | 27.64655 | 1388.74 |
| 801.8127 | -2614.23 | 385.77   | 0.445559 | 24.01578 | 240.1578 | 55.22812 | 0.047604 | 0.419993 | 0.087573  | 18.9177  | 20.71054 | 54.31201 | 27.65637 | 1388.74 |
| 803.227  | -2614.86 | 385.1399 | 0.424153 | 22.98435 | 229.8435 | 55.24406 | 0.047587 | 0.419981 | 0.014401  | 19.07187 | 20.71652 | 54.38647 | 27.64762 | 1388.74 |
| 804.6412 | -2615.46 | 384.54   | 0.431403 | 23.33551 | 233.3551 | 55.24668 | 0.0476   | 0.419991 | 0.039296  | 19.02284 | 20.71751 | 54.46072 | 27.64692 | 1388.74 |
| 806.0554 | -2616.07 | 383.9299 | 0.502009 | 26.65705 | 266.5705 | 55.25384 | 0.047603 | 0.419992 | 0.274871  | 18.5178  | 20.72019 | 54.53606 | 27.64345 | 1388.74 |
| 807.4697 | -2616.78 | 383.22   | 0.53032  | 27.93791 | 279.3791 | 55.30387 | 0.047609 | 0.419996 | 0.365498  | 18.32195 | 20.73895 | 54.61284 | 27.61872 | 1388.74 |
| 808.8839 | -2617.53 | 382.47   | 0.643398 | 32.75713 | 327.5713 | 55.37033 | 0.047652 | 0.420026 | 0.704435  | 17.46183 | 20.76387 | 54.69188 | 27.5875  | 1388.74 |
| 810.2981 | -2618.44 | 381.5601 | 0.390141 | 21.31278 | 213.1278 | 55.49828 | 0.047709 | 0.420065 | -0.104542 | 19.38853 | 20.81185 | 54.76864 | 27.52647 | 1388.74 |
| 811.2981 | -2618.83 | 381.1699 | 0.254457 | 14.27634 | 142.7634 | 55.48488 | 0.047819 | 0.42014  | -0.602125 | 20.16427 | 20.80683 | 54.8192  | 27.53805 | 1388.74 |
| 812.7124 | -2619.19 | 380.8101 | 0.282941 | 15.79838 | 157.9838 | 55.37574 | 0.047808 | 0.420132 | -0.495034 | 19.98149 | 20.7659  | 54.88966 | 27.59181 | 1388.74 |
| 814.1266 | -2619.59 | 380.4099 | 0.479985 | 25.64032 | 256.4032 | 55.28584 | 0.047714 | 0.420068 | 0.202563  | 18.69065 | 20.73219 | 54.9628  | 27.63245 | 1388.74 |
| 815.1266 | -2620.07 | 379.9299 | 0.176773 | 10.0248  | 100.248  | 55.31189 | 0.047636 | 0.420015 | -0.898231 | 20.42528 | 20.74196 | 55.01393 | 27.61595 | 1388.74 |
| 816.5408 | -2620.32 | 379.6799 | 0.37478  | 20.54501 | 205.4501 | 55.14858 | 0.047659 | 0.420031 | -0.158896 | 19.36536 | 20.68072 | 55.08501 | 27.69874 | 1388.74 |
| 817.9551 | -2620.85 | 379.1499 | 0.346469 | 19.10961 | 191.0961 | 55.1196  | 0.047518 | 0.419934 | -0.260314 | 19.53082 | 20.66985 | 55.15773 | 27.70695 | 1388.74 |
| 819.3693 | -2621.34 | 378.6599 | 0.381686 | 20.89113 | 208.9113 | 55.07211 | 0.047493 | 0.419917 | -0.133944 | 19.29437 | 20.65204 | 55.23058 | 27.72972 | 1388.74 |
| 820.7836 | -2621.88 | 378.1201 | 0.346644 | 19.11857 | 191.1857 | 55.04765 | 0.047452 | 0.419889 | -0.259519 | 19.50427 | 20.64287 | 55.30348 | 27.74019 | 1388.74 |
| 822.1978 | -2622.37 | 377.6299 | 0.36753  | 20.17989 | 201.7989 | 55.00023 | 0.047431 | 0.419875 | -0.184244 | 19.359   | 20.62509 | 55.37626 | 27.76314 | 1388.74 |
| 823.612  | -2622.89 | 377.1101 | 0.424325 | 22.99274 | 229.9274 | 54.96655 | 0.04739  | 0.419847 | 0.01546   | 18.97489 | 20.61245 | 55.45005 | 27.77831 | 1388.74 |
| 825.0263 | -2623.49 | 376.51   | 0.417247 | 22.64821 | 226.4821 | 54.96937 | 0.047361 | 0.419827 | -0.008927 | 19.02394 | 20.61352 | 55.52448 | 27.77556 | 1388.74 |
| 826.4405 | -2624.08 | 375.9199 | 0.43123  | 23.32717 | 233.2717 | 54.96774 | 0.047364 | 0.419829 | 0.039262  | 18.92798 | 20.6129  | 55.59901 | 27.7765  | 1388.74 |
| 827.8548 | -2624.69 | 375.3101 | 0.417247 | 22.64821 | 226.4821 | 54.97492 | 0.047362 | 0.419828 | -0.00893  | 19.02586 | 20.6156  | 55.67354 | 27.77281 | 1388.74 |
| 829.269  | -2625.28 | 374.72   | 0.37478  | 20.54501 | 205.4501 | 54.97329 | 0.047369 | 0.419832 | -0.158198 | 19.30381 | 20.61498 | 55.74733 | 27.77391 | 1388.74 |
| 830.6832 | -2625.81 | 374.1899 | 0.339391 | 18.74676 | 187.4676 | 54.94435 | 0.047367 | 0.419831 | -0.285646 | 19.51105 | 20.60413 | 55.8202  | 27.78848 | 1388.74 |
| 832.0975 | -2626.29 | 373.71   | 0.367702 | 20.1886  | 201.886  | 54.89207 | 0.047342 | 0.419814 | -0.183411 | 19.31985 | 20.58452 | 55.89304 | 27.81381 | 1388.74 |
| 833.5117 | -2626.81 | 373.1899 | 0.367702 | 20.1886  | 201.886  | 54.85846 | 0.047297 | 0.419783 | -0.183303 | 19.30802 | 20.57192 | 55.96627 | 27.8288  | 1388.74 |
| 834.926  | -2627.33 | 372.6699 | 0.37478  | 20.54501 | 205.4501 | 54.82486 | 0.047268 | 0.419763 | -0.157956 | 19.25168 | 20.55932 | 56.03962 | 27.84454 | 1388.74 |
| 836.3402 | -2627.86 | 372.1399 | 0.381686 | 20.89113 | 208.9113 | 54.79589 | 0.047239 | 0.419743 | -0.133334 | 19.19759 | 20.54846 | 56.11318 | 27.85795 | 1388.74 |
| 837.7544 | -2628.4  | 371.6001 | 0.275863 | 15.42222 | 154.2222 | 54.77141 | 0.047214 | 0.419726 | -0.52006  | 19.79971 | 20.53928 | 56.18571 | 27.86926 | 1388.74 |
| 839.1687 | -2628.79 | 371.21   | 0.275691 | 15.41303 | 154.1303 | 54.67592 | 0.047193 | 0.419712 | -0.520655 | 19.76606 | 20.50347 | 56.2572  | 27.91697 | 1388.74 |
| 840.5829 | -2629.18 | 370.8201 | 0.544476 | 28.56722 | 285.6722 | 54.58016 | 0.047111 | 0.419655 | 0.411092  | 17.97577 | 20.46756 | 56.33214 | 27.96219 | 1388.74 |
| 841.9972 | -2629.95 | 370.05   | 0.466792 | 25.0228  | 250.228  | 54.6559  | 0.047028 | 0.419598 | 0.160365  | 18.5722  | 20.49596 | 56.40953 | 27.91967 | 1388.74 |
| 843.4114 | -2630.61 | 369.3899 | 0.374608 | 20.53634 | 205.3634 | 54.68541 | 0.047094 | 0.419643 | -0.158151 | 19.20381 | 20.50703 | 56.48441 | 27.90758 | 1388.74 |
| 844.8256 | -2631.14 | 368.8601 | 0.388939 | 21.25299 | 212.5299 | 54.65633 | 0.047119 | 0.419661 | -0.107372 | 19.10216 | 20.49612 | 56.55825 | 27.9236  | 1388.74 |
| 846.2399 | -2631.69 | 368.3101 | 0.332313 | 18.38233 | 183.8233 | 54.63657 | 0.047094 | 0.419644 | -0.310778 | 19.44324 | 20.48871 | 56.63163 | 27.93255 | 1388.74 |
| 847.6541 | -2632.16 | 367.8401 | 0.37478  | 20.54501 | 205.4501 | 54.57937 | 0.047077 | 0.419632 | -0.157496 | 19.16548 | 20.46726 | 56.70489 | 27.96105 | 1388.74 |
| 849.0683 | -2632.69 | 367.3101 | 0.417247 | 22.64821 | 226.4821 | 54.55035 | 0.047028 | 0.419598 | -0.008135 | 18.87892 | 20.45638 | 56.77924 | 27.97366 | 1388.74 |
| 850.4826 | -2633.28 | 366.72   | 0.43123  | 23.32717 | 233.2717 | 54.54885 | 0.047003 | 0.419581 | 0.040115  | 18.78373 | 20.45582 | 56.85434 | 27.97329 | 1388.74 |
| 851.8968 | -2633.89 | 366.1101 | 0.381858 | 20.89976 | 208.9976 | 54.55624 | 0.047001 | 0.41958  | -0.13215  | 19.11254 | 20.45859 | 56.92897 | 27.96944 | 1388.74 |
| 853.3111 | -2634.43 | 365.5701 | 0.318158 | 17.64886 | 176.4886 | 54.53188 | 0.047008 | 0.419584 | -0.362448 | 19.48695 | 20.44946 | 57.00225 | 27.98222 | 1388.74 |
| 854.7253 | -2634.88 | 365.1201 | 0.297097 | 16.54651 | 165.4651 | 54.46504 | 0.046987 | 0.41957  | -0.440256 | 19.57859 | 20.42439 | 57.07465 | 28.0156  | 1388.74 |
| 856.1395 | -2635.3  | 364.7    | 0.268613 | 15.03546 | 150.3546 | 54.38375 | 0.046929 | 0.41953  | -0.546566 | 19.69573 | 20.39391 | 57.14667 | 28.05483 | 1388.74 |
| 857.5538 | -2635.68 | 364.3201 | 0.304175 | 16.91842 | 169.1842 | 54.28267 | 0.046859 | 0.419482 | -0.413689 | 19.475   | 20.356   | 57.21888 | 28.10385 | 1388.74 |
| 858.968  | -2636.11 | 363.8899 | 0.353547 | 19.47088 | 194.7088 | 54.20603 | 0.046772 | 0.419422 | -0.232906 | 19.16477 | 20.32726 | 57.29208 | 28.13957 | 1388.74 |

|          |          |          |          |          |          |          |          |          |           |          |          |          |          |         |
|----------|----------|----------|----------|----------|----------|----------|----------|----------|-----------|----------|----------|----------|----------|---------|
| 860.3823 | -2636.61 | 363.3899 | 0.402919 | 21.94544 | 219.4544 | 54.16282 | 0.046706 | 0.419377 | -0.057245 | 18.83932 | 20.31106 | 57.36651 | 28.15897 | 1388.74 |
| 861.7965 | -2637.18 | 362.8201 | 0.431403 | 23.33551 | 233.3551 | 54.15219 | 0.046669 | 0.419351 | 0.041497  | 18.64597 | 20.30707 | 57.44196 | 28.16277 | 1388.74 |
| 863.2107 | -2637.79 | 362.21   | 0.55006  | 28.81343 | 288.1343 | 54.1599  | 0.04666  | 0.419345 | 0.429493  | 17.79546 | 20.30996 | 57.51958 | 28.15834 | 1388.74 |
| 864.2107 | -2638.34 | 361.6599 | 0.134306 | 7.649412 | 76.49412 | 54.21629 | 0.046666 | 0.41935  | -1.0594   | 20.15018 | 20.33111 | 57.57229 | 28.12936 | 1388.74 |
| 865.625  | -2638.53 | 361.47   | 0.939951 | 43.22703 | 432.2703 | 54.01978 | 0.046715 | 0.419383 | 1.42241   | 14.76048 | 20.25742 | 57.65331 | 28.23394 | 1388.74 |
| 866.625  | -2639.47 | 360.53   | 0.275863 | 15.42222 | 154.2222 | 54.20702 | 0.046546 | 0.419266 | -0.518399 | 19.59568 | 20.32763 | 57.71152 | 28.12859 | 1388.74 |
| 868.0392 | -2639.86 | 360.1399 | 0.21199  | 11.96894 | 119.6894 | 54.11084 | 0.046707 | 0.419377 | -0.760796 | 19.85043 | 20.29157 | 57.78323 | 28.18605 | 1388.74 |
| 869.4534 | -2640.16 | 359.8401 | 0.31833  | 17.65784 | 176.5784 | 53.96944 | 0.046624 | 0.41932  | -0.36087  | 19.285   | 20.23854 | 57.8555  | 28.25606 | 1388.74 |
| 870.8677 | -2640.61 | 359.3899 | 0.346469 | 19.10961 | 191.0961 | 53.9022  | 0.046502 | 0.419237 | -0.257841 | 19.09945 | 20.21332 | 57.92919 | 28.28565 | 1388.74 |
| 872.2819 | -2641.1  | 358.8999 | 0.360625 | 19.83055 | 198.3055 | 53.85409 | 0.046444 | 0.419197 | -0.20662  | 18.9977  | 20.19528 | 58.00343 | 28.30822 | 1388.74 |
| 873.6962 | -2641.61 | 358.3899 | 0.332313 | 18.38233 | 183.8233 | 53.81551 | 0.046403 | 0.419168 | -0.309086 | 19.15105 | 20.18081 | 58.07758 | 28.32659 | 1388.74 |
| 875.1104 | -2642.08 | 357.9199 | 0.296924 | 16.53742 | 165.3742 | 53.75775 | 0.04637  | 0.419145 | -0.43937  | 19.32525 | 20.15915 | 58.15109 | 28.35547 | 1388.74 |
| 876.5246 | -2642.5  | 357.5    | 0.339391 | 18.74676 | 187.4676 | 53.67555 | 0.04632  | 0.419111 | -0.283089 | 19.06049 | 20.12833 | 58.22477 | 28.39657 | 1388.74 |
| 877.9389 | -2642.98 | 357.02   | 0.353547 | 19.47088 | 194.7088 | 53.62251 | 0.046249 | 0.419062 | -0.231632 | 18.95846 | 20.10844 | 58.29917 | 28.42134 | 1388.74 |
| 879.3531 | -2643.48 | 356.52   | 0.353547 | 19.47088 | 194.7088 | 53.57907 | 0.046203 | 0.41903  | -0.23152  | 18.9431  | 20.09215 | 58.3738  | 28.44225 | 1388.74 |
| 880.7674 | -2643.98 | 356.02   | 0.332316 | 18.38245 | 183.8245 | 53.53561 | 0.046166 | 0.419005 | -0.308496 | 19.05144 | 20.07585 | 58.44824 | 28.46358 | 1388.74 |
| 882.1816 | -2644.45 | 355.55   | 0.37478  | 20.54501 | 205.4501 | 53.47766 | 0.046128 | 0.418979 | -0.155202 | 18.77862 | 20.05412 | 58.52301 | 28.49266 | 1388.74 |
| 883.5958 | -2644.98 | 355.02   | 0.353547 | 19.47088 | 194.7088 | 53.44847 | 0.046078 | 0.418944 | -0.231216 | 18.89693 | 20.04318 | 58.59808 | 28.50588 | 1388.74 |
| 885.0101 | -2645.48 | 354.52   | 0.388936 | 21.25285 | 212.5285 | 53.40497 | 0.046053 | 0.418927 | -0.104817 | 18.66483 | 20.02686 | 58.67339 | 28.52792 | 1388.74 |
| 886.4243 | -2646.03 | 353.97   | 0.346469 | 19.10961 | 191.0961 | 53.38523 | 0.046016 | 0.418901 | -0.256652 | 18.91627 | 20.01946 | 58.74865 | 28.5367  | 1388.74 |
| 887.8385 | -2646.52 | 353.48   | 0.396014 | 21.60425 | 216.0425 | 53.33688 | 0.045999 | 0.418889 | -0.079757 | 18.59622 | 20.00133 | 58.82405 | 28.56177 | 1388.74 |
| 889.2528 | -2647.08 | 352.9199 | 0.309818 | 17.2139  | 172.139  | 53.32184 | 0.045957 | 0.41886  | -0.390594 | 19.10002 | 19.99569 | 58.89908 | 28.56786 | 1388.74 |
| 890.2528 | -2647.39 | 352.6101 | 0.340091 | 18.78272 | 187.8272 | 53.26975 | 0.045944 | 0.418852 | -0.279622 | 18.91235 | 19.97616 | 58.9517  | 28.59518 | 1388.74 |
| 891.2528 | -2647.73 | 352.27   | 0.350105 | 19.29539 | 192.9539 | 53.23242 | 0.045899 | 0.41882  | -0.24321  | 18.84084 | 19.96216 | 59.00467 | 28.61311 | 1388.74 |
| 892.2527 | -2648.08 | 351.9199 | 0.31108  | 17.27986 | 172.7986 | 53.19994 | 0.045867 | 0.418798 | -0.385713 | 19.04954 | 19.94998 | 59.05746 | 28.62907 | 1388.74 |
| 893.667  | -2648.52 | 351.48   | 0.332313 | 18.38233 | 183.8233 | 53.12702 | 0.045839 | 0.418779 | -0.307701 | 18.90605 | 19.92263 | 59.13198 | 28.66703 | 1388.74 |
| 895.0812 | -2648.99 | 351.01   | 0.353547 | 19.47088 | 194.7088 | 53.06877 | 0.045776 | 0.418735 | -0.230477 | 18.76268 | 19.90079 | 59.20706 | 28.69552 | 1388.74 |
| 896.4955 | -2649.49 | 350.51   | 0.350101 | 19.29521 | 192.9521 | 53.0251  | 0.045726 | 0.418701 | -0.242798 | 18.76748 | 19.88441 | 59.28243 | 28.71677 | 1388.74 |
| 897.4955 | -2649.84 | 350.1599 | 0.359867 | 19.79212 | 197.9212 | 52.99254 | 0.045688 | 0.418675 | -0.207502 | 18.6983  | 19.8722  | 59.33581 | 28.73263 | 1388.74 |
| 898.4954 | -2650.2  | 349.8    | 0.330085 | 18.26727 | 182.6727 | 52.96469 | 0.04566  | 0.418655 | -0.315401 | 18.86082 | 19.86176 | 59.38906 | 28.7464  | 1388.74 |
| 899.4954 | -2650.53 | 349.47   | 0.282768 | 15.78922 | 157.8922 | 52.92235 | 0.045636 | 0.418639 | -0.490289 | 19.09708 | 19.84588 | 59.44175 | 28.76826 | 1388.74 |
| 900.9097 | -2650.93 | 349.0701 | 0.339391 | 18.74676 | 187.4676 | 52.82918 | 0.0456   | 0.418613 | -0.281323 | 18.75994 | 19.81094 | 59.51646 | 28.81726 | 1388.74 |
| 902.3239 | -2651.41 | 348.5901 | 0.346469 | 19.10961 | 191.0961 | 52.77562 | 0.04552  | 0.418558 | -0.255436 | 18.70026 | 19.79086 | 59.59197 | 28.84267 | 1388.74 |
| 903.7381 | -2651.9  | 348.1001 | 0.297097 | 16.54651 | 165.4651 | 52.72695 | 0.045474 | 0.418526 | -0.436502 | 18.9538  | 19.77261 | 59.66709 | 28.86709 | 1388.74 |
| 905.1524 | -2652.32 | 347.6799 | 0.332313 | 18.38233 | 183.8233 | 52.64369 | 0.045432 | 0.418497 | -0.306696 | 18.73405 | 19.74138 | 59.74214 | 28.91073 | 1388.74 |
| 906.5666 | -2652.79 | 347.21   | 0.396014 | 21.60425 | 216.0425 | 52.5851  | 0.04536  | 0.418447 | -0.078214 | 18.33411 | 19.71941 | 59.81844 | 28.9395  | 1388.74 |
| 907.9809 | -2653.35 | 346.6499 | 0.395841 | 21.5957  | 215.957  | 52.57014 | 0.045309 | 0.418412 | -0.078699 | 18.32998 | 19.7138  | 59.89559 | 28.94531 | 1388.74 |
| 909.3951 | -2653.91 | 346.0901 | 0.31833  | 17.65784 | 176.5784 | 52.55509 | 0.045296 | 0.418403 | -0.357592 | 18.77961 | 19.70816 | 59.97181 | 28.95299 | 1388.74 |
| 910.8093 | -2654.36 | 345.6399 | 0.296924 | 16.53742 | 165.3742 | 52.48666 | 0.045283 | 0.418394 | -0.436669 | 18.86831 | 19.6825  | 60.04694 | 28.99011 | 1388.74 |
| 912.2236 | -2654.78 | 345.22   | 0.353547 | 19.47088 | 194.7088 | 52.40299 | 0.045225 | 0.418353 | -0.229125 | 18.52729 | 19.65112 | 60.12258 | 29.03356 | 1388.74 |
| 913.6378 | -2655.28 | 344.72   | 0.318158 | 17.64886 | 176.4886 | 52.35902 | 0.045152 | 0.418303 | -0.357869 | 18.71048 | 19.63463 | 60.19853 | 29.05446 | 1388.74 |
| 915.0521 | -2655.73 | 344.27   | 0.381858 | 20.89976 | 208.9976 | 52.29028 | 0.045115 | 0.418277 | -0.127584 | 18.31871 | 19.60886 | 60.27492 | 29.09082 | 1388.74 |
| 916.4663 | -2656.27 | 343.73   | 0.353547 | 19.47088 | 194.7088 | 52.26574 | 0.045055 | 0.418235 | -0.228709 | 18.47877 | 19.59965 | 60.35178 | 29.10162 | 1388.74 |
| 917.8805 | -2656.77 | 343.23   | 0.346471 | 19.10974 | 191.0974 | 52.22174 | 0.045034 | 0.418221 | -0.254233 | 18.50399 | 19.58315 | 60.42826 | 29.12512 | 1388.74 |
| 919.2948 | -2657.26 | 342.74   | 0.381858 | 20.89976 | 208.9976 | 52.17278 | 0.044996 | 0.418194 | -0.127296 | 18.27754 | 19.56479 | 60.50516 | 29.15061 | 1388.74 |
| 920.709  | -2657.8  | 342.2    | 0.388936 | 21.25285 | 212.5285 | 52.14824 | 0.044954 | 0.418165 | -0.102154 | 18.22561 | 19.55559 | 60.58265 | 29.16228 | 1388.74 |
| 922.1233 | -2658.35 | 341.6499 | 0.388763 | 21.24426 | 212.4426 | 52.12854 | 0.044933 | 0.41815  | -0.102712 | 18.21979 | 19.5482  | 60.66026 | 29.17228 | 1388.74 |
| 923.5375 | -2658.9  | 341.1001 | 0.346469 | 19.10961 | 191.0961 | 52.10872 | 0.044916 | 0.418139 | -0.253951 | 18.46396 | 19.54077 | 60.73736 | 29.18255 | 1388.74 |
| 924.9517 | -2659.39 | 340.6101 | 0.339564 | 18.75562 | 187.5562 | 52.05971 | 0.044899 | 0.418127 | -0.278967 | 18.48573 | 19.52239 | 60.81391 | 29.20919 | 1388.74 |
| 926.366  | -2659.87 | 340.1299 | 0.409997 | 22.29348 | 222.9348 | 52.00582 | 0.044857 | 0.418097 | -0.028106 | 18.04445 | 19.50218 | 60.89134 | 29.2374  | 1388.74 |
| 927.7802 | -2660.45 | 339.55   | 0.452637 | 24.35325 | 243.5325 | 52.00039 | 0.04481  | 0.418065 | 0.118108  | 17.76503 | 19.50015 | 60.97033 | 29.2382  | 1388.74 |
| 929.1945 | -2661.09 | 338.9099 | 0.353547 | 19.47088 | 194.7088 | 52.02323 | 0.044806 | 0.418062 | -0.228095 | 18.39303 | 19.50871 | 61.04855 | 29.22513 | 1388.74 |
| 930.6087 | -2661.59 | 338.4099 | 0.452464 | 24.34504 | 243.4504 | 51.97913 | 0.044825 | 0.418075 | 0.11749   | 17.75892 | 19.49218 | 61.12679 | 29.25088 | 1388.74 |
| 932.0229 | -2662.23 | 337.77   | 0.318158 | 17.64886 | 176.4886 | 52.00187 | 0.044787 | 0.418049 | -0.356961 | 18.58285 | 19.5007  | 61.20462 | 29.23625 | 1388.74 |
| 933.4372 | -2662.68 | 337.3201 | 0.297097 | 16.54651 | 165.4651 | 51.93283 | 0.044807 | 0.418063 | -0.434837 | 18.66834 | 19.47481 | 61.28055 | 29.27607 | 1388.74 |
| 934.8514 | -2663.1  | 336.8999 | 0.381686 | 20.89113 | 208.9113 | 51.84863 | 0.044747 | 0.418021 | -0.127301 | 18.16503 | 19.44323 | 61.35734 | 29.32071 | 1388.74 |
| 936.2657 | -2663.64 | 336.3601 | 0.353547 | 19.47088 | 194.7088 | 51.82393 | 0.044675 | 0.417971 | -0.227773 | 18.32257 | 19.43398 | 61.43486 | 29.33113 | 1388.74 |
| 937.6799 | -2664.14 | 335.8601 | 0.396014 | 21.60425 | 216.0425 | 51.77973 | 0.044654 | 0.417956 | -0.076502 | 18.05331 | 19.4174  | 61.51262 | 29.35513 | 1388.74 |
| 939.0941 | -2664.7  | 335.3    | 0.381858 | 20.89976 | 208.9976 | 51.76487 | 0.044615 | 0.417929 | -0.126367 | 18.13465 | 19.41183 | 61.59078 | 29.36169 | 1388.74 |
| 940.5084 | -2665.24 | 334.76   | 0.353547 | 19.47088 | 194.7088 | 51.74032 | 0.044603 | 0.41792  | -0.227595 | 18.29301 | 19.40262 | 61.66843 | 29.375   | 1388.74 |

|          |          |          |          |          |          |          |          |          |           |          |          |          |          |         |
|----------|----------|----------|----------|----------|----------|----------|----------|----------|-----------|----------|----------|----------|----------|---------|
| 941.9226 | -2665.74 | 334.26   | 0.339394 | 18.74688 | 187.4688 | 51.69609 | 0.044581 | 0.417906 | -0.278801 | 18.35756 | 19.38603 | 61.7456  | 29.39909 | 1388.74 |
| 943.3368 | -2666.22 | 333.78   | 0.31108  | 17.27986 | 172.7986 | 51.64185 | 0.044543 | 0.417879 | -0.382421 | 18.49163 | 19.36569 | 61.82236 | 29.4281  | 1388.74 |
| 944.7511 | -2666.66 | 333.3401 | 0.353547 | 19.47088 | 194.7088 | 51.56738 | 0.044497 | 0.417846 | -0.227334 | 18.23186 | 19.33777 | 61.89938 | 29.4683  | 1388.74 |
| 946.1653 | -2667.16 | 332.8401 | 0.431403 | 23.33551 | 233.3551 | 51.52304 | 0.044432 | 0.417802 | 0.046833  | 17.74069 | 19.32114 | 61.97801 | 29.4905  | 1388.74 |
| 947.5796 | -2667.77 | 332.23   | 0.424325 | 22.99274 | 229.9274 | 51.53218 | 0.044394 | 0.417775 | 0.022612  | 17.78932 | 19.32457 | 62.05762 | 29.48339 | 1388.74 |
| 948.9938 | -2668.37 | 331.6299 | 0.304002 | 16.90937 | 169.0937 | 51.5366  | 0.044402 | 0.417781 | -0.408223 | 18.49067 | 19.32622 | 62.13558 | 29.48125 | 1388.74 |
| 950.408  | -2668.8  | 331.2    | 0.325235 | 18.01636 | 180.1636 | 51.45693 | 0.044406 | 0.417783 | -0.330037 | 18.35022 | 19.29635 | 62.21235 | 29.52708 | 1388.74 |
| 951.8223 | -2669.26 | 330.74   | 0.346469 | 19.10961 | 191.0961 | 51.39243 | 0.044337 | 0.417735 | -0.252522 | 18.21015 | 19.27216 | 62.28972 | 29.56075 | 1388.74 |
| 953.2365 | -2669.75 | 330.25   | 0.41017  | 22.30194 | 223.0194 | 51.34302 | 0.044282 | 0.417696 | -0.026115 | 17.8134  | 19.25363 | 62.36824 | 29.58645 | 1388.74 |
| 954.6508 | -2670.33 | 329.6699 | 0.402919 | 21.94544 | 219.4544 | 51.3379  | 0.044239 | 0.417667 | -0.051296 | 17.85674 | 19.25171 | 62.44753 | 29.58729 | 1388.74 |
| 956.065  | -2670.9  | 329.1001 | 0.353547 | 19.47088 | 194.7088 | 51.32785 | 0.044235 | 0.417664 | -0.226688 | 18.14717 | 19.24794 | 62.52609 | 29.59286 | 1388.74 |
| 957.4792 | -2671.4  | 328.6001 | 0.282941 | 15.79838 | 157.9838 | 51.28344 | 0.044226 | 0.417658 | -0.486104 | 18.50484 | 19.23129 | 62.60326 | 29.61806 | 1388.74 |
| 958.8935 | -2671.8  | 328.2    | 0.289846 | 16.16403 | 161.6403 | 51.18811 | 0.044188 | 0.417631 | -0.460249 | 18.43672 | 19.19554 | 62.67983 | 29.67132 | 1388.74 |
| 960.3077 | -2672.21 | 327.79   | 0.318158 | 17.64886 | 176.4886 | 51.09769 | 0.044106 | 0.417573 | -0.355262 | 18.25974 | 19.16163 | 62.75691 | 29.71974 | 1388.74 |
| 961.722  | -2672.66 | 327.3401 | 0.353547 | 19.47088 | 194.7088 | 51.02777 | 0.044028 | 0.417519 | -0.226176 | 18.04108 | 19.13541 | 62.83483 | 29.75658 | 1388.74 |
| 963.1362 | -2673.16 | 326.8401 | 0.37478  | 20.54501 | 205.4501 | 50.98319 | 0.043967 | 0.417477 | -0.149928 | 17.90269 | 19.1187  | 62.91352 | 29.77959 | 1388.74 |
| 964.5504 | -2673.69 | 326.3101 | 0.396017 | 21.60439 | 216.0439 | 50.95362 | 0.043929 | 0.41745  | -0.074728 | 17.76526 | 19.10761 | 62.99282 | 29.79496 | 1388.74 |
| 965.9647 | -2674.25 | 325.75   | 0.290042 | 16.17438 | 161.7438 | 50.93887 | 0.043904 | 0.417432 | -0.458804 | 18.34598 | 19.10207 | 63.07114 | 29.80231 | 1388.74 |
| 966.9647 | -2674.54 | 325.46   | 0.250003 | 14.03638 | 140.3638 | 50.87482 | 0.043891 | 0.417423 | -0.609082 | 18.50842 | 19.07806 | 63.12541 | 29.8392  | 1388.74 |
| 967.9647 | -2674.79 | 325.21   | 0.445386 | 24.00753 | 240.0753 | 50.78968 | 0.043836 | 0.417385 | 0.095922  | 17.39849 | 19.04613 | 63.18111 | 29.88645 | 1388.74 |
| 969.3789 | -2675.42 | 324.5801 | 0.141557 | 8.057076 | 80.57076 | 50.80868 | 0.043762 | 0.417333 | -1.023953 | 18.86518 | 19.05325 | 63.25911 | 29.8716  | 1388.74 |
| 970.7931 | -2675.62 | 324.3799 | 0.459966 | 24.7008  | 247.008  | 50.606   | 0.043779 | 0.417345 | 0.145205  | 17.24088 | 18.97725 | 63.33745 | 29.99206 | 1388.74 |
| 971.7931 | -2676.08 | 323.9199 | 0.349861 | 19.28293 | 192.8293 | 50.6264  | 0.043604 | 0.417222 | -0.238435 | 17.91984 | 18.9849  | 63.39433 | 29.97118 | 1388.74 |
| 972.7931 | -2676.43 | 323.5701 | 0.37478  | 20.54501 | 205.4501 | 50.59291 | 0.043622 | 0.417235 | -0.149078 | 17.76564 | 18.97234 | 63.45037 | 29.9919  | 1388.74 |
| 974.2073 | -2676.96 | 323.04   | 0.250003 | 14.03638 | 140.3638 | 50.56328 | 0.043593 | 0.417214 | -0.608322 | 18.39508 | 18.96123 | 63.52859 | 30.00802 | 1388.74 |
| 975.2073 | -2677.21 | 322.79   | 0.325235 | 18.01636 | 180.1636 | 50.47773 | 0.043567 | 0.417196 | -0.327945 | 18.00102 | 18.92915 | 63.58354 | 30.05759 | 1388.74 |
| 976.6216 | -2677.67 | 322.3301 | 0.09909  | 5.658952 | 56.58952 | 50.41239 | 0.043494 | 0.417145 | -1.186893 | 18.81251 | 18.90465 | 63.66037 | 30.09282 | 1388.74 |
| 978.0358 | -2677.81 | 322.1899 | 0.212163 | 11.9784  | 119.784  | 50.17562 | 0.043437 | 0.417105 | -0.7518   | 18.40616 | 18.81586 | 63.73637 | 30.23196 | 1388.74 |
| 979.4501 | -2678.11 | 321.8899 | 0.296924 | 16.53742 | 165.3742 | 50.02493 | 0.043233 | 0.416962 | -0.431521 | 17.98335 | 18.75935 | 63.8141  | 30.31261 | 1388.74 |
| 980.8643 | -2678.53 | 321.47   | 0.360625 | 19.83055 | 198.3055 | 49.93818 | 0.043103 | 0.416871 | -0.198415 | 17.61632 | 18.72682 | 63.89355 | 30.35861 | 1388.74 |
| 982.2785 | -2679.04 | 320.96   | 0.360625 | 19.83055 | 198.3055 | 49.89822 | 0.043029 | 0.416818 | -0.198229 | 17.60222 | 18.71183 | 63.97386 | 30.37909 | 1388.74 |
| 983.6928 | -2679.55 | 320.45   | 0.374783 | 20.54514 | 205.4514 | 49.85827 | 0.042994 | 0.416794 | -0.14752  | 17.50766 | 18.69685 | 64.05442 | 30.40167 | 1388.74 |
| 985.107  | -2680.08 | 319.9199 | 0.332313 | 18.38233 | 183.8233 | 49.82851 | 0.04296  | 0.416769 | -0.30055  | 17.73222 | 18.68569 | 64.13469 | 30.41805 | 1388.74 |
| 986.5212 | -2680.55 | 319.45   | 0.31108  | 17.27986 | 172.7986 | 49.76785 | 0.042934 | 0.416751 | -0.378383 | 17.8206  | 18.66295 | 64.21424 | 30.45381 | 1388.74 |
| 987.9355 | -2680.99 | 319.01   | 0.318158 | 17.64886 | 176.4886 | 49.69139 | 0.042882 | 0.416715 | -0.352193 | 17.7572  | 18.63427 | 64.29374 | 30.49798 | 1388.74 |
| 989.3497 | -2681.44 | 318.5601 | 0.31108  | 17.27986 | 172.7986 | 49.62011 | 0.042816 | 0.416668 | -0.378085 | 17.7677  | 18.60754 | 64.37336 | 30.53838 | 1388.74 |
| 990.764  | -2681.88 | 318.1201 | 0.31833  | 17.65784 | 176.5784 | 49.54348 | 0.042755 | 0.416625 | -0.351238 | 17.70346 | 18.57881 | 64.4531  | 30.58244 | 1388.74 |
| 992.1782 | -2682.33 | 317.6699 | 0.31108  | 17.27986 | 172.7986 | 49.47219 | 0.042689 | 0.416578 | -0.377764 | 17.71473 | 18.55207 | 64.53296 | 30.62309 | 1388.74 |
| 993.5924 | -2682.77 | 317.23   | 0.275691 | 15.41303 | 154.1303 | 49.39539 | 0.042627 | 0.416535 | -0.509171 | 17.85708 | 18.52327 | 64.61248 | 30.66751 | 1388.74 |
| 995.0067 | -2683.16 | 316.8401 | 0.290019 | 16.17315 | 161.7315 | 49.29173 | 0.042561 | 0.416488 | -0.455491 | 17.75286 | 18.4844  | 64.69191 | 30.72856 | 1388.74 |
| 996.4209 | -2683.57 | 316.4299 | 0.289846 | 16.16403 | 161.6403 | 49.1988  | 0.042472 | 0.416425 | -0.455907 | 17.72021 | 18.44955 | 64.77164 | 30.78194 | 1388.74 |
| 997.8352 | -2683.98 | 316.02   | 0.289846 | 16.16403 | 161.6403 | 49.1056  | 0.042392 | 0.416369 | -0.455703 | 17.68665 | 18.4146  | 64.85153 | 30.83617 | 1388.74 |
| 999.2494 | -2684.39 | 315.6101 | 0.300052 | 16.70197 | 167.0197 | 49.01227 | 0.042311 | 0.416312 | -0.417583 | 17.60422 | 18.3796  | 64.93168 | 30.89068 | 1388.74 |
| 1000.249 | -2684.69 | 315.3101 | 0.25464  | 14.28621 | 142.8621 | 48.95169 | 0.042231 | 0.416255 | -0.587313 | 17.7892  | 18.35688 | 64.98818 | 30.92468 | 1388.74 |
| 1001.664 | -2685.05 | 314.95   | 0.318171 | 17.64957 | 176.4957 | 48.83103 | 0.042179 | 0.416218 | -0.350369 | 17.44969 | 18.31164 | 65.06845 | 30.99834 | 1388.74 |
| 1003.078 | -2685.5  | 314.5    | 0.318171 | 17.64957 | 176.4957 | 48.75888 | 0.042075 | 0.416145 | -0.350106 | 17.4239  | 18.28458 | 65.14955 | 31.03873 | 1388.74 |
| 1004.492 | -2685.95 | 314.05   | 0.268797 | 15.0453  | 150.453  | 48.68667 | 0.042013 | 0.416101 | -0.533454 | 17.63165 | 18.2575  | 65.23023 | 31.08148 | 1388.74 |
| 1005.906 | -2686.33 | 313.6699 | 0.289861 | 16.16479 | 161.6479 | 48.57648 | 0.04195  | 0.416056 | -0.454525 | 17.496   | 18.21618 | 65.31075 | 31.14868 | 1388.74 |
| 1007.32  | -2686.74 | 313.26   | 0.296937 | 16.53808 | 165.3808 | 48.48239 | 0.041855 | 0.415989 | -0.427978 | 17.42876 | 18.1809  | 65.39173 | 31.20408 | 1388.74 |
| 1008.734 | -2687.16 | 312.8401 | 0.261719 | 14.66641 | 146.6641 | 48.39361 | 0.041774 | 0.415932 | -0.559456 | 17.55629 | 18.14761 | 65.47258 | 31.257   | 1388.74 |
| 1010.149 | -2687.53 | 312.47   | 0.289859 | 16.16468 | 161.6468 | 48.27736 | 0.041698 | 0.415877 | -0.453888 | 17.38828 | 18.10401 | 65.55352 | 31.32819 | 1388.74 |
| 1011.563 | -2687.94 | 312.0601 | 0.318171 | 17.64957 | 176.4957 | 48.18281 | 0.041598 | 0.415806 | -0.348898 | 17.21804 | 18.06855 | 65.63525 | 31.38429 | 1388.74 |
| 1012.977 | -2688.39 | 311.6101 | 0.388952 | 21.25367 | 212.5367 | 48.10999 | 0.041516 | 0.415748 | -0.09365  | 16.81416 | 18.04125 | 65.71835 | 31.42742 | 1388.74 |
| 1014.391 | -2688.94 | 311.0601 | 0.36064  | 19.83133 | 198.3133 | 48.09042 | 0.041453 | 0.415704 | -0.194244 | 16.96441 | 18.03391 | 65.80209 | 31.43684 | 1388.74 |
| 1015.805 | -2689.45 | 310.55   | 0.339406 | 18.74749 | 187.4749 | 48.0498  | 0.041437 | 0.415692 | -0.270896 | 17.06268 | 18.01867 | 65.88521 | 31.46251 | 1388.74 |
| 1017.22  | -2689.93 | 310.0701 | 0.332327 | 18.38306 | 183.8306 | 47.9931  | 0.041402 | 0.415667 | -0.296575 | 17.07899 | 17.99741 | 65.96805 | 31.49779 | 1388.74 |
| 1018.634 | -2690.4  | 309.6001 | 0.311266 | 17.28957 | 172.8957 | 47.93096 | 0.041353 | 0.415632 | -0.373691 | 17.16195 | 17.97411 | 66.05065 | 31.536   | 1388.74 |
| 1020.048 | -2690.84 | 309.1599 | 0.339406 | 18.74749 | 187.4749 | 47.85255 | 0.041299 | 0.415594 | -0.270549 | 16.99264 | 17.94471 | 66.13346 | 31.58477 | 1388.74 |
| 1021.462 | -2691.32 | 308.6799 | 0.261546 | 14.65715 | 146.5715 | 47.7957  | 0.041232 | 0.415546 | -0.558707 | 17.34011 | 17.92339 | 66.21584 | 31.61869 | 1388.74 |
| 1022.876 | -2691.69 | 308.3101 | 0.297109 | 16.54717 | 165.4717 | 47.67814 | 0.041183 | 0.415511 | -0.425619 | 17.13884 | 17.8793  | 66.29787 | 31.69398 | 1388.74 |

|          |          |          |          |          |          |          |          |           |           |          |          |          |          |         |
|----------|----------|----------|----------|----------|----------|----------|----------|-----------|-----------|----------|----------|----------|----------|---------|
| 1024.29  | -2692.11 | 307.8899 | 0.28278  | 15.78986 | 157.8986 | 47.58837 | 0.041081 | 0.415439  | -0.478698 | 17.17225 | 17.84564 | 66.38031 | 31.74826 | 1388.74 |
| 1025.705 | -2692.51 | 307.49   | 0.28278  | 15.78986 | 157.8986 | 47.48721 | 0.041004 | 0.415384  | -0.4785   | 17.13575 | 17.8077  | 66.46275 | 31.81167 | 1388.74 |
| 1027.119 | -2692.91 | 307.0901 | 0.268797 | 15.0453  | 47.38588 | 0.040917 | 0.415322 | -0.530634 |           | 17.16057 | 17.7697  | 66.54521 | 31.87493 | 1388.74 |
| 1028.533 | -2693.29 | 306.71   | 0.296937 | 16.53808 | 165.3808 | 47.27326 | 0.04083  | 0.415259  | -0.425355 | 16.9941  | 17.72747 | 66.62803 | 31.94607 | 1388.74 |
| 1029.947 | -2693.71 | 306.29   | 0.296937 | 16.53808 | 165.3808 | 47.18278 | 0.040732 | 0.41519   | -0.425106 | 16.96157 | 17.69354 | 66.71132 | 32.00199 | 1388.74 |
| 1031.361 | -2694.13 | 305.8701 | 0.282953 | 15.79902 | 157.9902 | 47.09217 | 0.040655 | 0.415135  | -0.476955 | 16.99243 | 17.65957 | 66.79462 | 32.05927 | 1388.74 |
| 1032.776 | -2694.53 | 305.47   | 0.289859 | 16.16468 | 161.6468 | 46.99032 | 0.040576 | 0.415079  | -0.451012 | 16.92472 | 17.62137 | 66.87801 | 32.12444 | 1388.74 |
| 1034.19  | -2694.94 | 305.0601 | 0.304187 | 16.9191  | 169.191  | 46.8938  | 0.040489 | 0.415016  | -0.397618 | 16.82403 | 17.58518 | 66.96182 | 32.18569 | 1388.74 |
| 1035.604 | -2695.37 | 304.6299 | 0.275702 | 15.41365 | 154.1365 | 46.80853 | 0.040406 | 0.414957  | -0.503421 | 16.92185 | 17.5532  | 67.04563 | 32.2397  | 1388.74 |
| 1037.018 | -2695.76 | 304.24   | 0.339405 | 18.74749 | 187.4749 | 46.70038 | 0.040332 | 0.414904  | -0.268098 | 16.58349 | 17.51264 | 67.13005 | 32.31028 | 1388.74 |
| 1038.432 | -2696.24 | 303.76   | 0.367718 | 20.18939 | 201.8939 | 46.64264 | 0.040239 | 0.414837  | -0.16584  | 16.41629 | 17.49099 | 67.21575 | 32.34507 | 1388.74 |
| 1039.846 | -2696.76 | 303.24   | 0.339405 | 18.74749 | 187.4749 | 46.60689 | 0.040189 | 0.414802  | -0.267735 | 16.5503  | 17.47758 | 67.30155 | 32.3671  | 1388.74 |
| 1041.261 | -2697.24 | 302.76   | 0.445578 | 24.01668 | 240.1668 | 46.54912 | 0.040158 | 0.41478   | 0.105494  | 15.94471 | 17.45592 | 67.38859 | 32.40554 | 1388.74 |
| 1042.675 | -2697.87 | 302.1299 | 0.183686 | 10.40843 | 104.0843 | 46.57191 | 0.040109 | 0.414744  | -0.852208 | 17.17709 | 17.46447 | 67.47398 | 32.3869  | 1388.74 |
| 1044.089 | -2698.13 | 301.8701 | 0.162797 | 9.246478 | 92.46478 | 46.38789 | 0.040128 | 0.414758  | -0.932575 | 17.16943 | 17.39546 | 67.55633 | 32.51648 | 1388.74 |
| 1045.503 | -2698.36 | 301.6399 | 0.431249 | 23.32806 | 233.2806 | 46.18572 | 0.03997  | 0.414644  | 0.057176  | 15.90381 | 17.31964 | 67.64185 | 32.64987 | 1388.74 |
| 1046.917 | -2698.97 | 301.03   | 0.346484 | 19.11036 | 191.1036 | 46.19817 | 0.039795 | 0.414519  | -0.241073 | 16.36956 | 17.32431 | 67.72949 | 32.63122 | 1388.74 |
| 1048.332 | -2699.46 | 300.54   | 0.296937 | 16.53808 | 165.3808 | 46.14569 | 0.039806 | 0.414527  | -0.422721 | 16.58875 | 17.30463 | 67.8153  | 32.66894 | 1388.74 |
| 1049.746 | -2699.88 | 300.1201 | 0.282953 | 15.79902 | 157.9902 | 46.05357 | 0.039761 | 0.414494  | -0.474646 | 16.61767 | 17.27009 | 67.90048 | 32.73172 | 1388.74 |
| 1051.16  | -2700.28 | 299.72   | 0.275702 | 15.41365 | 154.1365 | 45.94992 | 0.039682 | 0.414437  | -0.501544 | 16.61145 | 17.23122 | 67.98559 | 32.80104 | 1388.74 |
| 1052.574 | -2700.67 | 299.3301 | 0.311266 | 17.28957 | 172.8957 | 45.84016 | 0.039592 | 0.414373  | -0.369183 | 16.41333 | 17.19006 | 68.07124 | 32.87449 | 1388.74 |
| 1053.988 | -2701.11 | 298.8899 | 0.339406 | 18.74749 | 187.4749 | 45.75917 | 0.039498 | 0.414305  | -0.265972 | 16.24927 | 17.15969 | 68.15783 | 32.92727 | 1388.74 |
| 1055.402 | -2701.59 | 298.4099 | 0.304015 | 16.91005 | 169.1005 | 45.70071 | 0.039428 | 0.414255  | -0.395526 | 16.39678 | 17.13777 | 68.24447 | 32.96539 | 1388.74 |
| 1056.817 | -2702.02 | 297.98   | 0.318171 | 17.64957 | 176.4957 | 45.61368 | 0.039378 | 0.414219  | -0.343225 | 16.29997 | 17.10513 | 68.33097 | 33.0254  | 1388.74 |
| 1058.231 | -2702.47 | 297.53   | 0.275875 | 15.42284 | 154.2284 | 45.53801 | 0.039303 | 0.414165  | -0.499912 | 16.46181 | 17.07675 | 68.4173  | 33.07596 | 1388.74 |
| 1059.645 | -2702.86 | 297.1399 | 0.261546 | 14.65715 | 146.5715 | 45.42761 | 0.039237 | 0.414118  | -0.553525 | 16.48098 | 17.03535 | 68.50316 | 33.15258 | 1388.74 |
| 1061.059 | -2703.23 | 296.77   | 0.268797 | 15.0453  | 150.453  | 45.30508 | 0.039142 | 0.414049  | -0.526025 | 16.40702 | 16.9894  | 68.58916 | 33.23674 | 1388.74 |
| 1062.473 | -2703.61 | 296.3899 | 0.176781 | 10.02522 | 100.2522 | 45.18831 | 0.039037 | 0.413973  | -0.875889 | 16.68688 | 16.94562 | 68.67462 | 33.31649 | 1388.74 |
| 1063.887 | -2703.86 | 296.1399 | 0.296937 | 16.53808 | 165.3808 | 44.99339 | 0.038936 | 0.4139    | -0.420469 | 16.17452 | 16.87252 | 68.76069 | 33.45496 | 1388.74 |
| 1065.302 | -2704.28 | 295.72   | 0.254468 | 14.27692 | 142.7692 | 44.89941 | 0.038768 | 0.413779  | -0.578966 | 16.31726 | 16.83728 | 68.84774 | 33.51516 | 1388.74 |
| 1066.716 | -2704.64 | 295.3601 | 0.3325   | 18.39197 | 183.9197 | 44.76974 | 0.038687 | 0.41372   | -0.289019 | 15.93109 | 16.78865 | 68.93545 | 33.60748 | 1388.74 |
| 1068.13  | -2705.11 | 294.8899 | 0.289859 | 16.16468 | 161.6468 | 44.70482 | 0.038575 | 0.41364   | -0.445828 | 16.10154 | 16.76431 | 69.02374 | 33.64971 | 1388.74 |
| 1069.544 | -2705.52 | 294.48   | 0.209953 | 11.85717 | 118.5717 | 44.60453 | 0.038519 | 0.413599  | -0.74738  | 16.3698  | 16.7267  | 69.11085 | 33.72206 | 1388.74 |
| 1070.544 | -2705.73 | 294.27   | 0.229969 | 12.95108 | 129.5108 | 44.48537 | 0.038433 | 0.413537  | -0.670867 | 16.25765 | 16.68201 | 69.17215 | 33.80727 | 1388.74 |
| 1071.544 | -2705.96 | 294.04   | 0.280015 | 15.64306 | 156.4306 | 44.37813 | 0.03833  | 0.413462  | -0.48189  | 16.02539 | 16.6418  | 69.2341  | 33.88288 | 1388.74 |
| 1072.544 | -2706.24 | 293.76   | 0.320056 | 17.74756 | 177.4756 | 44.3009  | 0.038238 | 0.413395  | -0.333366 | 15.82221 | 16.61284 | 69.2969  | 33.93644 | 1388.74 |
| 1073.544 | -2706.56 | 293.4399 | 0.310043 | 17.22569 | 172.2569 | 44.24739 | 0.038171 | 0.413347  | -0.370013 | 15.84851 | 16.59277 | 69.36006 | 33.97352 | 1388.74 |
| 1074.544 | -2706.87 | 293.1299 | 0.28978  | 16.16055 | 161.6055 | 44.18792 | 0.038125 | 0.413313  | -0.444944 | 15.9157  | 16.57047 | 69.42302 | 34.01648 | 1388.74 |
| 1075.544 | -2707.16 | 292.8401 | 0.259999 | 14.57418 | 145.7418 | 44.11631 | 0.038074 | 0.413276  | -0.556293 | 16.01129 | 16.54362 | 69.48567 | 34.06863 | 1388.74 |
| 1076.545 | -2707.42 | 292.5801 | 0.180167 | 10.21323 | 102.1323 | 44.02664 | 0.038012 | 0.413231  | -0.860144 | 16.24838 | 16.50999 | 69.54767 | 34.13432 | 1388.74 |
| 1077.545 | -2707.6  | 292.3999 | 0.169703 | 9.631492 | 96.31492 | 43.88771 | 0.037935 | 0.413175  | -0.900152 | 16.2259  | 16.45789 | 69.60926 | 34.23773 | 1388.74 |
| 1078.959 | -2707.84 | 292.1599 | 0.219077 | 12.35697 | 123.5697 | 43.68145 | 0.037815 | 0.413088  | -0.710687 | 16.00106 | 16.38054 | 69.69702 | 34.39215 | 1388.74 |
| 1080.373 | -2708.15 | 291.8501 | 0.21925  | 12.36641 | 123.6641 | 43.51783 | 0.037638 | 0.412959  | -0.709556 | 15.94055 | 16.31919 | 69.78557 | 34.51065 | 1388.74 |
| 1081.787 | -2708.46 | 291.54   | 0.25464  | 14.28621 | 142.8621 | 43.35386 | 0.037497 | 0.412856  | -0.574962 | 15.75493 | 16.2577  | 69.87481 | 34.63256 | 1388.74 |
| 1083.201 | -2708.82 | 291.1799 | 0.259997 | 14.57404 | 145.7404 | 43.22049 | 0.037355 | 0.412753  | -0.554405 | 15.68617 | 16.20768 | 69.96476 | 34.73076 | 1388.74 |
| 1084.201 | -2709.08 | 290.9199 | 0.240312 | 13.51261 | 135.1261 | 43.12927 | 0.03724  | 0.41267   | -0.628451 | 15.72577 | 16.17348 | 70.02844 | 34.79715 | 1388.74 |
| 1085.616 | -2709.42 | 290.5801 | 0.318344 | 17.65855 | 176.5855 | 42.98274 | 0.037162 | 0.412612  | -0.33685  | 15.35904 | 16.11853 | 70.11942 | 34.91093 | 1388.74 |
| 1087.03  | -2709.87 | 290.1299 | 0.289859 | 16.16468 | 161.6468 | 42.90393 | 0.037036 | 0.41252   | -0.441795 | 15.4529  | 16.08897 | 70.21122 | 34.96724 | 1388.74 |
| 1088.444 | -2710.28 | 289.72   | 0.261546 | 14.65715 | 146.5715 | 42.80037 | 0.036968 | 0.41247   | -0.547548 | 15.52782 | 16.05014 | 70.30251 | 35.04762 | 1388.74 |
| 1089.858 | -2710.65 | 289.3501 | 0.229971 | 12.9512  | 129.512  | 42.67172 | 0.036878 | 0.412405  | -0.666723 | 15.59483 | 16.00189 | 70.39339 | 35.14773 | 1388.74 |
| 1090.858 | -2710.88 | 289.1201 | 0.230213 | 12.96436 | 129.6436 | 42.56061 | 0.036768 | 0.412324  | -0.665508 | 15.5534  | 15.96023 | 70.4576  | 35.23255 | 1388.74 |
| 1091.858 | -2711.11 | 288.8899 | 0.240312 | 13.51261 | 135.1261 | 42.44941 | 0.036672 | 0.412254  | -0.626935 | 15.47788 | 15.91853 | 70.52206 | 35.31884 | 1388.74 |
| 1093.272 | -2711.45 | 288.55   | 0.240484 | 13.52196 | 135.2196 | 42.30089 | 0.036576 | 0.412184  | -0.626025 | 15.42312 | 15.86283 | 70.61359 | 35.43682 | 1388.74 |
| 1094.687 | -2711.79 | 288.21   | 0.261546 | 14.65715 | 146.5715 | 42.15206 | 0.036448 | 0.41209   | -0.546168 | 15.29262 | 15.80702 | 70.70567 | 35.55384 | 1388.74 |
| 1096.101 | -2712.16 | 287.8401 | 0.290031 | 16.17381 | 161.7381 | 42.02176 | 0.03632  | 0.411996  | -0.439265 | 15.13447 | 15.75816 | 70.79862 | 35.65594 | 1388.74 |
| 1097.515 | -2712.57 | 287.4299 | 0.28278  | 15.78986 | 157.8986 | 41.91663 | 0.036208 | 0.411913  | -0.465976 | 15.12561 | 15.71874 | 70.89209 | 35.73821 | 1388.74 |
| 1098.929 | -2712.97 | 287.03   | 0.289859 | 16.16468 | 161.6468 | 41.80484 | 0.036117 | 0.411847  | -0.43937  | 15.05704 | 15.67681 | 70.9858  | 35.82799 | 1388.74 |
| 1100.343 | -2713.38 | 286.6201 | 0.297109 | 16.54717 | 165.4717 | 41.69915 | 0.036021 | 0.411776  | -0.412191 | 14.98958 | 15.63718 | 71.07993 | 35.91262 | 1388.74 |
| 1101.757 | -2713.8  | 286.2    | 0.28278  | 15.78986 | 157.8986 | 41.59974 | 0.03593  | 0.411709  | -0.465238 | 15.01126 | 15.5999  | 71.17421 | 35.99258 | 1388.74 |
| 1103.172 | -2714.2  | 285.8    | 0.282953 | 15.79902 | 157.9902 | 41.48727 | 0.035844 | 0.411646  | -0.464367 | 14.97    | 15.55773 | 71.26855 | 36.08463 | 1388.74 |



|          |          |          |          |          |          |          |          |          |           |          |          |          |          |         |
|----------|----------|----------|----------|----------|----------|----------|----------|----------|-----------|----------|----------|----------|----------|---------|
| 1104.586 | -2714.6  | 285.3999 | 0.289859 | 16.16468 | 161.6468 | 41.37471 | 0.035747 | 0.411574 | -0.43839  | 14.90212 | 15.51552 | 71.36323 | 36.17652 | 1388.74 |
| 1106     | -2715.01 | 284.99   | 0.275702 | 15.41365 | 154.1365 | 41.26816 | 0.03565  | 0.411503 | -0.490936 | 14.91894 | 15.47556 | 71.45807 | 36.26363 | 1388.74 |
| 1107.414 | -2715.4  | 284.6001 | 0.275875 | 15.42284 | 154.2284 | 41.14852 | 0.035558 | 0.411435 | -0.490045 | 14.87503 | 15.4307  | 71.553   | 36.36308 | 1388.74 |
| 1108.828 | -2715.79 | 284.21   | 0.28278  | 15.78986 | 157.8986 | 41.02876 | 0.035455 | 0.411359 | -0.463976 | 14.80522 | 15.38579 | 71.6483  | 36.46248 | 1388.74 |
| 1110.242 | -2716.19 | 283.8101 | 0.247562 | 13.90471 | 139.0471 | 40.91504 | 0.035352 | 0.411283 | -0.595962 | 14.89353 | 15.34314 | 71.74353 | 36.55706 | 1388.74 |
| 1111.657 | -2716.54 | 283.46   | 0.209953 | 11.85717 | 118.5717 | 40.76856 | 0.035254 | 0.411211 | -0.738614 | 14.962   | 15.28821 | 71.83827 | 36.68195 | 1388.74 |
| 1112.657 | -2716.75 | 283.25   | 0.199941 | 11.30669 | 113.0669 | 40.63972 | 0.035128 | 0.411117 | -0.776541 | 14.94412 | 15.23989 | 71.90515 | 36.78989 | 1388.74 |
| 1113.657 | -2716.95 | 283.05   | 0.199941 | 11.30669 | 113.0669 | 40.50383 | 0.035017 | 0.411035 | -0.776239 | 14.89415 | 15.18894 | 71.97218 | 36.90594 | 1388.74 |
| 1114.657 | -2717.15 | 282.8501 | 0.180169 | 10.21333 | 102.1333 | 40.36755 | 0.0349   | 0.410948 | -0.851711 | 14.89796 | 15.13783 | 72.03931 | 37.02273 | 1388.74 |
| 1115.657 | -2717.33 | 282.6699 | 0.233233 | 13.12859 | 131.2859 | 40.2175  | 0.034782 | 0.410861 | -0.648695 | 14.68737 | 15.08156 | 72.10692 | 37.15298 | 1388.74 |
| 1117.071 | -2717.66 | 282.3401 | 0.280015 | 15.64306 | 156.4306 | 40.0553  | 0.034653 | 0.410766 | -0.472152 | 14.46437 | 15.02074 | 72.20394 | 37.29473 | 1388.74 |
| 1118.071 | -2717.94 | 282.0601 | 0.280015 | 15.64306 | 156.4306 | 39.97147 | 0.034513 | 0.410662 | -0.471778 | 14.4341  | 14.9893  | 72.27315 | 37.36351 | 1388.74 |
| 1119.071 | -2718.22 | 281.78   | 0.229971 | 12.9512  | 129.512  | 39.88753 | 0.034441 | 0.410608 | -0.660156 | 14.57732 | 14.95783 | 72.34209 | 37.43724 | 1388.74 |
| 1120.071 | -2718.45 | 281.55   | 0.199941 | 11.30669 | 113.0669 | 39.76984 | 0.034369 | 0.410554 | -0.774471 | 14.62424 | 14.91369 | 72.41058 | 37.54312 | 1388.74 |
| 1121.071 | -2718.65 | 281.3501 | 0.183859 | 10.418   | 104.18   | 39.63135 | 0.034267 | 0.410479 | -0.835815 | 14.61676 | 14.86176 | 72.47898 | 37.66739 | 1388.74 |
| 1122.485 | -2718.91 | 281.0901 | 0.120328 | 6.861322 | 68.61322 | 39.41926 | 0.034148 | 0.41039  | -1.079942 | 14.67636 | 14.78222 | 72.57554 | 37.86186 | 1388.74 |
| 1123.9   | -2719.08 | 280.9199 | 0.183859 | 10.418   | 104.18   | 39.14376 | 0.033965 | 0.410254 | -0.834986 | 14.43692 | 14.67891 | 72.67269 | 38.11157 | 1388.74 |
| 1125.314 | -2719.34 | 280.6599 | 0.226155 | 12.74337 | 127.4337 | 38.92924 | 0.033728 | 0.410077 | -0.672718 | 14.23887 | 14.59847 | 72.77132 | 38.30919 | 1388.74 |
| 1126.728 | -2719.66 | 280.3401 | 0.240484 | 13.52196 | 135.2196 | 38.75546 | 0.033543 | 0.409939 | -0.617841 | 14.13044 | 14.5333  | 72.87102 | 38.46802 | 1388.74 |
| 1128.142 | -2720    | 280      | 0.21996  | 12.40522 | 124.0522 | 38.59514 | 0.033393 | 0.409827 | -0.69538  | 14.13527 | 14.47318 | 72.97108 | 38.61727 | 1388.74 |
| 1129.142 | -2720.22 | 279.78   | 0.176782 | 10.02529 | 100.2529 | 38.46701 | 0.033255 | 0.409724 | -0.860193 | 14.20487 | 14.42513 | 73.04166 | 38.73612 | 1388.74 |
| 1130.556 | -2720.47 | 279.53   | 0.240484 | 13.52196 | 135.2196 | 38.24213 | 0.033145 | 0.409641 | -0.616755 | 13.94328 | 14.3408  | 73.14214 | 38.95604 | 1388.74 |
| 1131.971 | -2720.81 | 279.1899 | 0.28278  | 15.78986 | 157.8986 | 38.07995 | 0.032951 | 0.409496 | -0.457253 | 13.74114 | 14.27998 | 73.2443  | 39.10809 | 1388.74 |
| 1133.385 | -2721.21 | 278.79   | 0.346484 | 19.11036 | 191.1036 | 37.95919 | 0.032811 | 0.409391 | -0.222902 | 13.45022 | 14.2347  | 73.34832 | 39.22245 | 1388.74 |
| 1134.799 | -2721.7  | 278.3    | 0.282953 | 15.79902 | 157.9902 | 37.90014 | 0.032707 | 0.409313 | -0.455949 | 13.67564 | 14.21255 | 73.45259 | 39.27607 | 1388.74 |
| 1136.213 | -2722.1  | 277.8999 | 0.233233 | 13.12859 | 131.2859 | 37.77916 | 0.032656 | 0.409275 | -0.6429   | 13.79689 | 14.16719 | 73.55554 | 39.39816 | 1388.74 |
| 1137.627 | -2722.43 | 277.5701 | 0.240484 | 13.52196 | 135.2196 | 37.60803 | 0.032552 | 0.409196 | -0.615133 | 13.71208 | 14.10301 | 73.65835 | 39.56986 | 1388.74 |
| 1139.041 | -2722.77 | 277.23   | 0.233406 | 13.13797 | 131.3797 | 37.44354 | 0.032405 | 0.409085 | -0.641554 | 13.6738  | 14.04133 | 73.76163 | 39.73292 | 1388.74 |
| 1140.456 | -2723.1  | 276.8999 | 0.24739  | 13.89539 | 138.9539 | 37.27124 | 0.032263 | 0.408979 | -0.588226 | 13.5677  | 13.97671 | 73.86546 | 39.90619 | 1388.74 |
| 1141.87  | -2723.45 | 276.55   | 0.21996  | 12.40522 | 124.0522 | 37.11252 | 0.032114 | 0.408867 | -0.691862 | 13.59227 | 13.9172  | 73.9696  | 40.06588 | 1388.74 |
| 1142.87  | -2723.67 | 276.3301 | 0.249988 | 14.03557 | 140.3557 | 36.97995 | 0.031978 | 0.408764 | -0.577634 | 13.45347 | 13.86748 | 74.04355 | 40.19938 | 1388.74 |
| 1143.87  | -2723.92 | 276.0801 | 0.280018 | 15.64321 | 156.4321 | 36.86887 | 0.031863 | 0.408677 | -0.464601 | 13.31371 | 13.82582 | 74.11827 | 40.31199 | 1388.74 |
| 1144.87  | -2724.2  | 275.8    | 0.275875 | 15.42284 | 154.2284 | 36.77925 | 0.031768 | 0.408605 | -0.479814 | 13.29555 | 13.79222 | 74.19343 | 40.40306 | 1388.74 |
| 1146.284 | -2724.59 | 275.4099 | 0.24739  | 13.89539 | 138.9539 | 36.64806 | 0.03169  | 0.408547 | -0.586653 | 13.34084 | 13.74302 | 74.29962 | 40.5419  | 1388.74 |
| 1147.698 | -2724.94 | 275.0601 | 0.261719 | 14.66641 | 146.6641 | 36.48708 | 0.031577 | 0.408461 | -0.532354 | 13.23682 | 13.68265 | 74.40604 | 40.71225 | 1388.74 |
| 1149.112 | -2725.31 | 274.6899 | 0.198015 | 11.20055 | 112.0055 | 36.34035 | 0.031439 | 0.408356 | -0.773754 | 13.36807 | 13.62763 | 74.51235 | 40.86612 | 1388.74 |
| 1150.527 | -2725.59 | 274.4099 | 0.176781 | 10.02522 | 100.2522 | 36.12623 | 0.031312 | 0.40826  | -0.854794 | 13.34049 | 13.54734 | 74.61824 | 41.09869 | 1388.74 |
| 1151.941 | -2725.84 | 274.1599 | 0.254468 | 14.27692 | 142.7692 | 35.88829 | 0.031128 | 0.40812  | -0.558402 | 13.04246 | 13.45811 | 74.72545 | 41.357   | 1388.74 |
| 1153.355 | -2726.2  | 273.8    | 0.275875 | 15.42284 | 154.2284 | 35.73182 | 0.030923 | 0.407965 | -0.4775   | 12.91691 | 13.39943 | 74.8344  | 41.52226 | 1388.74 |
| 1154.769 | -2726.59 | 273.4099 | 0.275702 | 15.41365 | 154.1365 | 35.59743 | 0.030788 | 0.407862 | -0.477774 | 12.8689  | 13.34904 | 74.94409 | 41.66854 | 1388.74 |
| 1156.183 | -2726.98 | 273.02   | 0.240484 | 13.52196 | 135.2196 | 35.46245 | 0.030672 | 0.407774 | -0.609948 | 12.92979 | 13.29842 | 75.05372 | 41.8181  | 1388.74 |
| 1157.598 | -2727.32 | 272.6799 | 0.212172 | 11.97889 | 119.7889 | 35.28949 | 0.030556 | 0.407686 | -0.717212 | 12.94539 | 13.23356 | 75.16303 | 42.01394 | 1388.74 |
| 1159.012 | -2727.62 | 272.3799 | 0.211999 | 11.96943 | 119.6943 | 35.0851  | 0.030407 | 0.407572 | -0.717454 | 12.87086 | 13.15691 | 75.27259 | 42.24692 | 1388.74 |
| 1160.426 | -2727.92 | 272.0801 | 0.226328 | 12.75278 | 127.5278 | 34.87946 | 0.030231 | 0.407438 | -0.662408 | 12.75714 | 13.0798  | 75.38295 | 42.48199 | 1388.74 |
| 1161.84  | -2728.24 | 271.76   | 0.233406 | 13.13797 | 131.3797 | 34.68848 | 0.030053 | 0.407302 | -0.635043 | 12.6677  | 13.00818 | 75.49419 | 42.7017  | 1388.74 |
| 1163.254 | -2728.57 | 271.4299 | 0.240312 | 13.51261 | 135.1261 | 34.50437 | 0.029889 | 0.407177 | -0.608422 | 12.58097 | 12.93914 | 75.60621 | 42.91628 | 1388.74 |
| 1164.668 | -2728.91 | 271.0901 | 0.240484 | 13.52196 | 135.2196 | 34.32705 | 0.02973  | 0.407055 | -0.607326 | 12.51582 | 12.87264 | 75.71891 | 43.12511 | 1388.74 |
| 1166.083 | -2729.25 | 270.75   | 0.240484 | 13.52196 | 135.2196 | 34.14913 | 0.029578 | 0.406938 | -0.606899 | 12.45095 | 12.80592 | 75.83219 | 43.33733 | 1388.74 |
| 1167.497 | -2729.59 | 270.4099 | 0.233233 | 13.12859 | 131.2859 | 33.9704  | 0.029424 | 0.40682  | -0.633938 | 12.40594 | 12.7389  | 75.94598 | 43.55275 | 1388.74 |
| 1168.911 | -2729.92 | 270.0801 | 0.21925  | 12.36641 | 123.6641 | 33.78274 | 0.02927  | 0.406702 | -0.686637 | 12.37459 | 12.66853 | 76.06012 | 43.78196 | 1388.74 |
| 1170.325 | -2730.23 | 269.77   | 0.289859 | 16.16468 | 161.6468 | 33.57834 | 0.029109 | 0.406578 | -0.420394 | 12.09406 | 12.59188 | 76.17571 | 44.03501 | 1388.74 |
| 1171.739 | -2730.64 | 269.3601 | 0.275875 | 15.42284 | 154.2284 | 33.45244 | 0.028932 | 0.406443 | -0.471997 | 12.09292 | 12.54466 | 76.29265 | 44.18602 | 1388.74 |
| 1173.154 | -2731.03 | 268.97   | 0.21925  | 12.36641 | 123.6641 | 33.31055 | 0.028824 | 0.406359 | -0.68538  | 12.20163 | 12.49145 | 76.40906 | 44.36511 | 1388.74 |
| 1174.568 | -2731.34 | 268.6599 | 0.176781 | 10.02522 | 100.2522 | 33.10363 | 0.028702 | 0.406265 | -0.847425 | 12.22432 | 12.41386 | 76.52486 | 44.63207 | 1388.74 |
| 1175.982 | -2731.59 | 268.4099 | 0.198015 | 11.20055 | 112.0055 | 32.8462  | 0.028523 | 0.406127 | -0.765555 | 12.08272 | 12.31732 | 76.64122 | 44.96665 | 1388.74 |
| 1177.396 | -2731.87 | 268.1299 | 0.268624 | 15.03607 | 150.3607 | 32.61181 | 0.028302 | 0.405956 | -0.497362 | 11.81073 | 12.22943 | 76.75959 | 45.27073 | 1388.74 |
| 1178.81  | -2732.25 | 267.75   | 0.289859 | 16.16468 | 161.6468 | 32.45844 | 0.0281   | 0.4058   | -0.417591 | 11.6907  | 12.17191 | 76.87994 | 45.46714 | 1388.74 |
| 1180.224 | -2732.66 | 267.3401 | 0.247562 | 13.90471 | 139.0471 | 32.32906 | 0.027967 | 0.405697 | -0.575563 | 11.76814 | 12.1234  | 77.00051 | 45.63758 | 1388.74 |
| 1181.639 | -2733.01 | 266.99   | 0.205093 | 11.59026 | 115.9026 | 32.15    | 0.027856 | 0.405611 | -0.736608 | 11.81042 | 12.05625 | 77.12046 | 45.88199 | 1388.74 |
| 1183.053 | -2733.3  | 266.7    | 0.233233 | 13.12859 | 131.2859 | 31.91959 | 0.027702 | 0.405491 | -0.629084 | 11.65699 | 11.96985 | 77.24098 | 46.19955 | 1388.74 |

|          |          |          |          |          |          |          |          |          |           |          |          |          |          |         |
|----------|----------|----------|----------|----------|----------|----------|----------|----------|-----------|----------|----------|----------|----------|---------|
| 1184.467 | -2733.63 | 266.3701 | 0.247562 | 13.90471 | 139.0471 | 31.7214  | 0.027503 | 0.405337 | -0.574319 | 11.54695 | 11.89552 | 77.36288 | 46.47053 | 1388.74 |
| 1185.881 | -2733.98 | 266.02   | 0.261719 | 14.66641 | 146.6641 | 31.53933 | 0.027332 | 0.405205 | -0.52054  | 11.44187 | 11.82725 | 77.48591 | 46.72349 | 1388.74 |
| 1187.295 | -2734.35 | 265.6499 | 0.268624 | 15.03607 | 150.3607 | 31.37335 | 0.027176 | 0.405082 | -0.494199 | 11.36222 | 11.76501 | 77.60994 | 46.95652 | 1388.74 |
| 1188.71  | -2734.73 | 265.27   | 0.21925  | 12.36641 | 123.6641 | 31.21494 | 0.027032 | 0.404971 | -0.680296 | 11.43401 | 11.7056  | 77.73401 | 47.18184 | 1388.74 |
| 1190.124 | -2735.04 | 264.96   | 0.212172 | 11.97889 | 119.7889 | 30.99577 | 0.026896 | 0.404865 | -0.706864 | 11.3703  | 11.62341 | 77.85804 | 47.50297 | 1388.74 |
| 1191.538 | -2735.34 | 264.6599 | 0.226155 | 12.74337 | 127.4337 | 30.76644 | 0.026707 | 0.404717 | -0.653114 | 11.25322 | 11.53741 | 77.98305 | 47.83965 | 1388.74 |
| 1192.952 | -2735.66 | 264.3401 | 0.226328 | 12.75278 | 127.5278 | 30.55296 | 0.02651  | 0.404563 | -0.651893 | 11.17472 | 11.45736 | 78.10916 | 48.15553 | 1388.74 |
| 1194.366 | -2735.98 | 264.02   | 0.226328 | 12.75278 | 127.5278 | 30.33839 | 0.026326 | 0.404419 | -0.651367 | 11.09625 | 11.3769  | 78.23616 | 48.47885 | 1388.74 |
| 1195.78  | -2736.3  | 263.7    | 0.240312 | 13.51261 | 135.1261 | 30.12248 | 0.026141 | 0.404274 | -0.597839 | 10.98324 | 11.29593 | 78.36426 | 48.80885 | 1388.74 |
| 1197.195 | -2736.64 | 263.3601 | 0.25464  | 14.28621 | 142.8621 | 29.92289 | 0.025955 | 0.404128 | -0.543243 | 10.87407 | 11.22108 | 78.49366 | 49.11668 | 1388.74 |
| 1198.609 | -2737    | 263      | 0.240484 | 13.52196 | 135.2196 | 29.74032 | 0.025783 | 0.403993 | -0.596162 | 10.84347 | 11.15262 | 78.62389 | 49.40168 | 1388.74 |
| 1200.023 | -2737.34 | 262.6599 | 0.24739  | 13.89539 | 138.9539 | 29.53873 | 0.025625 | 0.403869 | -0.569627 | 10.75286 | 11.07702 | 78.75486 | 49.7236  | 1388.74 |
| 1201.437 | -2737.69 | 262.3101 | 0.233406 | 13.13797 | 131.3797 | 29.3448  | 0.025452 | 0.403733 | -0.622007 | 10.71627 | 11.0043  | 78.8866  | 50.03526 | 1388.74 |
| 1202.851 | -2738.02 | 261.98   | 0.289859 | 16.16468 | 161.6468 | 29.13164 | 0.025285 | 0.403601 | -0.409672 | 10.49248 | 10.92437 | 79.01996 | 50.38494 | 1388.74 |
| 1204.265 | -2738.43 | 261.5701 | 0.25464  | 14.28621 | 142.8621 | 28.99022 | 0.025101 | 0.403456 | -0.540801 | 10.53514 | 10.87133 | 79.15447 | 50.61256 | 1388.74 |
| 1205.68  | -2738.79 | 261.21   | 0.226329 | 12.75287 | 127.5287 | 28.80262 | 0.024979 | 0.40336  | -0.647488 | 10.53454 | 10.80098 | 79.2887  | 50.93006 | 1388.74 |
| 1207.094 | -2739.11 | 260.8899 | 0.211999 | 11.96943 | 119.6943 | 28.57656 | 0.024817 | 0.403232 | -0.701533 | 10.48322 | 10.71621 | 79.42327 | 51.31671 | 1388.74 |
| 1208.508 | -2739.41 | 260.5901 | 0.318344 | 17.65855 | 176.5855 | 28.32968 | 0.024623 | 0.403078 | -0.302782 | 10.12306 | 10.62363 | 79.56053 | 51.74412 | 1388.74 |
| 1209.922 | -2739.86 | 260.1399 | 0.233233 | 13.12859 | 131.2859 | 28.2222  | 0.02441  | 0.40291  | -0.619655 | 10.30671 | 10.58332 | 79.69897 | 51.91946 | 1388.74 |
| 1211.336 | -2740.19 | 259.8101 | 0.297109 | 16.54717 | 165.4717 | 28.0014  | 0.024317 | 0.402836 | -0.380056 | 10.06565 | 10.50052 | 79.83781 | 52.31933 | 1388.74 |
| 1212.751 | -2740.61 | 259.3899 | 0.190765 | 10.80024 | 108.0024 | 27.86491 | 0.024127 | 0.402685 | -0.780625 | 10.26424 | 10.44934 | 79.97693 | 52.55589 | 1388.74 |
| 1214.165 | -2740.88 | 259.1201 | 0.233406 | 13.13797 | 131.3797 | 27.58318 | 0.024009 | 0.402592 | -0.61784  | 10.07295 | 10.34369 | 80.116   | 53.08036 | 1388.74 |
| 1215.579 | -2741.21 | 258.79   | 0.212172 | 11.97889 | 119.7889 | 27.35792 | 0.023767 | 0.402399 | -0.697817 | 10.03582 | 10.25922 | 80.25666 | 53.49173 | 1388.74 |
| 1216.993 | -2741.51 | 258.49   | 0.240484 | 13.52196 | 135.2196 | 27.10142 | 0.023573 | 0.402244 | -0.589784 | 9.881316 | 10.16303 | 80.39866 | 53.97727 | 1388.74 |
| 1218.407 | -2741.85 | 258.1499 | 0.204921 | 11.58077 | 115.8077 | 26.88257 | 0.023352 | 0.402068 | -0.72425  | 9.875742 | 10.08096 | 80.54182 | 54.39284 | 1388.74 |
| 1219.821 | -2742.14 | 257.8601 | 0.247562 | 13.90471 | 139.0471 | 26.61164 | 0.023163 | 0.401917 | -0.561868 | 9.686935 | 9.979364 | 80.6864  | 54.92602 | 1388.74 |
| 1221.236 | -2742.49 | 257.51   | 0.289859 | 16.16468 | 161.6468 | 26.39931 | 0.02293  | 0.40173  | -0.402933 | 9.50836  | 9.899741 | 80.83374 | 55.34205 | 1388.74 |
| 1222.65  | -2742.9  | 257.1001 | 0.318344 | 17.65855 | 176.5855 | 26.24582 | 0.022747 | 0.401584 | -0.297441 | 9.37843  | 9.842182 | 80.9835  | 55.6454  | 1388.74 |
| 1224.064 | -2743.35 | 256.6499 | 0.304015 | 16.91005 | 169.1005 | 26.13185 | 0.022614 | 0.401477 | -0.349683 | 9.375741 | 9.799444 | 81.13431 | 55.87332 | 1388.74 |
| 1225.478 | -2743.78 | 256.22   | 0.275702 | 15.41365 | 154.1365 | 25.99728 | 0.022516 | 0.401399 | -0.454408 | 9.39833  | 9.74898  | 81.28496 | 56.15151 | 1388.74 |
| 1226.892 | -2744.17 | 255.8301 | 0.261719 | 14.66641 | 146.6641 | 25.82151 | 0.0224   | 0.401306 | -0.506395 | 9.367555 | 9.683064 | 81.43568 | 56.52064 | 1388.74 |
| 1228.307 | -2744.54 | 255.46   | 0.226328 | 12.75278 | 127.5278 | 25.62429 | 0.022249 | 0.401184 | -0.639534 | 9.372066 | 9.609107 | 81.58661 | 56.93838 | 1388.74 |
| 1229.721 | -2744.86 | 255.1399 | 0.240312 | 13.51261 | 135.1261 | 25.3733  | 0.022079 | 0.401047 | -0.586073 | 9.251597 | 9.514986 | 81.73848 | 57.482   | 1388.74 |
| 1231.135 | -2745.2  | 254.8    | 0.205093 | 11.59026 | 115.9026 | 25.14101 | 0.021863 | 0.400873 | -0.719202 | 9.23564  | 9.42788  | 81.89147 | 57.98788 | 1388.74 |
| 1232.549 | -2745.49 | 254.51   | 0.134312 | 7.649733 | 76.49733 | 24.85333 | 0.021662 | 0.400711 | -0.990107 | 9.237055 | 9.32     | 82.04458 | 58.63547 | 1388.74 |
| 1233.963 | -2745.68 | 254.3201 | 0.148468 | 8.444919 | 84.44919 | 24.45271 | 0.021415 | 0.400511 | -0.934912 | 9.070342 | 9.169765 | 82.19907 | 59.56635 | 1388.74 |
| 1235.377 | -2745.89 | 254.1101 | 0.247562 | 13.90471 | 139.0471 | 24.06822 | 0.021069 | 0.400232 | -0.555733 | 8.761102 | 9.025581 | 82.35769 | 60.47569 | 1388.74 |
| 1236.792 | -2746.24 | 253.76   | 0.268797 | 15.0453  | 150.453  | 23.83601 | 0.020738 | 0.399963 | -0.475011 | 8.632102 | 8.938506 | 82.5203  | 61.0238  | 1388.74 |
| 1238.206 | -2746.62 | 253.3799 | 0.275702 | 15.41365 | 154.1365 | 23.63561 | 0.020538 | 0.3998   | -0.448628 | 8.544557 | 8.863353 | 82.68497 | 61.5162  | 1388.74 |
| 1239.62  | -2747.01 | 252.99   | 0.233406 | 13.13797 | 131.3797 | 23.44473 | 0.020365 | 0.399659 | -0.607132 | 8.561653 | 8.791773 | 82.85031 | 61.99524 | 1388.74 |
| 1241.034 | -2747.34 | 252.6599 | 0.275702 | 15.41365 | 154.1365 | 23.1843  | 0.020201 | 0.399525 | -0.447636 | 8.381405 | 8.694114 | 83.01724 | 62.6706  | 1388.74 |
| 1242.448 | -2747.73 | 252.27   | 0.311093 | 17.28055 | 172.8055 | 22.99014 | 0.019976 | 0.399342 | -0.315998 | 8.232151 | 8.621302 | 83.18748 | 63.17093 | 1388.74 |
| 1243.863 | -2748.17 | 251.8301 | 0.275875 | 15.42284 | 154.2284 | 22.85191 | 0.019809 | 0.399206 | -0.445836 | 8.260876 | 8.569468 | 83.35897 | 63.53128 | 1388.74 |
| 1245.277 | -2748.56 | 251.4399 | 0.233233 | 13.12859 | 131.2859 | 22.65572 | 0.01969  | 0.399108 | -0.605773 | 8.273834 | 8.495893 | 83.53003 | 64.06582 | 1388.74 |
| 1246.691 | -2748.89 | 251.1101 | 0.233406 | 13.13797 | 131.3797 | 22.38683 | 0.019521 | 0.39897  | -0.604614 | 8.175324 | 8.39506  | 83.70197 | 64.81284 | 1388.74 |
| 1248.105 | -2749.22 | 250.78   | 0.275875 | 15.42284 | 154.2284 | 22.11523 | 0.019289 | 0.39878  | -0.444297 | 7.994567 | 8.29321  | 83.87689 | 65.57758 | 1388.74 |
| 1249.519 | -2749.61 | 250.3899 | 0.261546 | 14.65715 | 146.5715 | 21.91319 | 0.019055 | 0.398588 | -0.497183 | 7.950029 | 8.217448 | 84.05428 | 66.15031 | 1388.74 |
| 1250.933 | -2749.98 | 250.02   | 0.240484 | 13.52196 | 135.2196 | 21.68503 | 0.018881 | 0.398445 | -0.575933 | 7.906472 | 8.131885 | 84.23265 | 66.82233 | 1388.74 |
| 1252.348 | -2750.32 | 249.6799 | 0.268624 | 15.03607 | 150.3607 | 21.41794 | 0.018685 | 0.398283 | -0.469574 | 7.756742 | 8.031727 | 84.41322 | 67.62815 | 1388.74 |
| 1253.762 | -2750.7  | 249.3    | 0.297109 | 16.54717 | 165.4717 | 21.19746 | 0.018455 | 0.398093 | -0.363007 | 7.619842 | 7.949047 | 84.59716 | 68.29902 | 1388.74 |
| 1255.176 | -2751.12 | 248.8799 | 0.24739  | 13.89539 | 138.9539 | 21.02524 | 0.018265 | 0.397936 | -0.548029 | 7.653734 | 7.884466 | 84.78234 | 68.83133 | 1388.74 |
| 1256.59  | -2751.47 | 248.53   | 0.21925  | 12.36641 | 123.6641 | 20.76312 | 0.018116 | 0.397814 | -0.654079 | 7.605515 | 7.78617  | 84.96769 | 69.67881 | 1388.74 |
| 1258.004 | -2751.78 | 248.22   | 0.190937 | 10.80978 | 108.0978 | 20.44632 | 0.01789  | 0.397627 | -0.761333 | 7.531316 | 7.667372 | 85.15455 | 70.72517 | 1388.74 |
| 1259.418 | -2752.05 | 247.95   | 0.219962 | 12.40534 | 124.0534 | 20.07187 | 0.017617 | 0.397401 | -0.64986  | 7.351213 | 7.52695  | 85.34459 | 72.00362 | 1388.74 |
| 1260.419 | -2752.27 | 247.73   | 0.205093 | 11.59026 | 115.9026 | 19.84162 | 0.017295 | 0.397133 | -0.705463 | 7.288891 | 7.440609 | 85.48121 | 72.79004 | 1388.74 |
| 1261.833 | -2752.56 | 247.4399 | 0.226155 | 12.74337 | 127.4337 | 19.48407 | 0.017096 | 0.396968 | -0.624769 | 7.126552 | 7.306527 | 85.67741 | 74.095   | 1388.74 |
| 1263.247 | -2752.88 | 247.1201 | 0.240484 | 13.52196 | 135.2196 | 19.16161 | 0.016788 | 0.396711 | -0.569611 | 6.986421 | 7.185603 | 85.87782 | 75.29319 | 1388.74 |
| 1264.661 | -2753.22 | 246.78   | 0.233406 | 13.13797 | 131.3797 | 18.86266 | 0.01651  | 0.396479 | -0.595517 | 6.888354 | 7.073499 | 86.08167 | 76.44174 | 1388.74 |
| 1266.075 | -2753.55 | 246.45   | 0.205093 | 11.59026 | 115.9026 | 18.54517 | 0.016253 | 0.396263 | -0.70227  | 6.812634 | 6.95444  | 86.2881  | 77.70816 | 1388.74 |
| 1267.489 | -2753.84 | 246.1599 | 0.198015 | 11.20055 | 112.0055 | 18.16436 | 0.015979 | 0.396034 | -0.728427 | 6.681894 | 6.811634 | 86.4977  | 79.29141 | 1388.74 |







2008055

[illegible]
